# Supplementary material for: Reframing the Model I, II and III Harvest Scheduling Formulations in the Context of Managing Forests for Ecosystem Services
Source: Preprints.org preprint supplement (doi:10.20944/preprints202407.1262.v1), 2024-07-16
Supplement: Supplementary file 1 [file supplementary]

## Sheet: Scenarios
SceName	SceDescription	AcctVarList	ConstraintList	ObjectiveList	AArea
00_OnlyVolume	Consider only Interventions + ending inventory	VolCut, DscTmbRev	VolFlow1,VolFlow2	TmbRev	1
01_Inventory	VolCut,DscTmbCst,DscTmbRev,Inventory	VolCut,DscTmbCst,DscTmbRev,Inventory	VolFlow1,VolFlow2,FStock	TmbNPV	1
01_NPV	Regular Harvest Scheduling	VolCut,DscTmbCst,DscTmbRev	VolFlow1,VolFlow2	TmbNPV	1
02_Carbon	Harvest Scheduling and Carbon Analysis	VolCut,DscCosts,DscRevenue,CRemoved	VolFlow1,VolFlow2,NDC	NPV	1
03_Water1	Add Area covered by Age Control	VolCut,DscCosts,DscRevenue,CRemoved,AgeControl	VolFlow1,VolFlow2,NDC,NDAge	NPV	1
03_Water2	Add Area Covered by Plantation by micro-watershed	VolCut,DscCosts,DscRevenue,CRemoved,PltCover	VolFlow1,VolFlow2,NDC,Cover	NPV	1
03_Water	Harvest, Carbon and Water	VolCut,DscCosts,DscRevenue,CRemoved,PltCover,AgeControl	VolFlow1,VolFlow2,NDC,Cover,NDAge	NPV	1
01_NPV_Inv	Regular Harvest Scheduling with Inventory	VolCut,DscTmbCst,DscTmbRev, Inventory	VolFlow1,VolFlow2	TmbNPV	1
02_Carbon_Inv	Harvest Scheduling and Carbon Analysis with Inventory	VolCut,DscCosts,DscRevenue,CRemoved, Inventory	VolFlow1,VolFlow2,NDC	NPV	1
03_Water2_Inv	Harvest, Carbon and Water with Inventory	VolCut,DscCosts,DscRevenue,CRemoved,PltCover,AgeControl,Inventory	VolFlow1,VolFlow2,NDC,Cover,NDAge	NPV	1

## Sheet: LogRun
LogRunId	Scenario	ModelType	GettingDataTime	BuildingTime	SolverTime	B+S	ObjFctValue
4	00_OnlyVolume	m1	9.50062	30.4712	3.24479	33.716	5.21021e+08
5	00_OnlyVolume	m2	12.5997	16.4702	3.75176	20.2219	5.21021e+08		Sum of B+S	Column Labels
6	00_OnlyVolume	m3	9.76001	12.9355	10.3993	23.3348	5.21021e+08		Row Labels	m1	m2	m3
1	01_Inventory	m1	13.1676	61.5177	11.6714	73.1891	2.9415e+08		01_NPV	55.8888	29.9925	30.5037
2	01_Inventory	m2	11.7546	28.8113	9.30054	38.1118	2.9415e+08		02_Carbon	88.2943	46.3502	41.8697
3	01_Inventory	m3	9.40893	19.0831	15.0488	34.1319	2.9415e+08		03_Water	209.517	105.097	71.1114
7	01_NPV	m1	9.82716	47.2919	8.59691	55.8888	2.94981e+08
8	01_NPV	m2	10.4036	23.4541	6.53839	29.9925	2.94981e+08
9	01_NPV	m3	10.3489	18.1799	12.3237	30.5037	2.94981e+08
10	02_Carbon	m1	10.5884	67.6545	20.6398	88.2943	4.45695e+08
11	02_Carbon	m2	9.25029	32.9058	13.4444	46.3502	4.45695e+08
12	02_Carbon	m3	12.2454	23.9417	17.928	41.8697	4.45695e+08
13	03_Water1	m1	11.0635	83.91	25.863	109.773	4.45695e+08
14	03_Water1	m2	9.30634	40.4906	18.7975	59.2881	4.45695e+08
15	03_Water1	m3	10.2671	27.0599	20.1941	47.2541	4.45695e+08
16	03_Water2	m1	10.4975	165.769	22.3765	188.146	4.37761e+08
17	03_Water2	m2	9.75233	77.1384	15.9196	93.058	4.37761e+08
18	03_Water2	m3	9.59963	44.2162	18.1528	62.3689	4.37761e+08
19	03_Water	m1	11.2896	182.975	26.5419	209.517	4.37761e+08
20	03_Water	m2	9.8706	84.7471	20.3502	105.097	4.37761e+08
21	03_Water	m3	10.5309	49.0507	22.0607	71.1114	4.37761e+08
22	01_NPV_Inv	m1	16.5094	62.0737	11.6234	73.6971	2.94981e+08
23	01_NPV_Inv	m2	19.7811	29.5028	9.08603	38.5888	2.94981e+08
24	01_NPV_Inv	m3	8.83204	19.0221	14.5239	33.546	2.94981e+08
25	02_Carbon_Inv	m1	11.0529	79.1451	23.9599	103.105	4.45695e+08
26	02_Carbon_Inv	m2	8.75536	39.307	15.3221	54.6291	4.45695e+08
27	02_Carbon_Inv	m3	8.99023	28.8409	17.9306	46.7715	4.45695e+08
28	03_Water_Inv	m1	10.4775	195.92	31.5614	227.481	4.37761e+08
29	03_Water_Inv	m2	16.801	92.7854	23.3259	116.111	4.37761e+08
30	03_Water_Inv	m3	13.9132	51.2189	23.7871	75.006	4.37761e+08

## Sheet: LogBuilding
LogRunId	Scenario	ModelType	ConstName	ConstRows	CountCoeff	BuildingTime		8
1	01_Inventory	m1	cAcctDscTmbCst	21	2194603	14.9037
1	01_Inventory	m1	cAcctDscTmbRev	21	327807	13.9843
1	01_Inventory	m1	cAcctInventory	21	1930685	14.7291			Column Labels
1	01_Inventory	m1	cAcctVolCut	21	263918	14.186			Sum of ConstRows			Sum of CountCoeff
1	01_Inventory	m1	cCofArea	350	83848	0		Row Labels	m1	m2	m3	m1	m2	m3
1	01_Inventory	m1	cIniArea	350	350	0		01_NPV
1	01_Inventory	m1	constNDC	21	28	0		cAcctDscTmbCst	21	21	21	2194603	911250	425841
1	01_Inventory	m1	oNPV	21	42	0		cAcctDscTmbRev	21	21	21	327807	147387	147387
2	01_Inventory	m2	cAcctDscTmbCst	21	911250	6.5713		cAcctVolCut	21	21	21	263918	83498	83498
2	01_Inventory	m2	cAcctDscTmbRev	21	147387	5.95784		cCofArea	350	63889	342343	83848	147387	425841
2	01_Inventory	m2	cAcctInventory	21	827752	5.85909		02_Carbon
2	01_Inventory	m2	cAcctVolCut	21	83498	5.92652		cAcctCRemoved	21	21	21	2186882	903529	418120
2	01_Inventory	m2	cCofArea	63889	147387	0		cAcctDscCosts	21	21	21	2194603	911250	425841
2	01_Inventory	m2	cIniArea	350	350	0		cAcctDscRevenue	21	21	21	2188819	905466	420057
2	01_Inventory	m2	constNDC	21	28	0		cAcctVolCut	21	21	21	263918	83498	83498
2	01_Inventory	m2	oNPV	21	42	0		cCofArea	350	63889	342343	83848	147387	425841
3	01_Inventory	m3	cAcctDscTmbCst	21	425841	2.46393		03_Water
3	01_Inventory	m3	cAcctDscTmbRev	21	147387	2.58511		cAcctAgeControl	21	21	21	1930685	827752	342343
3	01_Inventory	m3	cAcctInventory	21	342343	2.57723		cAcctCRemoved	21	21	21	2186882	903529	418120
3	01_Inventory	m3	cAcctVolCut	21	83498	2.54046		cAcctDscCosts	21	21	21	2194603	911250	425841
3	01_Inventory	m3	cCofArea	342343	425841	0		cAcctDscRevenue	21	21	21	2188819	905466	420057
3	01_Inventory	m3	cIniArea	350	350	0		cAcctPltCover	21	21	21	1285305	543212	224799
3	01_Inventory	m3	constNDC	21	28	0		cAcctVolCut	21	21	21	263918	83498	83498
3	01_Inventory	m3	oNPV	21	42	0		cCofArea	350	63889	342343	83848	147387	425841
4	00_OnlyVolume	m1	cAcctDscTmbRev	21	327807	14.8819
4	00_OnlyVolume	m1	cAcctVolCut	21	263918	14.0209
4	00_OnlyVolume	m1	cCofArea	350	83848	0		Conservation of Area Constraints
4	00_OnlyVolume	m1	cIniArea	350	350	0		Building Phase
4	00_OnlyVolume	m1	constNDC	21	28	0
4	00_OnlyVolume	m1	oNPV	21	42	0			m1		m2		mn
5	00_OnlyVolume	m2	cAcctDscTmbRev	21	147387	6.19848		Scenarios	Rows	NonZeros	Rows	NonZeros	Rows	NonZeros
5	00_OnlyVolume	m2	cAcctVolCut	21	83498	6.19341		01_NPV	350	83848	63889	147387	#REF!	#REF!
5	00_OnlyVolume	m2	cCofArea	63889	147387	0		02_Carbon	350	83848	63889	147387	#REF!	#REF!
5	00_OnlyVolume	m2	cIniArea	350	350	0		03_Water	350	83848	63889	147387	#REF!	#REF!
5	00_OnlyVolume	m2	constNDC	21	28	0
5	00_OnlyVolume	m2	oNPV	21	42	0
6	00_OnlyVolume	m3	cAcctDscTmbRev	21	147387	2.70829
6	00_OnlyVolume	m3	cAcctVolCut	21	83498	3.45041
6	00_OnlyVolume	m3	cCofArea	342343	425841	0
6	00_OnlyVolume	m3	cIniArea	350	350	0
6	00_OnlyVolume	m3	constNDC	21	28	0
6	00_OnlyVolume	m3	oNPV	21	42	0
7	01_NPV	m1	cAcctDscTmbCst	21	2194603	15.2994
7	01_NPV	m1	cAcctDscTmbRev	21	327807	14.2743
7	01_NPV	m1	cAcctVolCut	21	263918	13.9729
7	01_NPV	m1	cCofArea	350	83848	0
7	01_NPV	m1	cIniArea	350	350	0
7	01_NPV	m1	constNDC	21	28	0
7	01_NPV	m1	oNPV	21	42	0
8	01_NPV	m2	cAcctDscTmbCst	21	911250	6.86781
8	01_NPV	m2	cAcctDscTmbRev	21	147387	6.26579
8	01_NPV	m2	cAcctVolCut	21	83498	6.30131
8	01_NPV	m2	cCofArea	63889	147387	0
8	01_NPV	m2	cIniArea	350	350	0
8	01_NPV	m2	constNDC	21	28	0
8	01_NPV	m2	oNPV	21	42	0
9	01_NPV	m3	cAcctDscTmbCst	21	425841	2.84598
9	01_NPV	m3	cAcctDscTmbRev	21	147387	3.83995
9	01_NPV	m3	cAcctVolCut	21	83498	2.93519
9	01_NPV	m3	cCofArea	342343	425841	0
9	01_NPV	m3	cIniArea	350	350	0
9	01_NPV	m3	constNDC	21	28	0
9	01_NPV	m3	oNPV	21	42	0
10	02_Carbon	m1	cAcctCRemoved	21	2186882	16.9965
10	02_Carbon	m1	cAcctDscCosts	21	2194603	16.4925
10	02_Carbon	m1	cAcctDscRevenue	21	2188819	15.2769
10	02_Carbon	m1	cAcctVolCut	21	263918	14.1123
10	02_Carbon	m1	cCofArea	350	83848	0
10	02_Carbon	m1	cIniArea	350	350	0
10	02_Carbon	m1	constNDC	21	28	0
10	02_Carbon	m1	oNPV	21	42	0
11	02_Carbon	m2	cAcctCRemoved	21	903529	6.14782
11	02_Carbon	m2	cAcctDscCosts	21	911250	6.16574
11	02_Carbon	m2	cAcctDscRevenue	21	905466	8.6199
11	02_Carbon	m2	cAcctVolCut	21	83498	6.3028
11	02_Carbon	m2	cCofArea	63889	147387	0
11	02_Carbon	m2	cIniArea	350	350	0
11	02_Carbon	m2	constNDC	21	28	0
11	02_Carbon	m2	oNPV	21	42	0
12	02_Carbon	m3	cAcctCRemoved	21	418120	4.35305
12	02_Carbon	m3	cAcctDscCosts	21	425841	2.96803
12	02_Carbon	m3	cAcctDscRevenue	21	420057	3.00379
12	02_Carbon	m3	cAcctVolCut	21	83498	3.00181
12	02_Carbon	m3	cCofArea	342343	425841	0
12	02_Carbon	m3	cIniArea	350	350	0
12	02_Carbon	m3	constNDC	21	28	0
12	02_Carbon	m3	oNPV	21	42	0
13	03_Water1	m1	cAcctAgeControl	21	1930685	14.4547
13	03_Water1	m1	cAcctCRemoved	21	2186882	16.0357
13	03_Water1	m1	cAcctDscCosts	21	2194603	17.8145
13	03_Water1	m1	cAcctDscRevenue	21	2188819	15.6734
13	03_Water1	m1	cAcctVolCut	21	263918	14.1594
13	03_Water1	m1	cCofArea	350	83848	0
13	03_Water1	m1	cIniArea	350	350	0
13	03_Water1	m1	constNDC	21	28	0
13	03_Water1	m1	oNPV	21	42	0
14	03_Water1	m2	cAcctAgeControl	21	827752	7.82038
14	03_Water1	m2	cAcctCRemoved	21	903529	6.1934
14	03_Water1	m2	cAcctDscCosts	21	911250	7.53155
14	03_Water1	m2	cAcctDscRevenue	21	905466	6.14557
14	03_Water1	m2	cAcctVolCut	21	83498	6.27331
14	03_Water1	m2	cCofArea	63889	147387	0
14	03_Water1	m2	cIniArea	350	350	0
14	03_Water1	m2	constNDC	21	28	0
14	03_Water1	m2	oNPV	21	42	0
15	03_Water1	m3	cAcctAgeControl	21	342343	2.53965
15	03_Water1	m3	cAcctCRemoved	21	418120	3.91245
15	03_Water1	m3	cAcctDscCosts	21	425841	2.53791
15	03_Water1	m3	cAcctDscRevenue	21	420057	2.54177
15	03_Water1	m3	cAcctVolCut	21	83498	2.57899
15	03_Water1	m3	cCofArea	342343	425841	0
15	03_Water1	m3	cIniArea	350	350	0
15	03_Water1	m3	constNDC	21	28	0
15	03_Water1	m3	oNPV	21	42	0
16	03_Water2	m1	cAcctCRemoved	21	2186882	15.6848
16	03_Water2	m1	cAcctDscCosts	21	2194603	17.7687
16	03_Water2	m1	cAcctDscRevenue	21	2188819	15.5063
16	03_Water2	m1	cAcctPltCover	21	1285305	97.1774
16	03_Water2	m1	cAcctVolCut	21	263918	14.2108
16	03_Water2	m1	cCofArea	350	83848	0
16	03_Water2	m1	cIniArea	350	350	0
16	03_Water2	m1	constNDC	21	28	0
16	03_Water2	m1	oNPV	21	42	0
17	03_Water2	m2	cAcctCRemoved	21	903529	8.15476
17	03_Water2	m2	cAcctDscCosts	21	911250	9.19661
17	03_Water2	m2	cAcctDscRevenue	21	905466	6.47719
17	03_Water2	m2	cAcctPltCover	21	543212	40.6535
17	03_Water2	m2	cAcctVolCut	21	83498	6.33758
17	03_Water2	m2	cCofArea	63889	147387	0
17	03_Water2	m2	cIniArea	350	350	0
17	03_Water2	m2	constNDC	21	28	0
17	03_Water2	m2	oNPV	21	42	0
18	03_Water2	m3	cAcctCRemoved	21	418120	4.26946
18	03_Water2	m3	cAcctDscCosts	21	425841	2.83748
18	03_Water2	m3	cAcctDscRevenue	21	420057	2.88136
18	03_Water2	m3	cAcctPltCover	21	224799	17.6792
18	03_Water2	m3	cAcctVolCut	21	83498	2.93598
18	03_Water2	m3	cCofArea	342343	425841	0
18	03_Water2	m3	cIniArea	350	350	0
18	03_Water2	m3	constNDC	21	28	0
18	03_Water2	m3	oNPV	21	42	0
19	03_Water	m1	cAcctAgeControl	21	1930685	16.2422
19	03_Water	m1	cAcctCRemoved	21	2186882	15.7138
19	03_Water	m1	cAcctDscCosts	21	2194603	17.6649
19	03_Water	m1	cAcctDscRevenue	21	2188819	15.2366
19	03_Water	m1	cAcctPltCover	21	1285305	97.5987
19	03_Water	m1	cAcctVolCut	21	263918	14.1193
19	03_Water	m1	cCofArea	350	83848	0
19	03_Water	m1	cIniArea	350	350	0
19	03_Water	m1	constNDC	21	28	0
19	03_Water	m1	oNPV	21	42	0
20	03_Water	m2	cAcctAgeControl	21	827752	8.3436
20	03_Water	m2	cAcctCRemoved	21	903529	6.27238
20	03_Water	m2	cAcctDscCosts	21	911250	6.22682
20	03_Water	m2	cAcctDscRevenue	21	905466	9.50084
20	03_Water	m2	cAcctPltCover	21	543212	40.9534
20	03_Water	m2	cAcctVolCut	21	83498	6.28903
20	03_Water	m2	cCofArea	63889	147387	0
20	03_Water	m2	cIniArea	350	350	0
20	03_Water	m2	constNDC	21	28	0
20	03_Water	m2	oNPV	21	42	0
21	03_Water	m3	cAcctAgeControl	21	342343	4.59504
21	03_Water	m3	cAcctCRemoved	21	418120	2.93121
21	03_Water	m3	cAcctDscCosts	21	425841	2.9596
21	03_Water	m3	cAcctDscRevenue	21	420057	2.93561
21	03_Water	m3	cAcctPltCover	21	224799	18.2752
21	03_Water	m3	cAcctVolCut	21	83498	3.02903
21	03_Water	m3	cCofArea	342343	425841	0
21	03_Water	m3	cIniArea	350	350	0
21	03_Water	m3	constNDC	21	28	0
21	03_Water	m3	oNPV	21	42	0
22	01_NPV_Inv	m1	cAcctDscTmbCst	21	2194603	14.8324
22	01_NPV_Inv	m1	cAcctDscTmbRev	21	327807	13.9403
22	01_NPV_Inv	m1	cAcctInventory	21	1930685	14.4588
22	01_NPV_Inv	m1	cAcctVolCut	21	263918	14.9086
22	01_NPV_Inv	m1	cCofArea	350	83848	0
22	01_NPV_Inv	m1	cIniArea	350	350	0
22	01_NPV_Inv	m1	constNDC	21	28	0
22	01_NPV_Inv	m1	oNPV	21	42	0
23	01_NPV_Inv	m2	cAcctDscTmbCst	21	911250	6.93247
23	01_NPV_Inv	m2	cAcctDscTmbRev	21	147387	6.20886
23	01_NPV_Inv	m2	cAcctInventory	21	827752	5.77561
23	01_NPV_Inv	m2	cAcctVolCut	21	83498	6.13903
23	01_NPV_Inv	m2	cCofArea	63889	147387	0
23	01_NPV_Inv	m2	cIniArea	350	350	0
23	01_NPV_Inv	m2	constNDC	21	28	0
23	01_NPV_Inv	m2	oNPV	21	42	0
24	01_NPV_Inv	m3	cAcctDscTmbCst	21	425841	2.39005
24	01_NPV_Inv	m3	cAcctDscTmbRev	21	147387	2.51373
24	01_NPV_Inv	m3	cAcctInventory	21	342343	2.4921
24	01_NPV_Inv	m3	cAcctVolCut	21	83498	2.5987
24	01_NPV_Inv	m3	cCofArea	342343	425841	0
24	01_NPV_Inv	m3	cIniArea	350	350	0
24	01_NPV_Inv	m3	constNDC	21	28	0
24	01_NPV_Inv	m3	oNPV	21	42	0
25	02_Carbon_Inv	m1	cAcctCRemoved	21	2186882	14.859
25	02_Carbon_Inv	m1	cAcctDscCosts	21	2194603	14.8978
25	02_Carbon_Inv	m1	cAcctDscRevenue	21	2188819	14.4235
25	02_Carbon_Inv	m1	cAcctInventory	21	1930685	15.3024
25	02_Carbon_Inv	m1	cAcctVolCut	21	263918	13.8666
25	02_Carbon_Inv	m1	cCofArea	350	83848	0
25	02_Carbon_Inv	m1	cIniArea	350	350	0
25	02_Carbon_Inv	m1	constNDC	21	28	0
25	02_Carbon_Inv	m1	oNPV	21	42	0
26	02_Carbon_Inv	m2	cAcctCRemoved	21	903529	7.21127
26	02_Carbon_Inv	m2	cAcctDscCosts	21	911250	5.76782
26	02_Carbon_Inv	m2	cAcctDscRevenue	21	905466	5.69392
26	02_Carbon_Inv	m2	cAcctInventory	21	827752	5.83604
26	02_Carbon_Inv	m2	cAcctVolCut	21	83498	8.50925
26	02_Carbon_Inv	m2	cCofArea	63889	147387	0
26	02_Carbon_Inv	m2	cIniArea	350	350	0
26	02_Carbon_Inv	m2	constNDC	21	28	0
26	02_Carbon_Inv	m2	oNPV	21	42	0
27	02_Carbon_Inv	m3	cAcctCRemoved	21	418120	4.00854
27	02_Carbon_Inv	m3	cAcctDscCosts	21	425841	2.72668
27	02_Carbon_Inv	m3	cAcctDscRevenue	21	420057	2.68351
27	02_Carbon_Inv	m3	cAcctInventory	21	342343	2.76597
27	02_Carbon_Inv	m3	cAcctVolCut	21	83498	2.87445
27	02_Carbon_Inv	m3	cCofArea	342343	425841	0
27	02_Carbon_Inv	m3	cIniArea	350	350	0
27	02_Carbon_Inv	m3	constNDC	21	28	0
27	02_Carbon_Inv	m3	oNPV	21	42	0
28	03_Water_Inv	m1	cAcctAgeControl	21	1930685	16.1552
28	03_Water_Inv	m1	cAcctCRemoved	21	2186882	15.4175
28	03_Water_Inv	m1	cAcctDscCosts	21	2194603	17.1526
28	03_Water_Inv	m1	cAcctDscRevenue	21	2188819	15.1469
28	03_Water_Inv	m1	cAcctInventory	21	1930685	14.295
28	03_Water_Inv	m1	cAcctPltCover	21	1285305	96.3376
28	03_Water_Inv	m1	cAcctVolCut	21	263918	14.0349
28	03_Water_Inv	m1	cCofArea	350	83848	0
28	03_Water_Inv	m1	cIniArea	350	350	0
28	03_Water_Inv	m1	constNDC	21	28	0
28	03_Water_Inv	m1	oNPV	21	42	0
29	03_Water_Inv	m2	cAcctAgeControl	21	827752	6.51093
29	03_Water_Inv	m2	cAcctCRemoved	21	903529	8.32505
29	03_Water_Inv	m2	cAcctDscCosts	21	911250	6.65675
29	03_Water_Inv	m2	cAcctDscRevenue	21	905466	7.30751
29	03_Water_Inv	m2	cAcctInventory	21	827752	6.53029
29	03_Water_Inv	m2	cAcctPltCover	21	543212	42.7628
29	03_Water_Inv	m2	cAcctVolCut	21	83498	6.61747
29	03_Water_Inv	m2	cCofArea	63889	147387	0
29	03_Water_Inv	m2	cIniArea	350	350	0
29	03_Water_Inv	m2	constNDC	21	28	0
29	03_Water_Inv	m2	oNPV	21	42	0
30	03_Water_Inv	m3	cAcctAgeControl	21	342343	3.09412
30	03_Water_Inv	m3	cAcctCRemoved	21	418120	2.86423
30	03_Water_Inv	m3	cAcctDscCosts	21	425841	2.89203
30	03_Water_Inv	m3	cAcctDscRevenue	21	420057	4.30049
30	03_Water_Inv	m3	cAcctInventory	21	342343	3.03235
30	03_Water_Inv	m3	cAcctPltCover	21	224799	19.5592
30	03_Water_Inv	m3	cAcctVolCut	21	83498	2.98628
30	03_Water_Inv	m3	cCofArea	342343	425841	0
30	03_Water_Inv	m3	cIniArea	350	350	0
30	03_Water_Inv	m3	constNDC	21	28	0
30	03_Water_Inv	m3	oNPV	21	42	0

## Sheet: CoeffxBuildingTime
LogRunId	Scenario	ModelType	ConstName	CountCoeff	BuildingTime
15	03_Water1	m3	cAcctAgeControl	342343	2.53965
21	03_Water	m3	cAcctAgeControl	342343	4.59504
3	01_Inventory	m3	cAcctInventory	342343	2.57723
30	03_Water_Inv	m3	cAcctAgeControl	342343	3.09412
24	01_NPV_Inv	m3	cAcctInventory	342343	2.4921
27	02_Carbon_Inv	m3	cAcctInventory	342343	2.76597
30	03_Water_Inv	m3	cAcctInventory	342343	3.03235
21	03_Water	m3	cAcctCRemoved	418120	2.93121
15	03_Water1	m3	cAcctCRemoved	418120	3.91245
18	03_Water2	m3	cAcctCRemoved	418120	4.26946
12	02_Carbon	m3	cAcctCRemoved	418120	4.35305
27	02_Carbon_Inv	m3	cAcctCRemoved	418120	4.00854
30	03_Water_Inv	m3	cAcctCRemoved	418120	2.86423
15	03_Water1	m3	cAcctDscRevenue	420057	2.54177
18	03_Water2	m3	cAcctDscRevenue	420057	2.88136
21	03_Water	m3	cAcctDscRevenue	420057	2.93561
12	02_Carbon	m3	cAcctDscRevenue	420057	3.00379
27	02_Carbon_Inv	m3	cAcctDscRevenue	420057	2.68351
30	03_Water_Inv	m3	cAcctDscRevenue	420057	4.30049		Excluded: VolCut, DscTmbCst, DscTmbRev, PltCover
15	03_Water1	m3	cAcctDscCosts	425841	2.53791		Accounting Constraints between interventions and with a single index (per period only).
18	03_Water2	m3	cAcctDscCosts	425841	2.83748
21	03_Water	m3	cAcctDscCosts	425841	2.9596
12	02_Carbon	m3	cAcctDscCosts	425841	2.96803
27	02_Carbon_Inv	m3	cAcctDscCosts	425841	2.72668
30	03_Water_Inv	m3	cAcctDscCosts	425841	2.89203
14	03_Water1	m2	cAcctAgeControl	827752	7.82038
20	03_Water	m2	cAcctAgeControl	827752	8.3436
2	01_Inventory	m2	cAcctInventory	827752	5.85909
29	03_Water_Inv	m2	cAcctAgeControl	827752	6.51093
23	01_NPV_Inv	m2	cAcctInventory	827752	5.77561
26	02_Carbon_Inv	m2	cAcctInventory	827752	5.83604
29	03_Water_Inv	m2	cAcctInventory	827752	6.53029
11	02_Carbon	m2	cAcctCRemoved	903529	6.14782
14	03_Water1	m2	cAcctCRemoved	903529	6.1934
20	03_Water	m2	cAcctCRemoved	903529	6.27238
17	03_Water2	m2	cAcctCRemoved	903529	8.15476
26	02_Carbon_Inv	m2	cAcctCRemoved	903529	7.21127
29	03_Water_Inv	m2	cAcctCRemoved	903529	8.32505
14	03_Water1	m2	cAcctDscRevenue	905466	6.14557
17	03_Water2	m2	cAcctDscRevenue	905466	6.47719
11	02_Carbon	m2	cAcctDscRevenue	905466	8.6199
20	03_Water	m2	cAcctDscRevenue	905466	9.50084
26	02_Carbon_Inv	m2	cAcctDscRevenue	905466	5.69392
29	03_Water_Inv	m2	cAcctDscRevenue	905466	7.30751
11	02_Carbon	m2	cAcctDscCosts	911250	6.16574
20	03_Water	m2	cAcctDscCosts	911250	6.22682
14	03_Water1	m2	cAcctDscCosts	911250	7.53155
17	03_Water2	m2	cAcctDscCosts	911250	9.19661
26	02_Carbon_Inv	m2	cAcctDscCosts	911250	5.76782
29	03_Water_Inv	m2	cAcctDscCosts	911250	6.65675
13	03_Water1	m1	cAcctAgeControl	1930685	14.4547
19	03_Water	m1	cAcctAgeControl	1930685	16.2422
1	01_Inventory	m1	cAcctInventory	1930685	14.7291
28	03_Water_Inv	m1	cAcctAgeControl	1930685	16.1552
22	01_NPV_Inv	m1	cAcctInventory	1930685	14.4588
25	02_Carbon_Inv	m1	cAcctInventory	1930685	15.3024
28	03_Water_Inv	m1	cAcctInventory	1930685	14.295
16	03_Water2	m1	cAcctCRemoved	2186882	15.6848
19	03_Water	m1	cAcctCRemoved	2186882	15.7138
13	03_Water1	m1	cAcctCRemoved	2186882	16.0357
10	02_Carbon	m1	cAcctCRemoved	2186882	16.9965
25	02_Carbon_Inv	m1	cAcctCRemoved	2186882	14.859
28	03_Water_Inv	m1	cAcctCRemoved	2186882	15.4175
19	03_Water	m1	cAcctDscRevenue	2188819	15.2366
10	02_Carbon	m1	cAcctDscRevenue	2188819	15.2769
16	03_Water2	m1	cAcctDscRevenue	2188819	15.5063
13	03_Water1	m1	cAcctDscRevenue	2188819	15.6734
25	02_Carbon_Inv	m1	cAcctDscRevenue	2188819	14.4235
28	03_Water_Inv	m1	cAcctDscRevenue	2188819	15.1469
10	02_Carbon	m1	cAcctDscCosts	2194603	16.4925
19	03_Water	m1	cAcctDscCosts	2194603	17.6649
16	03_Water2	m1	cAcctDscCosts	2194603	17.7687
13	03_Water1	m1	cAcctDscCosts	2194603	17.8145
25	02_Carbon_Inv	m1	cAcctDscCosts	2194603	14.8978
28	03_Water_Inv	m1	cAcctDscCosts	2194603	17.1526

## Sheet: LogSolver
LogRunId	SolverRes	SolverValue	Scenario	ModelType
1	After Columns	76324	01_Inventory	m1
1	After NonZeros	425457	01_Inventory	m1
1	After Rows	414	01_Inventory	m1		Sum of SolverValue	Column Labels
1	Before Columns	84282	01_Inventory	m1		Row Labels	m1	m2	m3
1	Before NonZeros	3934137	01_Inventory	m1		01_NPV
1	Before Rows	825	01_Inventory	m1		After Columns	51580	54959	54959
1	PresolveTime	0.25	01_Inventory	m1		After NonZeros	213781	172361	172361
1	ReadingTime	2.44	01_Inventory	m1		After Rows	411	2530	2530
1	Removed Columns	7958	01_Inventory	m1		Before Columns	84261	147800	426254
1	Removed Rows	411	01_Inventory	m1		Before NonZeros	2437224	1342663	1423744
2	After Columns	80454	01_Inventory	m2		Before Rows	803	64342	342796
2	After NonZeros	283986	01_Inventory	m2		02_Carbon
2	After Rows	4544	01_Inventory	m2		After Columns	76336	88086	90947
2	Before Columns	147821	01_Inventory	m2		After NonZeros	1371451	1050952	638231
2	Before NonZeros	2159197	01_Inventory	m2		After Rows	438	12188	15049
2	Before Rows	64364	01_Inventory	m2		Before Columns	84282	147821	426275
2	PresolveTime	0.26	01_Inventory	m2		Before NonZeros	5617575	2981836	2111263
2	ReadingTime	1.38	01_Inventory	m2		Before Rows	837	64376	342830
2	Removed Columns	67367	01_Inventory	m2		03_Water
2	Removed Rows	59820	01_Inventory	m2		After Columns	76357	98265	98907
3	After Columns	79846	01_Inventory	m3		After NonZeros	3661587	2272978	1241941
3	After NonZeros	292607	01_Inventory	m3		After Rows	666	22575	23213
3	After Rows	3936	01_Inventory	m3		Before Columns	84492	148031	426485
3	Before Columns	426275	01_Inventory	m3		Before NonZeros	8128597	4335300	2676189
3	Before NonZeros	1764451	01_Inventory	m3		Before Rows	1256	64795	343249
3	Before Rows	342818	01_Inventory	m3
3	PresolveTime	0.63	01_Inventory	m3
3	ReadingTime	1.31	01_Inventory	m3		Presolve Analysis
3	Removed Columns	346429	01_Inventory	m3				m1		m2		m3
3	Removed Rows	338882	01_Inventory	m3		Scenarios		Before	After	Before	After	Before	After
4	After Columns	51580	00_OnlyVolume	m1		01_NPV	Columns	84261	51580	147800	54959	426254	54959
4	After NonZeros	213781	00_OnlyVolume	m1			Rows	803	411	64342	2530	342796	2530
4	After Rows	411	00_OnlyVolume	m1			NonZeros	2437224	213781	1342663	172361	1423744	172361
4	Before Columns	84240	00_OnlyVolume	m1		02_Carbon	Columns	84282	76336	147821	88086	426275	90947
4	Before NonZeros	676395	00_OnlyVolume	m1			Rows	837	438	64376	12188	342830	15049
4	Before Rows	782	00_OnlyVolume	m1			NonZeros	5617575	1371451	2981836	1050952	2111263	638231
4	PresolveTime	0.1	00_OnlyVolume	m1		03_Water	Columns	84492	76357	148031	98265	426485	98907
4	ReadingTime	0.41	00_OnlyVolume	m1			Rows	1256	666	64795	22575	343249	23213
4	Removed Columns	32660	00_OnlyVolume	m1			NonZeros	8128597	3661587	4335300	2272978	2676189	1241941
4	Removed Rows	371	00_OnlyVolume	m1
5	After Columns	54959	00_OnlyVolume	m2
5	After NonZeros	172361	00_OnlyVolume	m2
5	After Rows	2530	00_OnlyVolume	m2		Columns per Management Unit
5	Before Columns	147779	00_OnlyVolume	m2				m1		m2		m3
5	Before NonZeros	442633	00_OnlyVolume	m2				Before	After	Before	After	Before	After
5	Before Rows	64321	00_OnlyVolume	m2		01_NPV		240.746	147.371	422.286	157.026	1217.87	157.026
5	PresolveTime	0.15	00_OnlyVolume	m2		02_Carbon		240.806	218.103	422.346	251.674	1217.93	259.849
5	ReadingTime	0.32	00_OnlyVolume	m2		03_Water		241.406	218.163	422.946	280.757	1218.53	282.591
5	Removed Columns	92820	00_OnlyVolume	m2
5	Removed Rows	61791	00_OnlyVolume	m2
6	After Columns	54959	00_OnlyVolume	m3
6	After NonZeros	172361	00_OnlyVolume	m3
6	After Rows	2530	00_OnlyVolume	m3
6	Before Columns	426233	00_OnlyVolume	m3		Decision Variables		m1		m2		mn
6	Before NonZeros	999541	00_OnlyVolume	m3		01_NPV		84158		147697		426151
6	Before Rows	342775	00_OnlyVolume	m3		02_Carbon		84158		147697		426151
6	PresolveTime	0.43	00_OnlyVolume	m3		03_Water		84326		147865		426319
6	ReadingTime	0.81	00_OnlyVolume	m3
6	Removed Columns	371274	00_OnlyVolume	m3		Decision Variables per MgmUnits
6	Removed Rows	340245	00_OnlyVolume	m3			Number of AcctVar
7	After Columns	51580	01_NPV	m1
7	After NonZeros	213781	01_NPV	m1		01_NPV	103	240		421		1217
7	After Rows	411	01_NPV	m1		02_Carbon	124	240		421		1217
7	Before Columns	84261	01_NPV	m1		03_Water	166	240		422		1218
7	Before NonZeros	2437224	01_NPV	m1
7	Before Rows	803	01_NPV	m1
7	PresolveTime	0.18	01_NPV	m1
7	ReadingTime	1.61	01_NPV	m1
7	Removed Columns	32681	01_NPV	m1
7	Removed Rows	392	01_NPV	m1
8	After Columns	54959	01_NPV	m2
8	After NonZeros	172361	01_NPV	m2
8	After Rows	2530	01_NPV	m2
8	Before Columns	147800	01_NPV	m2
8	Before NonZeros	1342663	01_NPV	m2
8	Before Rows	64342	01_NPV	m2
8	PresolveTime	0.18	01_NPV	m2
8	ReadingTime	0.91	01_NPV	m2
8	Removed Columns	92841	01_NPV	m2
8	Removed Rows	61812	01_NPV	m2
9	After Columns	54959	01_NPV	m3
9	After NonZeros	172361	01_NPV	m3
9	After Rows	2530	01_NPV	m3
9	Before Columns	426254	01_NPV	m3
9	Before NonZeros	1423744	01_NPV	m3
9	Before Rows	342796	01_NPV	m3
9	PresolveTime	0.51	01_NPV	m3
9	ReadingTime	1.1	01_NPV	m3
9	Removed Columns	371295	01_NPV	m3
9	Removed Rows	340266	01_NPV	m3
10	After Columns	76336	02_Carbon	m1
10	After NonZeros	1371451	02_Carbon	m1
10	After Rows	438	02_Carbon	m1
10	Before Columns	84282	02_Carbon	m1
10	Before NonZeros	5617575	02_Carbon	m1
10	Before Rows	837	02_Carbon	m1
10	PresolveTime	0.5	02_Carbon	m1
10	ReadingTime	3.7	02_Carbon	m1
10	Removed Columns	7946	02_Carbon	m1
10	Removed Rows	399	02_Carbon	m1
11	After Columns	88086	02_Carbon	m2
11	After NonZeros	1050952	02_Carbon	m2
11	After Rows	12188	02_Carbon	m2
11	Before Columns	147821	02_Carbon	m2
11	Before NonZeros	2981836	02_Carbon	m2
11	Before Rows	64376	02_Carbon	m2
11	PresolveTime	0.46	02_Carbon	m2
11	ReadingTime	1.99	02_Carbon	m2
11	Removed Columns	59735	02_Carbon	m2
11	Removed Rows	52188	02_Carbon	m2
12	After Columns	90947	02_Carbon	m3
12	After NonZeros	638231	02_Carbon	m3
12	After Rows	15049	02_Carbon	m3
12	Before Columns	426275	02_Carbon	m3
12	Before NonZeros	2111263	02_Carbon	m3
12	Before Rows	342830	02_Carbon	m3
12	PresolveTime	0.9	02_Carbon	m3
12	ReadingTime	1.66	02_Carbon	m3
12	Removed Columns	335328	02_Carbon	m3
12	Removed Rows	327781	02_Carbon	m3
13	After Columns	76357	03_Water1	m1
13	After NonZeros	2739328	03_Water1	m1
13	After Rows	479	03_Water1	m1
13	Before Columns	84303	03_Water1	m1
13	Before NonZeros	7114526	03_Water1	m1
13	Before Rows	878	03_Water1	m1
13	PresolveTime	0.71	03_Water1	m1
13	ReadingTime	4.5	03_Water1	m1
13	Removed Columns	7946	03_Water1	m1
13	Removed Rows	399	03_Water1	m1
14	After Columns	94185	03_Water1	m2
14	After NonZeros	1803057	03_Water1	m2
14	After Rows	18307	03_Water1	m2
14	Before Columns	147842	03_Water1	m2
14	Before NonZeros	3798408	03_Water1	m2
14	Before Rows	64417	03_Water1	m2
14	PresolveTime	0.62	03_Water1	m2
14	ReadingTime	2.42	03_Water1	m2
14	Removed Columns	53657	03_Water1	m2
14	Removed Rows	46110	03_Water1	m2
15	After Columns	91714	03_Water1	m3
15	After NonZeros	1103883	03_Water1	m3
15	After Rows	15836	03_Water1	m3
15	Before Columns	426296	03_Water1	m3
15	Before NonZeros	2452008	03_Water1	m3
15	Before Rows	342871	03_Water1	m3
15	PresolveTime	1.45	03_Water1	m3
15	ReadingTime	1.78	03_Water1	m3
15	Removed Columns	334582	03_Water1	m3
15	Removed Rows	327035	03_Water1	m3
16	After Columns	76336	03_Water2	m1
16	After NonZeros	2293710	03_Water2	m1
16	After Rows	625	03_Water2	m1
16	Before Columns	84471	03_Water2	m1
16	Before NonZeros	6631646	03_Water2	m1
16	Before Rows	1215	03_Water2	m1
16	PresolveTime	0.71	03_Water2	m1
16	ReadingTime	4.01	03_Water2	m1
16	Removed Columns	8135	03_Water2	m1
16	Removed Rows	590	03_Water2	m1
17	After Columns	91848	03_Water2	m2
17	After NonZeros	1553966	03_Water2	m2
17	After Rows	16138	03_Water2	m2
17	Before Columns	148010	03_Water2	m2
17	Before NonZeros	3518728	03_Water2	m2
17	Before Rows	64754	03_Water2	m2
17	PresolveTime	0.58	03_Water2	m2
17	ReadingTime	2.18	03_Water2	m2
17	Removed Columns	56162	03_Water2	m2
17	Removed Rows	48616	03_Water2	m2
18	After Columns	91944	03_Water2	m3
18	After NonZeros	921878	03_Water2	m3
18	After Rows	16230	03_Water2	m3
18	Before Columns	426464	03_Water2	m3
18	Before NonZeros	2335444	03_Water2	m3
18	Before Rows	343208	03_Water2	m3
18	PresolveTime	1.03	03_Water2	m3
18	ReadingTime	1.68	03_Water2	m3
18	Removed Columns	334520	03_Water2	m3
18	Removed Rows	326978	03_Water2	m3
19	After Columns	76357	03_Water	m1
19	After NonZeros	3661587	03_Water	m1
19	After Rows	666	03_Water	m1
19	Before Columns	84492	03_Water	m1
19	Before NonZeros	8128597	03_Water	m1
19	Before Rows	1256	03_Water	m1
19	PresolveTime	1	03_Water	m1
19	ReadingTime	4.69	03_Water	m1
19	Removed Columns	8135	03_Water	m1
19	Removed Rows	590	03_Water	m1
20	After Columns	98265	03_Water	m2
20	After NonZeros	2272978	03_Water	m2
20	After Rows	22575	03_Water	m2
20	Before Columns	148031	03_Water	m2
20	Before NonZeros	4335300	03_Water	m2
20	Before Rows	64795	03_Water	m2
20	PresolveTime	0.74	03_Water	m2
20	ReadingTime	2.62	03_Water	m2
20	Removed Columns	49766	03_Water	m2
20	Removed Rows	42220	03_Water	m2
21	After Columns	98907	03_Water	m3
21	After NonZeros	1241941	03_Water	m3
21	After Rows	23213	03_Water	m3
21	Before Columns	426485	03_Water	m3
21	Before NonZeros	2676189	03_Water	m3
21	Before Rows	343249	03_Water	m3
21	PresolveTime	1.48	03_Water	m3
21	ReadingTime	1.88	03_Water	m3
21	Removed Columns	327578	03_Water	m3
21	Removed Rows	320036	03_Water	m3
22	After Columns	51580	01_NPV_Inv	m1
22	After NonZeros	213781	01_NPV_Inv	m1
22	After Rows	411	01_NPV_Inv	m1
22	Before Columns	84282	01_NPV_Inv	m1
22	Before NonZeros	3934135	01_NPV_Inv	m1
22	Before Rows	824	01_NPV_Inv	m1
22	PresolveTime	0.24	01_NPV_Inv	m1
22	ReadingTime	2.45	01_NPV_Inv	m1
22	Removed Columns	32702	01_NPV_Inv	m1
22	Removed Rows	413	01_NPV_Inv	m1
23	After Columns	54959	01_NPV_Inv	m2
23	After NonZeros	172361	01_NPV_Inv	m2
23	After Rows	2530	01_NPV_Inv	m2
23	Before Columns	147821	01_NPV_Inv	m2
23	Before NonZeros	2159195	01_NPV_Inv	m2
23	Before Rows	64363	01_NPV_Inv	m2
23	PresolveTime	0.25	01_NPV_Inv	m2
23	ReadingTime	1.38	01_NPV_Inv	m2
23	Removed Columns	92862	01_NPV_Inv	m2
23	Removed Rows	61833	01_NPV_Inv	m2
24	After Columns	54959	01_NPV_Inv	m3
24	After NonZeros	172361	01_NPV_Inv	m3
24	After Rows	2530	01_NPV_Inv	m3
24	Before Columns	426275	01_NPV_Inv	m3
24	Before NonZeros	1764449	01_NPV_Inv	m3
24	Before Rows	342817	01_NPV_Inv	m3
24	PresolveTime	0.53	01_NPV_Inv	m3
24	ReadingTime	1.33	01_NPV_Inv	m3
24	Removed Columns	371316	01_NPV_Inv	m3
24	Removed Rows	340287	01_NPV_Inv	m3
25	After Columns	76336	02_Carbon_Inv	m1
25	After NonZeros	1371451	02_Carbon_Inv	m1
25	After Rows	438	02_Carbon_Inv	m1
25	Before Columns	84303	02_Carbon_Inv	m1
25	Before NonZeros	7114486	02_Carbon_Inv	m1
25	Before Rows	858	02_Carbon_Inv	m1
25	PresolveTime	0.51	02_Carbon_Inv	m1
25	ReadingTime	4.62	02_Carbon_Inv	m1
25	Removed Columns	7967	02_Carbon_Inv	m1
25	Removed Rows	420	02_Carbon_Inv	m1
26	After Columns	88086	02_Carbon_Inv	m2
26	After NonZeros	1050952	02_Carbon_Inv	m2
26	After Rows	12188	02_Carbon_Inv	m2
26	Before Columns	147842	02_Carbon_Inv	m2
26	Before NonZeros	3798368	02_Carbon_Inv	m2
26	Before Rows	64397	02_Carbon_Inv	m2
26	PresolveTime	0.47	02_Carbon_Inv	m2
26	ReadingTime	2.43	02_Carbon_Inv	m2
26	Removed Columns	59756	02_Carbon_Inv	m2
26	Removed Rows	52209	02_Carbon_Inv	m2
27	After Columns	90947	02_Carbon_Inv	m3
27	After NonZeros	638231	02_Carbon_Inv	m3
27	After Rows	15049	02_Carbon_Inv	m3
27	Before Columns	426296	02_Carbon_Inv	m3
27	Before NonZeros	2451968	02_Carbon_Inv	m3
27	Before Rows	342851	02_Carbon_Inv	m3
27	PresolveTime	0.84	02_Carbon_Inv	m3
27	ReadingTime	1.78	02_Carbon_Inv	m3
27	Removed Columns	335349	02_Carbon_Inv	m3
27	Removed Rows	327802	02_Carbon_Inv	m3
28	After Columns	76357	03_Water_Inv	m1
28	After NonZeros	3661587	03_Water_Inv	m1
28	After Rows	666	03_Water_Inv	m1
28	Before Columns	84513	03_Water_Inv	m1
28	Before NonZeros	9625508	03_Water_Inv	m1
28	Before Rows	1277	03_Water_Inv	m1
28	PresolveTime	1.04	03_Water_Inv	m1
28	ReadingTime	6.08	03_Water_Inv	m1
28	Removed Columns	8156	03_Water_Inv	m1
28	Removed Rows	611	03_Water_Inv	m1
29	After Columns	98265	03_Water_Inv	m2
29	After NonZeros	2272978	03_Water_Inv	m2
29	After Rows	22575	03_Water_Inv	m2
29	Before Columns	148052	03_Water_Inv	m2
29	Before NonZeros	5151832	03_Water_Inv	m2
29	Before Rows	64816	03_Water_Inv	m2
29	PresolveTime	0.78	03_Water_Inv	m2
29	ReadingTime	3.06	03_Water_Inv	m2
29	Removed Columns	49787	03_Water_Inv	m2
29	Removed Rows	42241	03_Water_Inv	m2
30	After Columns	98907	03_Water_Inv	m3
30	After NonZeros	1241941	03_Water_Inv	m3
30	After Rows	23213	03_Water_Inv	m3
30	Before Columns	426506	03_Water_Inv	m3
30	Before NonZeros	3016894	03_Water_Inv	m3
30	Before Rows	343270	03_Water_Inv	m3
30	PresolveTime	1.46	03_Water_Inv	m3
30	ReadingTime	2.09	03_Water_Inv	m3
30	Removed Columns	327599	03_Water_Inv	m3
30	Removed Rows	320057	03_Water_Inv	m3

## Sheet: ProcControl
idProc	LogRun	Module	Scenario	ModelType	ProcFunction	ParamControl	Accounting Variable	TimeProc	ReadableTime	ElapsedTime
1	1	iMath	01_Inventory	m1	Connect to Database			1.70054e+09	Mon Nov 20 22:21:11 2023	0.153971		Scenario	03_Water
2	1	iMath	01_Inventory	m1	GetData	reading nodes and creating memory dics		1.70054e+09	Mon Nov 20 22:21:21 2023	9.88507
3	1	iMath	01_Inventory	m1	GetData	getting all sets but VarNodes:		1.70054e+09	Mon Nov 20 22:21:21 2023	0.0963221		Sum of ElapsedTime		ModelType
4	1	iMath	01_Inventory	m1	GetData	getting VarNodes		1.70054e+09	Mon Nov 20 22:21:21 2023	0.0741198		ProcFunction	ParamControl	m1	m2	m3
5	1	iMath	01_Inventory	m1	GetData	mDB.GetNodes		1.70054e+09	Mon Nov 20 22:21:23 2023	2.06126		Connect to Database	(blank)	0.153407	0.15187	0.154061
6	1	iMath	01_Inventory	m1	GetData	mDB.GetTreeGraph		1.70054e+09	Mon Nov 20 22:21:24 2023	0.0964453		GetData	getting all sets but VarNodes:	0.137413	0.155482	0.160376
7	1	iMath	01_Inventory	m1	GetData total time			1.70054e+09	Mon Nov 20 22:21:24 2023	13.1676			getting VarNodes	0.0844922	0.131405	0.25002
8	1	iMath	01_Inventory	m1	Model Building	look-up tables preparation		1.70054e+09	Mon Nov 20 22:21:24 2023	0.00679684			mDB.GetNodes	2.09365	0.905602	0.405658
9	1	iMath	01_Inventory	m1	Model Building	sets declaration		1.70054e+09	Mon Nov 20 22:21:25 2023	0.214158			mDB.GetTreeGraph	0.10796	0.203052	0.817981
10	1	iMath	01_Inventory	m1	Model Building	params declaration		1.70054e+09	Mon Nov 20 22:21:27 2023	2.74803			reading nodes and creating memory dics	7.45721	7.43879	7.8214
11	1	iMath	01_Inventory	m1	Model Building	Conservation of area declaration		1.70054e+09	Mon Nov 20 22:21:28 2023	0.745658		GetData total time	(blank)	11.2896	9.8706	10.5309
12	1	iMath	01_Inventory	m1	Model Building	Accounting Var VolCut	cAcctVolCut	1.70054e+09	Mon Nov 20 22:21:42 2023	14.186		Model Building	Accounting Var AgeControl	16.2422	8.3436	4.59504
13	1	iMath	01_Inventory	m1	Model Building	Accounting Var DscTmbCst	cAcctDscTmbCst	1.70054e+09	Mon Nov 20 22:21:57 2023	14.9037			Accounting Var CRemoved	15.7138	6.27238	2.93121
14	1	iMath	01_Inventory	m1	Model Building	Accounting Var DscTmbRev	cAcctDscTmbRev	1.70054e+09	Mon Nov 20 22:22:11 2023	13.9843			Accounting Var DscCosts	17.6649	6.22682	2.9596
15	1	iMath	01_Inventory	m1	Model Building	Accounting Var Inventory	cAcctInventory	1.70054e+09	Mon Nov 20 22:22:26 2023	14.7291			Accounting Var DscRevenue	15.2366	9.50084	2.93561
16	1	iMath	01_Inventory	m1	Model Building	RHS declaration		1.70054e+09	Mon Nov 20 22:22:26 2023	0			Accounting Var PltCover	97.5987	40.9534	18.2752
17	1	iMath	01_Inventory	m1	Model Building	Constraints		1.70054e+09	Mon Nov 20 22:22:26 2023	0			Accounting Var VolCut	14.1193	6.28903	3.02903
18	1	iMath	01_Inventory	m1	Model Building	Objectives		1.70054e+09	Mon Nov 20 22:22:26 2023	0			Conservation of area declaration	0.642087	1.18251	7.6485
19	1	iMath	01_Inventory	m1	Model Building - total time			1.70054e+09	Mon Nov 20 22:22:26 2023	61.5177			Constraints	0.000987291	0.00199366	0.00100923
20	1	iMath	01_Inventory	m1	Solve the model			1.70054e+09	Mon Nov 20 22:22:38 2023	11.6714			look-up tables preparation	0.00704408	0.0149419	0.0319731
22	1	iMath	01_Inventory	m1	Model Measurements			1.70054e+09	Mon Nov 20 22:22:44 2023	5.56053			Objectives	0	0	0.00131893
23	2	iMath	01_Inventory	m2	Connect to Database			1.70054e+09	Mon Nov 20 22:22:56 2023	0.152129			params declaration	5.51408	5.57146	5.58557
24	2	iMath	01_Inventory	m2	GetData	reading nodes and creating memory dics		1.70054e+09	Mon Nov 20 22:23:05 2023	8.91885			RHS declaration	0	0	0
25	2	iMath	01_Inventory	m2	GetData	getting all sets but VarNodes:		1.70054e+09	Mon Nov 20 22:23:05 2023	0.0971606			sets declaration	0.235614	0.390022	1.05662
26	2	iMath	01_Inventory	m2	GetData	getting VarNodes		1.70054e+09	Mon Nov 20 22:23:05 2023	0.11472		Model Building - total time	(blank)	182.975	84.7471	49.0507
27	2	iMath	01_Inventory	m2	GetData	mDB.GetNodes		1.70054e+09	Mon Nov 20 22:23:06 2023	0.83845		Model Measurements	(blank)	7.57537	6.20599	5.44661
28	2	iMath	01_Inventory	m2	GetData	mDB.GetTreeGraph		1.70054e+09	Mon Nov 20 22:23:07 2023	0.798847		Solve the model	(blank)	26.5419	20.3502	22.0607
29	2	iMath	01_Inventory	m2	GetData total time			1.70054e+09	Mon Nov 20 22:23:08 2023	11.7546
30	2	iMath	01_Inventory	m2	Model Building	look-up tables preparation		1.70054e+09	Mon Nov 20 22:23:08 2023	0.0112729
31	2	iMath	01_Inventory	m2	Model Building	sets declaration		1.70054e+09	Mon Nov 20 22:23:08 2023	0.391636
32	2	iMath	01_Inventory	m2	Model Building	params declaration		1.70054e+09	Mon Nov 20 22:23:11 2023	2.94762
33	2	iMath	01_Inventory	m2	Model Building	Conservation of area declaration		1.70054e+09	Mon Nov 20 22:23:12 2023	1.14394
34	2	iMath	01_Inventory	m2	Model Building	Accounting Var VolCut	cAcctVolCut	1.70054e+09	Mon Nov 20 22:23:18 2023	5.92652
35	2	iMath	01_Inventory	m2	Model Building	Accounting Var DscTmbCst	cAcctDscTmbCst	1.70054e+09	Mon Nov 20 22:23:25 2023	6.5713
36	2	iMath	01_Inventory	m2	Model Building	Accounting Var DscTmbRev	cAcctDscTmbRev	1.70054e+09	Mon Nov 20 22:23:31 2023	5.95784
37	2	iMath	01_Inventory	m2	Model Building	Accounting Var Inventory	cAcctInventory	1.70054e+09	Mon Nov 20 22:23:37 2023	5.85909
38	2	iMath	01_Inventory	m2	Model Building	RHS declaration		1.70054e+09	Mon Nov 20 22:23:37 2023	0
39	2	iMath	01_Inventory	m2	Model Building	Constraints		1.70054e+09	Mon Nov 20 22:23:37 2023	0
40	2	iMath	01_Inventory	m2	Model Building	Objectives		1.70054e+09	Mon Nov 20 22:23:37 2023	0.000997782
41	2	iMath	01_Inventory	m2	Model Building - total time			1.70054e+09	Mon Nov 20 22:23:37 2023	28.8113
42	2	iMath	01_Inventory	m2	Solve the model			1.70054e+09	Mon Nov 20 22:23:46 2023	9.30054
44	2	iMath	01_Inventory	m2	Model Measurements			1.70054e+09	Mon Nov 20 22:23:53 2023	6.21131
45	3	iMath	01_Inventory	m3	Connect to Database			1.70054e+09	Mon Nov 20 22:24:03 2023	0.152798
46	3	iMath	01_Inventory	m3	GetData	reading nodes and creating memory dics		1.70054e+09	Mon Nov 20 22:24:10 2023	6.51289
47	3	iMath	01_Inventory	m3	GetData	getting all sets but VarNodes:		1.70054e+09	Mon Nov 20 22:24:10 2023	0.114755
48	3	iMath	01_Inventory	m3	GetData	getting VarNodes		1.70054e+09	Mon Nov 20 22:24:10 2023	0.222829
49	3	iMath	01_Inventory	m3	GetData	mDB.GetNodes		1.70054e+09	Mon Nov 20 22:24:10 2023	0.355647
50	3	iMath	01_Inventory	m3	GetData	mDB.GetTreeGraph		1.70054e+09	Mon Nov 20 22:24:12 2023	1.19826
51	3	iMath	01_Inventory	m3	GetData total time			1.70054e+09	Mon Nov 20 22:24:12 2023	9.40893
52	3	iMath	01_Inventory	m3	Model Building	look-up tables preparation		1.70054e+09	Mon Nov 20 22:24:13 2023	0.0314438
53	3	iMath	01_Inventory	m3	Model Building	sets declaration		1.70054e+09	Mon Nov 20 22:24:14 2023	1.02672
54	3	iMath	01_Inventory	m3	Model Building	params declaration		1.70054e+09	Mon Nov 20 22:24:16 2023	2.85131
55	3	iMath	01_Inventory	m3	Model Building	Conservation of area declaration		1.70054e+09	Mon Nov 20 22:24:21 2023	5.00594
56	3	iMath	01_Inventory	m3	Model Building	Accounting Var VolCut	cAcctVolCut	1.70054e+09	Mon Nov 20 22:24:24 2023	2.54046
57	3	iMath	01_Inventory	m3	Model Building	Accounting Var DscTmbCst	cAcctDscTmbCst	1.70054e+09	Mon Nov 20 22:24:26 2023	2.46393
58	3	iMath	01_Inventory	m3	Model Building	Accounting Var DscTmbRev	cAcctDscTmbRev	1.70054e+09	Mon Nov 20 22:24:29 2023	2.58511
59	3	iMath	01_Inventory	m3	Model Building	Accounting Var Inventory	cAcctInventory	1.70054e+09	Mon Nov 20 22:24:32 2023	2.57723
60	3	iMath	01_Inventory	m3	Model Building	RHS declaration		1.70054e+09	Mon Nov 20 22:24:32 2023	0
61	3	iMath	01_Inventory	m3	Model Building	Constraints		1.70054e+09	Mon Nov 20 22:24:32 2023	0.000999928
62	3	iMath	01_Inventory	m3	Model Building	Objectives		1.70054e+09	Mon Nov 20 22:24:32 2023	0
63	3	iMath	01_Inventory	m3	Model Building - total time			1.70054e+09	Mon Nov 20 22:24:32 2023	19.0831
64	3	iMath	01_Inventory	m3	Solve the model			1.70054e+09	Mon Nov 20 22:24:47 2023	15.0488
66	3	iMath	01_Inventory	m3	Model Measurements			1.70054e+09	Mon Nov 20 22:24:53 2023	4.61532
67	4	iMath	00_OnlyVolume	m1	Connect to Database			1.70054e+09	Mon Nov 20 22:25:04 2023	0.156301
68	4	iMath	00_OnlyVolume	m1	GetData	reading nodes and creating memory dics		1.70054e+09	Mon Nov 20 22:25:10 2023	6.05973
69	4	iMath	00_OnlyVolume	m1	GetData	getting all sets but VarNodes:		1.70054e+09	Mon Nov 20 22:25:10 2023	0.141036
70	4	iMath	00_OnlyVolume	m1	GetData	getting VarNodes		1.70054e+09	Mon Nov 20 22:25:10 2023	0.0907075
71	4	iMath	00_OnlyVolume	m1	GetData	mDB.GetNodes		1.70054e+09	Mon Nov 20 22:25:12 2023	2.04264
72	4	iMath	00_OnlyVolume	m1	GetData	mDB.GetTreeGraph		1.70054e+09	Mon Nov 20 22:25:12 2023	0.112571
73	4	iMath	00_OnlyVolume	m1	GetData total time			1.70054e+09	Mon Nov 20 22:25:13 2023	9.50062
74	4	iMath	00_OnlyVolume	m1	Model Building	look-up tables preparation		1.70054e+09	Mon Nov 20 22:25:13 2023	0.00498629
75	4	iMath	00_OnlyVolume	m1	Model Building	sets declaration		1.70054e+09	Mon Nov 20 22:25:13 2023	0.215544
76	4	iMath	00_OnlyVolume	m1	Model Building	params declaration		1.70054e+09	Mon Nov 20 22:25:14 2023	0.726725
77	4	iMath	00_OnlyVolume	m1	Model Building	Conservation of area declaration		1.70054e+09	Mon Nov 20 22:25:15 2023	0.620147
78	4	iMath	00_OnlyVolume	m1	Model Building	Accounting Var VolCut	cAcctVolCut	1.70054e+09	Mon Nov 20 22:25:29 2023	14.0209
79	4	iMath	00_OnlyVolume	m1	Model Building	Accounting Var DscTmbRev	cAcctDscTmbRev	1.70054e+09	Mon Nov 20 22:25:44 2023	14.8819
80	4	iMath	00_OnlyVolume	m1	Model Building	RHS declaration		1.70054e+09	Mon Nov 20 22:25:44 2023	0
81	4	iMath	00_OnlyVolume	m1	Model Building	Constraints		1.70054e+09	Mon Nov 20 22:25:44 2023	0.000996828
82	4	iMath	00_OnlyVolume	m1	Model Building	Objectives		1.70054e+09	Mon Nov 20 22:25:44 2023	0
83	4	iMath	00_OnlyVolume	m1	Model Building - total time			1.70054e+09	Mon Nov 20 22:25:44 2023	30.4712
84	4	iMath	00_OnlyVolume	m1	Solve the model			1.70054e+09	Mon Nov 20 22:25:47 2023	3.24479
86	4	iMath	00_OnlyVolume	m1	Model Measurements			1.70054e+09	Mon Nov 20 22:25:51 2023	3.43841
87	5	iMath	00_OnlyVolume	m2	Connect to Database			1.70054e+09	Mon Nov 20 22:26:01 2023	0.15446
88	5	iMath	00_OnlyVolume	m2	GetData	reading nodes and creating memory dics		1.70054e+09	Mon Nov 20 22:26:12 2023	10.2623
89	5	iMath	00_OnlyVolume	m2	GetData	getting all sets but VarNodes:		1.70054e+09	Mon Nov 20 22:26:12 2023	0.11813
90	5	iMath	00_OnlyVolume	m2	GetData	getting VarNodes		1.70054e+09	Mon Nov 20 22:26:12 2023	0.114839
91	5	iMath	00_OnlyVolume	m2	GetData	mDB.GetNodes		1.70054e+09	Mon Nov 20 22:26:13 2023	0.919186
92	5	iMath	00_OnlyVolume	m2	GetData	mDB.GetTreeGraph		1.70054e+09	Mon Nov 20 22:26:13 2023	0.16853
93	5	iMath	00_OnlyVolume	m2	GetData total time			1.70054e+09	Mon Nov 20 22:26:14 2023	12.5997
94	5	iMath	00_OnlyVolume	m2	Model Building	look-up tables preparation		1.70054e+09	Mon Nov 20 22:26:14 2023	0.0084002
95	5	iMath	00_OnlyVolume	m2	Model Building	sets declaration		1.70054e+09	Mon Nov 20 22:26:14 2023	0.346887
96	5	iMath	00_OnlyVolume	m2	Model Building	params declaration		1.70054e+09	Mon Nov 20 22:26:15 2023	0.697307
97	5	iMath	00_OnlyVolume	m2	Model Building	Conservation of area declaration		1.70054e+09	Mon Nov 20 22:26:18 2023	3.0237
98	5	iMath	00_OnlyVolume	m2	Model Building	Accounting Var VolCut	cAcctVolCut	1.70054e+09	Mon Nov 20 22:26:24 2023	6.19341
99	5	iMath	00_OnlyVolume	m2	Model Building	Accounting Var DscTmbRev	cAcctDscTmbRev	1.70054e+09	Mon Nov 20 22:26:30 2023	6.19848
100	5	iMath	00_OnlyVolume	m2	Model Building	RHS declaration		1.70054e+09	Mon Nov 20 22:26:30 2023	0
101	5	iMath	00_OnlyVolume	m2	Model Building	Constraints		1.70054e+09	Mon Nov 20 22:26:30 2023	0
102	5	iMath	00_OnlyVolume	m2	Model Building	Objectives		1.70054e+09	Mon Nov 20 22:26:30 2023	0.00100279
103	5	iMath	00_OnlyVolume	m2	Model Building - total time			1.70054e+09	Mon Nov 20 22:26:30 2023	16.4702
104	5	iMath	00_OnlyVolume	m2	Solve the model			1.70054e+09	Mon Nov 20 22:26:34 2023	3.75176
106	5	iMath	00_OnlyVolume	m2	Model Measurements			1.70054e+09	Mon Nov 20 22:26:37 2023	3.06595
107	6	iMath	00_OnlyVolume	m3	Connect to Database			1.70054e+09	Mon Nov 20 22:26:48 2023	0.158716
108	6	iMath	00_OnlyVolume	m3	GetData	reading nodes and creating memory dics		1.70054e+09	Mon Nov 20 22:26:55 2023	6.89631
109	6	iMath	00_OnlyVolume	m3	GetData	getting all sets but VarNodes:		1.70054e+09	Mon Nov 20 22:26:55 2023	0.140979
110	6	iMath	00_OnlyVolume	m3	GetData	getting VarNodes		1.70054e+09	Mon Nov 20 22:26:55 2023	0.25355
111	6	iMath	00_OnlyVolume	m3	GetData	mDB.GetNodes		1.70054e+09	Mon Nov 20 22:26:55 2023	0.371499
112	6	iMath	00_OnlyVolume	m3	GetData	mDB.GetTreeGraph		1.70054e+09	Mon Nov 20 22:26:56 2023	1.07146
113	6	iMath	00_OnlyVolume	m3	GetData total time			1.70054e+09	Mon Nov 20 22:26:57 2023	9.76001
114	6	iMath	00_OnlyVolume	m3	Model Building	look-up tables preparation		1.70054e+09	Mon Nov 20 22:26:57 2023	0.0318317
115	6	iMath	00_OnlyVolume	m3	Model Building	sets declaration		1.70054e+09	Mon Nov 20 22:26:58 2023	1.04363
116	6	iMath	00_OnlyVolume	m3	Model Building	params declaration		1.70054e+09	Mon Nov 20 22:26:59 2023	0.673873
117	6	iMath	00_OnlyVolume	m3	Model Building	Conservation of area declaration		1.70054e+09	Mon Nov 20 22:27:04 2023	5.02587
118	6	iMath	00_OnlyVolume	m3	Model Building	Accounting Var VolCut	cAcctVolCut	1.70054e+09	Mon Nov 20 22:27:08 2023	3.45041
119	6	iMath	00_OnlyVolume	m3	Model Building	Accounting Var DscTmbRev	cAcctDscTmbRev	1.70054e+09	Mon Nov 20 22:27:10 2023	2.70829
120	6	iMath	00_OnlyVolume	m3	Model Building	RHS declaration		1.70054e+09	Mon Nov 20 22:27:10 2023	0
121	6	iMath	00_OnlyVolume	m3	Model Building	Constraints		1.70054e+09	Mon Nov 20 22:27:10 2023	0
122	6	iMath	00_OnlyVolume	m3	Model Building	Objectives		1.70054e+09	Mon Nov 20 22:27:10 2023	0.000588655
123	6	iMath	00_OnlyVolume	m3	Model Building - total time			1.70054e+09	Mon Nov 20 22:27:10 2023	12.9355
124	6	iMath	00_OnlyVolume	m3	Solve the model			1.70054e+09	Mon Nov 20 22:27:21 2023	10.3993
126	6	iMath	00_OnlyVolume	m3	Model Measurements			1.70054e+09	Mon Nov 20 22:27:24 2023	2.96762
127	7	iMath	01_NPV	m1	Connect to Database			1.70054e+09	Mon Nov 20 22:27:35 2023	0.15393
128	7	iMath	01_NPV	m1	GetData	reading nodes and creating memory dics		1.70054e+09	Mon Nov 20 22:27:42 2023	6.39121
129	7	iMath	01_NPV	m1	GetData	getting all sets but VarNodes:		1.70054e+09	Mon Nov 20 22:27:42 2023	0.116909
130	7	iMath	01_NPV	m1	GetData	getting VarNodes		1.70054e+09	Mon Nov 20 22:27:42 2023	0.10464
131	7	iMath	01_NPV	m1	GetData	mDB.GetNodes		1.70054e+09	Mon Nov 20 22:27:44 2023	2.02945
132	7	iMath	01_NPV	m1	GetData	mDB.GetTreeGraph		1.70054e+09	Mon Nov 20 22:27:44 2023	0.114412
133	7	iMath	01_NPV	m1	GetData total time			1.70054e+09	Mon Nov 20 22:27:45 2023	9.82716
134	7	iMath	01_NPV	m1	Model Building	look-up tables preparation		1.70054e+09	Mon Nov 20 22:27:45 2023	0.00625443
135	7	iMath	01_NPV	m1	Model Building	sets declaration		1.70054e+09	Mon Nov 20 22:27:45 2023	0.231735
136	7	iMath	01_NPV	m1	Model Building	params declaration		1.70054e+09	Mon Nov 20 22:27:47 2023	1.85802
137	7	iMath	01_NPV	m1	Model Building	Conservation of area declaration		1.70054e+09	Mon Nov 20 22:27:49 2023	1.6472
138	7	iMath	01_NPV	m1	Model Building	Accounting Var VolCut	cAcctVolCut	1.70054e+09	Mon Nov 20 22:28:03 2023	13.9729
139	7	iMath	01_NPV	m1	Model Building	Accounting Var DscTmbCst	cAcctDscTmbCst	1.70054e+09	Mon Nov 20 22:28:18 2023	15.2994
140	7	iMath	01_NPV	m1	Model Building	Accounting Var DscTmbRev	cAcctDscTmbRev	1.70054e+09	Mon Nov 20 22:28:32 2023	14.2743
141	7	iMath	01_NPV	m1	Model Building	RHS declaration		1.70054e+09	Mon Nov 20 22:28:32 2023	0
142	7	iMath	01_NPV	m1	Model Building	Constraints		1.70054e+09	Mon Nov 20 22:28:32 2023	0
143	7	iMath	01_NPV	m1	Model Building	Objectives		1.70054e+09	Mon Nov 20 22:28:32 2023	0
144	7	iMath	01_NPV	m1	Model Building - total time			1.70054e+09	Mon Nov 20 22:28:32 2023	47.2919
145	7	iMath	01_NPV	m1	Solve the model			1.70054e+09	Mon Nov 20 22:28:41 2023	8.59691
147	7	iMath	01_NPV	m1	Model Measurements			1.70054e+09	Mon Nov 20 22:28:46 2023	4.3976
148	8	iMath	01_NPV	m2	Connect to Database			1.70054e+09	Mon Nov 20 22:28:56 2023	0.15263
149	8	iMath	01_NPV	m2	GetData	reading nodes and creating memory dics		1.70054e+09	Mon Nov 20 22:29:04 2023	7.95597
150	8	iMath	01_NPV	m2	GetData	getting all sets but VarNodes:		1.70054e+09	Mon Nov 20 22:29:04 2023	0.16708
151	8	iMath	01_NPV	m2	GetData	getting VarNodes		1.70054e+09	Mon Nov 20 22:29:04 2023	0.132459
152	8	iMath	01_NPV	m2	GetData	mDB.GetNodes		1.70054e+09	Mon Nov 20 22:29:05 2023	0.916042
153	8	iMath	01_NPV	m2	GetData	mDB.GetTreeGraph		1.70054e+09	Mon Nov 20 22:29:06 2023	0.193196
154	8	iMath	01_NPV	m2	GetData total time			1.70054e+09	Mon Nov 20 22:29:06 2023	10.4036
155	8	iMath	01_NPV	m2	Model Building	look-up tables preparation		1.70054e+09	Mon Nov 20 22:29:06 2023	0.00898242
156	8	iMath	01_NPV	m2	Model Building	sets declaration		1.70054e+09	Mon Nov 20 22:29:07 2023	0.379728
157	8	iMath	01_NPV	m2	Model Building	params declaration		1.70054e+09	Mon Nov 20 22:29:09 2023	1.87328
158	8	iMath	01_NPV	m2	Model Building	Conservation of area declaration		1.70054e+09	Mon Nov 20 22:29:10 2023	1.75723
159	8	iMath	01_NPV	m2	Model Building	Accounting Var VolCut	cAcctVolCut	1.70054e+09	Mon Nov 20 22:29:17 2023	6.30131
160	8	iMath	01_NPV	m2	Model Building	Accounting Var DscTmbCst	cAcctDscTmbCst	1.70054e+09	Mon Nov 20 22:29:24 2023	6.86781
161	8	iMath	01_NPV	m2	Model Building	Accounting Var DscTmbRev	cAcctDscTmbRev	1.70054e+09	Mon Nov 20 22:29:30 2023	6.26579
162	8	iMath	01_NPV	m2	Model Building	RHS declaration		1.70054e+09	Mon Nov 20 22:29:30 2023	0
163	8	iMath	01_NPV	m2	Model Building	Constraints		1.70054e+09	Mon Nov 20 22:29:30 2023	0
164	8	iMath	01_NPV	m2	Model Building	Objectives		1.70054e+09	Mon Nov 20 22:29:30 2023	0
165	8	iMath	01_NPV	m2	Model Building - total time			1.70054e+09	Mon Nov 20 22:29:30 2023	23.4541
166	8	iMath	01_NPV	m2	Solve the model			1.70054e+09	Mon Nov 20 22:29:36 2023	6.53839
168	8	iMath	01_NPV	m2	Model Measurements			1.70054e+09	Mon Nov 20 22:29:41 2023	4.26273
169	9	iMath	01_NPV	m3	Connect to Database			1.70054e+09	Mon Nov 20 22:29:52 2023	0.153449
170	9	iMath	01_NPV	m3	GetData	reading nodes and creating memory dics		1.70054e+09	Mon Nov 20 22:30:00 2023	7.71673
171	9	iMath	01_NPV	m3	GetData	getting all sets but VarNodes:		1.70054e+09	Mon Nov 20 22:30:00 2023	0.155376
172	9	iMath	01_NPV	m3	GetData	getting VarNodes		1.70054e+09	Mon Nov 20 22:30:00 2023	0.277823
173	9	iMath	01_NPV	m3	GetData	mDB.GetNodes		1.70054e+09	Mon Nov 20 22:30:00 2023	0.396483
174	9	iMath	01_NPV	m3	GetData	mDB.GetTreeGraph		1.70054e+09	Mon Nov 20 22:30:01 2023	0.748782
175	9	iMath	01_NPV	m3	GetData total time			1.70054e+09	Mon Nov 20 22:30:02 2023	10.3489
176	9	iMath	01_NPV	m3	Model Building	look-up tables preparation		1.70054e+09	Mon Nov 20 22:30:02 2023	0.0376346
177	9	iMath	01_NPV	m3	Model Building	sets declaration		1.70054e+09	Mon Nov 20 22:30:03 2023	1.04321
178	9	iMath	01_NPV	m3	Model Building	params declaration		1.70054e+09	Mon Nov 20 22:30:05 2023	1.8831
179	9	iMath	01_NPV	m3	Model Building	Conservation of area declaration		1.70054e+09	Mon Nov 20 22:30:11 2023	5.59387
180	9	iMath	01_NPV	m3	Model Building	Accounting Var VolCut	cAcctVolCut	1.70054e+09	Mon Nov 20 22:30:14 2023	2.93519
181	9	iMath	01_NPV	m3	Model Building	Accounting Var DscTmbCst	cAcctDscTmbCst	1.70054e+09	Mon Nov 20 22:30:16 2023	2.84598
182	9	iMath	01_NPV	m3	Model Building	Accounting Var DscTmbRev	cAcctDscTmbRev	1.70054e+09	Mon Nov 20 22:30:20 2023	3.83995
183	9	iMath	01_NPV	m3	Model Building	RHS declaration		1.70054e+09	Mon Nov 20 22:30:20 2023	0.0010016
184	9	iMath	01_NPV	m3	Model Building	Constraints		1.70054e+09	Mon Nov 20 22:30:20 2023	0
185	9	iMath	01_NPV	m3	Model Building	Objectives		1.70054e+09	Mon Nov 20 22:30:20 2023	0
186	9	iMath	01_NPV	m3	Model Building - total time			1.70054e+09	Mon Nov 20 22:30:20 2023	18.1799
187	9	iMath	01_NPV	m3	Solve the model			1.70054e+09	Mon Nov 20 22:30:33 2023	12.3237
189	9	iMath	01_NPV	m3	Model Measurements			1.70054e+09	Mon Nov 20 22:30:37 2023	3.75515
190	10	iMath	02_Carbon	m1	Connect to Database			1.70054e+09	Mon Nov 20 22:30:47 2023	0.151688
191	10	iMath	02_Carbon	m1	GetData	reading nodes and creating memory dics		1.70054e+09	Mon Nov 20 22:30:54 2023	6.75788
192	10	iMath	02_Carbon	m1	GetData	getting all sets but VarNodes:		1.70054e+09	Mon Nov 20 22:30:54 2023	0.127332
193	10	iMath	02_Carbon	m1	GetData	getting VarNodes		1.70054e+09	Mon Nov 20 22:30:54 2023	0.0944622
194	10	iMath	02_Carbon	m1	GetData	mDB.GetNodes		1.70054e+09	Mon Nov 20 22:30:57 2023	2.11156
195	10	iMath	02_Carbon	m1	GetData	mDB.GetTreeGraph		1.70054e+09	Mon Nov 20 22:30:57 2023	0.116341
196	10	iMath	02_Carbon	m1	GetData total time			1.70054e+09	Mon Nov 20 22:30:58 2023	10.5884
197	10	iMath	02_Carbon	m1	Model Building	look-up tables preparation		1.70054e+09	Mon Nov 20 22:30:58 2023	0.00726056
198	10	iMath	02_Carbon	m1	Model Building	sets declaration		1.70054e+09	Mon Nov 20 22:30:58 2023	0.214547
199	10	iMath	02_Carbon	m1	Model Building	params declaration		1.70054e+09	Mon Nov 20 22:31:02 2023	3.92937
200	10	iMath	02_Carbon	m1	Model Building	Conservation of area declaration		1.70054e+09	Mon Nov 20 22:31:03 2023	0.624113
201	10	iMath	02_Carbon	m1	Model Building	Accounting Var VolCut	cAcctVolCut	1.70054e+09	Mon Nov 20 22:31:17 2023	14.1123
202	10	iMath	02_Carbon	m1	Model Building	Accounting Var DscCosts	cAcctDscCosts	1.70054e+09	Mon Nov 20 22:31:33 2023	16.4925
203	10	iMath	02_Carbon	m1	Model Building	Accounting Var DscRevenue	cAcctDscRevenue	1.70054e+09	Mon Nov 20 22:31:49 2023	15.2769
204	10	iMath	02_Carbon	m1	Model Building	Accounting Var CRemoved	cAcctCRemoved	1.70054e+09	Mon Nov 20 22:32:06 2023	16.9965
205	10	iMath	02_Carbon	m1	Model Building	RHS declaration		1.70054e+09	Mon Nov 20 22:32:06 2023	0
206	10	iMath	02_Carbon	m1	Model Building	Constraints		1.70054e+09	Mon Nov 20 22:32:06 2023	0.0010004
207	10	iMath	02_Carbon	m1	Model Building	Objectives		1.70054e+09	Mon Nov 20 22:32:06 2023	0
208	10	iMath	02_Carbon	m1	Model Building - total time			1.70054e+09	Mon Nov 20 22:32:06 2023	67.6545
209	10	iMath	02_Carbon	m1	Solve the model			1.70054e+09	Mon Nov 20 22:32:26 2023	20.6398
211	10	iMath	02_Carbon	m1	Model Measurements			1.70054e+09	Mon Nov 20 22:32:32 2023	5.54483
212	11	iMath	02_Carbon	m2	Connect to Database			1.70054e+09	Mon Nov 20 22:32:43 2023	0.15223
213	11	iMath	02_Carbon	m2	GetData	reading nodes and creating memory dics		1.70054e+09	Mon Nov 20 22:32:50 2023	6.85365
214	11	iMath	02_Carbon	m2	GetData	getting all sets but VarNodes:		1.70054e+09	Mon Nov 20 22:32:51 2023	0.152101
215	11	iMath	02_Carbon	m2	GetData	getting VarNodes		1.70054e+09	Mon Nov 20 22:32:51 2023	0.12975
216	11	iMath	02_Carbon	m2	GetData	mDB.GetNodes		1.70054e+09	Mon Nov 20 22:32:52 2023	0.895881
217	11	iMath	02_Carbon	m2	GetData	mDB.GetTreeGraph		1.70054e+09	Mon Nov 20 22:32:52 2023	0.192554
218	11	iMath	02_Carbon	m2	GetData total time			1.70054e+09	Mon Nov 20 22:32:53 2023	9.25029
219	11	iMath	02_Carbon	m2	Model Building	look-up tables preparation		1.70054e+09	Mon Nov 20 22:32:53 2023	0.0137475
220	11	iMath	02_Carbon	m2	Model Building	sets declaration		1.70054e+09	Mon Nov 20 22:32:53 2023	0.388368
221	11	iMath	02_Carbon	m2	Model Building	params declaration		1.70054e+09	Mon Nov 20 22:32:57 2023	4.07341
222	11	iMath	02_Carbon	m2	Model Building	Conservation of area declaration		1.70054e+09	Mon Nov 20 22:32:58 2023	1.19403
223	11	iMath	02_Carbon	m2	Model Building	Accounting Var VolCut	cAcctVolCut	1.70054e+09	Mon Nov 20 22:33:05 2023	6.3028
224	11	iMath	02_Carbon	m2	Model Building	Accounting Var DscCosts	cAcctDscCosts	1.70054e+09	Mon Nov 20 22:33:11 2023	6.16574
225	11	iMath	02_Carbon	m2	Model Building	Accounting Var DscRevenue	cAcctDscRevenue	1.70054e+09	Mon Nov 20 22:33:19 2023	8.6199
226	11	iMath	02_Carbon	m2	Model Building	Accounting Var CRemoved	cAcctCRemoved	1.70054e+09	Mon Nov 20 22:33:26 2023	6.14782
227	11	iMath	02_Carbon	m2	Model Building	RHS declaration		1.70054e+09	Mon Nov 20 22:33:26 2023	0
228	11	iMath	02_Carbon	m2	Model Building	Constraints		1.70054e+09	Mon Nov 20 22:33:26 2023	0
229	11	iMath	02_Carbon	m2	Model Building	Objectives		1.70054e+09	Mon Nov 20 22:33:26 2023	0
230	11	iMath	02_Carbon	m2	Model Building - total time			1.70054e+09	Mon Nov 20 22:33:26 2023	32.9058
231	11	iMath	02_Carbon	m2	Solve the model			1.70054e+09	Mon Nov 20 22:33:39 2023	13.4444
233	11	iMath	02_Carbon	m2	Model Measurements			1.70054e+09	Mon Nov 20 22:33:44 2023	4.88684
234	12	iMath	02_Carbon	m3	Connect to Database			1.70054e+09	Mon Nov 20 22:33:57 2023	0.151212
235	12	iMath	02_Carbon	m3	GetData	reading nodes and creating memory dics		1.70054e+09	Mon Nov 20 22:34:07 2023	9.50947
236	12	iMath	02_Carbon	m3	GetData	getting all sets but VarNodes:		1.70054e+09	Mon Nov 20 22:34:07 2023	0.180483
237	12	iMath	02_Carbon	m3	GetData	getting VarNodes		1.70054e+09	Mon Nov 20 22:34:08 2023	0.274727
238	12	iMath	02_Carbon	m3	GetData	mDB.GetNodes		1.70054e+09	Mon Nov 20 22:34:08 2023	0.427799
239	12	iMath	02_Carbon	m3	GetData	mDB.GetTreeGraph		1.70054e+09	Mon Nov 20 22:34:09 2023	0.782632
240	12	iMath	02_Carbon	m3	GetData total time			1.70054e+09	Mon Nov 20 22:34:10 2023	12.2454
241	12	iMath	02_Carbon	m3	Model Building	look-up tables preparation		1.70054e+09	Mon Nov 20 22:34:10 2023	0.0379035
242	12	iMath	02_Carbon	m3	Model Building	sets declaration		1.70054e+09	Mon Nov 20 22:34:11 2023	1.07067
243	12	iMath	02_Carbon	m3	Model Building	params declaration		1.70054e+09	Mon Nov 20 22:34:15 2023	3.98165
244	12	iMath	02_Carbon	m3	Model Building	Conservation of area declaration		1.70054e+09	Mon Nov 20 22:34:20 2023	5.52378
245	12	iMath	02_Carbon	m3	Model Building	Accounting Var VolCut	cAcctVolCut	1.70054e+09	Mon Nov 20 22:34:23 2023	3.00181
246	12	iMath	02_Carbon	m3	Model Building	Accounting Var DscCosts	cAcctDscCosts	1.70054e+09	Mon Nov 20 22:34:26 2023	2.96803
247	12	iMath	02_Carbon	m3	Model Building	Accounting Var DscRevenue	cAcctDscRevenue	1.70054e+09	Mon Nov 20 22:34:29 2023	3.00379
248	12	iMath	02_Carbon	m3	Model Building	Accounting Var CRemoved	cAcctCRemoved	1.70054e+09	Mon Nov 20 22:34:34 2023	4.35305
249	12	iMath	02_Carbon	m3	Model Building	RHS declaration		1.70054e+09	Mon Nov 20 22:34:34 2023	0
250	12	iMath	02_Carbon	m3	Model Building	Constraints		1.70054e+09	Mon Nov 20 22:34:34 2023	0.000997066
251	12	iMath	02_Carbon	m3	Model Building	Objectives		1.70054e+09	Mon Nov 20 22:34:34 2023	0
252	12	iMath	02_Carbon	m3	Model Building - total time			1.70054e+09	Mon Nov 20 22:34:34 2023	23.9417
253	12	iMath	02_Carbon	m3	Solve the model			1.70054e+09	Mon Nov 20 22:34:52 2023	17.928
255	12	iMath	02_Carbon	m3	Model Measurements			1.70054e+09	Mon Nov 20 22:34:56 2023	4.24398
256	13	iMath	03_Water1	m1	Connect to Database			1.70054e+09	Mon Nov 20 22:35:07 2023	0.153651
257	13	iMath	03_Water1	m1	GetData	reading nodes and creating memory dics		1.70054e+09	Mon Nov 20 22:35:14 2023	7.34635
258	13	iMath	03_Water1	m1	GetData	getting all sets but VarNodes:		1.70054e+09	Mon Nov 20 22:35:14 2023	0.128927
259	13	iMath	03_Water1	m1	GetData	getting VarNodes		1.70054e+09	Mon Nov 20 22:35:15 2023	0.0875974
260	13	iMath	03_Water1	m1	GetData	mDB.GetNodes		1.70054e+09	Mon Nov 20 22:35:17 2023	2.07581
261	13	iMath	03_Water1	m1	GetData	mDB.GetTreeGraph		1.70054e+09	Mon Nov 20 22:35:17 2023	0.104743
262	13	iMath	03_Water1	m1	GetData total time			1.70054e+09	Mon Nov 20 22:35:18 2023	11.0635
263	13	iMath	03_Water1	m1	Model Building	look-up tables preparation		1.70054e+09	Mon Nov 20 22:35:18 2023	0.00705838
264	13	iMath	03_Water1	m1	Model Building	sets declaration		1.70054e+09	Mon Nov 20 22:35:18 2023	0.237678
265	13	iMath	03_Water1	m1	Model Building	params declaration		1.70054e+09	Mon Nov 20 22:35:23 2023	4.89183
266	13	iMath	03_Water1	m1	Model Building	Conservation of area declaration		1.70054e+09	Mon Nov 20 22:35:24 2023	0.634644
267	13	iMath	03_Water1	m1	Model Building	Accounting Var VolCut	cAcctVolCut	1.70054e+09	Mon Nov 20 22:35:38 2023	14.1594
268	13	iMath	03_Water1	m1	Model Building	Accounting Var DscCosts	cAcctDscCosts	1.70054e+09	Mon Nov 20 22:35:56 2023	17.8145
269	13	iMath	03_Water1	m1	Model Building	Accounting Var DscRevenue	cAcctDscRevenue	1.70054e+09	Mon Nov 20 22:36:11 2023	15.6734
270	13	iMath	03_Water1	m1	Model Building	Accounting Var CRemoved	cAcctCRemoved	1.70054e+09	Mon Nov 20 22:36:27 2023	16.0357
271	13	iMath	03_Water1	m1	Model Building	Accounting Var AgeControl	cAcctAgeControl	1.70054e+09	Mon Nov 20 22:36:42 2023	14.4547
272	13	iMath	03_Water1	m1	Model Building	RHS declaration		1.70054e+09	Mon Nov 20 22:36:42 2023	0.00107646
273	13	iMath	03_Water1	m1	Model Building	Constraints		1.70054e+09	Mon Nov 20 22:36:42 2023	0
274	13	iMath	03_Water1	m1	Model Building	Objectives		1.70054e+09	Mon Nov 20 22:36:42 2023	0
275	13	iMath	03_Water1	m1	Model Building - total time			1.70054e+09	Mon Nov 20 22:36:42 2023	83.91
276	13	iMath	03_Water1	m1	Solve the model			1.70054e+09	Mon Nov 20 22:37:08 2023	25.863
278	13	iMath	03_Water1	m1	Model Measurements			1.70054e+09	Mon Nov 20 22:37:17 2023	8.99729
279	14	iMath	03_Water1	m2	Connect to Database			1.70054e+09	Mon Nov 20 22:37:28 2023	0.1526
280	14	iMath	03_Water1	m2	GetData	reading nodes and creating memory dics		1.70054e+09	Mon Nov 20 22:37:35 2023	6.93119
281	14	iMath	03_Water1	m2	GetData	getting all sets but VarNodes:		1.70054e+09	Mon Nov 20 22:37:36 2023	0.142378
282	14	iMath	03_Water1	m2	GetData	getting VarNodes		1.70054e+09	Mon Nov 20 22:37:36 2023	0.124129
283	14	iMath	03_Water1	m2	GetData	mDB.GetNodes		1.70054e+09	Mon Nov 20 22:37:37 2023	0.877945
284	14	iMath	03_Water1	m2	GetData	mDB.GetTreeGraph		1.70054e+09	Mon Nov 20 22:37:37 2023	0.188073
285	14	iMath	03_Water1	m2	GetData total time			1.70054e+09	Mon Nov 20 22:37:38 2023	9.30634
286	14	iMath	03_Water1	m2	Model Building	look-up tables preparation		1.70054e+09	Mon Nov 20 22:37:38 2023	0.00940537
287	14	iMath	03_Water1	m2	Model Building	sets declaration		1.70054e+09	Mon Nov 20 22:37:38 2023	0.396311
288	14	iMath	03_Water1	m2	Model Building	params declaration		1.70054e+09	Mon Nov 20 22:37:43 2023	4.90558
289	14	iMath	03_Water1	m2	Model Building	Conservation of area declaration		1.70054e+09	Mon Nov 20 22:37:44 2023	1.21347
290	14	iMath	03_Water1	m2	Model Building	Accounting Var VolCut	cAcctVolCut	1.70054e+09	Mon Nov 20 22:37:50 2023	6.27331
291	14	iMath	03_Water1	m2	Model Building	Accounting Var DscCosts	cAcctDscCosts	1.70054e+09	Mon Nov 20 22:37:58 2023	7.53155
292	14	iMath	03_Water1	m2	Model Building	Accounting Var DscRevenue	cAcctDscRevenue	1.70054e+09	Mon Nov 20 22:38:04 2023	6.14557
293	14	iMath	03_Water1	m2	Model Building	Accounting Var CRemoved	cAcctCRemoved	1.70054e+09	Mon Nov 20 22:38:10 2023	6.1934
294	14	iMath	03_Water1	m2	Model Building	Accounting Var AgeControl	cAcctAgeControl	1.70054e+09	Mon Nov 20 22:38:18 2023	7.82038
295	14	iMath	03_Water1	m2	Model Building	RHS declaration		1.70054e+09	Mon Nov 20 22:38:18 2023	0
296	14	iMath	03_Water1	m2	Model Building	Constraints		1.70054e+09	Mon Nov 20 22:38:18 2023	0.00099659
297	14	iMath	03_Water1	m2	Model Building	Objectives		1.70054e+09	Mon Nov 20 22:38:18 2023	0
298	14	iMath	03_Water1	m2	Model Building - total time			1.70054e+09	Mon Nov 20 22:38:18 2023	40.4906
299	14	iMath	03_Water1	m2	Solve the model			1.70054e+09	Mon Nov 20 22:38:37 2023	18.7975
301	14	iMath	03_Water1	m2	Model Measurements			1.70054e+09	Mon Nov 20 22:38:43 2023	5.74851
302	15	iMath	03_Water1	m3	Connect to Database			1.70054e+09	Mon Nov 20 22:38:54 2023	0.154492
303	15	iMath	03_Water1	m3	GetData	reading nodes and creating memory dics		1.70054e+09	Mon Nov 20 22:39:02 2023	7.57605
304	15	iMath	03_Water1	m3	GetData	getting all sets but VarNodes:		1.70054e+09	Mon Nov 20 22:39:02 2023	0.145407
305	15	iMath	03_Water1	m3	GetData	getting VarNodes		1.70054e+09	Mon Nov 20 22:39:02 2023	0.223743
306	15	iMath	03_Water1	m3	GetData	mDB.GetNodes		1.70054e+09	Mon Nov 20 22:39:02 2023	0.339612
307	15	iMath	03_Water1	m3	GetData	mDB.GetTreeGraph		1.70054e+09	Mon Nov 20 22:39:03 2023	0.642852
308	15	iMath	03_Water1	m3	GetData total time			1.70054e+09	Mon Nov 20 22:39:04 2023	10.2671
309	15	iMath	03_Water1	m3	Model Building	look-up tables preparation		1.70054e+09	Mon Nov 20 22:39:04 2023	0.0344839
310	15	iMath	03_Water1	m3	Model Building	sets declaration		1.70054e+09	Mon Nov 20 22:39:05 2023	1.01821
311	15	iMath	03_Water1	m3	Model Building	params declaration		1.70054e+09	Mon Nov 20 22:39:10 2023	4.69031
312	15	iMath	03_Water1	m3	Model Building	Conservation of area declaration		1.70054e+09	Mon Nov 20 22:39:17 2023	7.20418
313	15	iMath	03_Water1	m3	Model Building	Accounting Var VolCut	cAcctVolCut	1.70054e+09	Mon Nov 20 22:39:20 2023	2.57899
314	15	iMath	03_Water1	m3	Model Building	Accounting Var DscCosts	cAcctDscCosts	1.70054e+09	Mon Nov 20 22:39:22 2023	2.53791
315	15	iMath	03_Water1	m3	Model Building	Accounting Var DscRevenue	cAcctDscRevenue	1.70054e+09	Mon Nov 20 22:39:25 2023	2.54177
316	15	iMath	03_Water1	m3	Model Building	Accounting Var CRemoved	cAcctCRemoved	1.70054e+09	Mon Nov 20 22:39:29 2023	3.91245
317	15	iMath	03_Water1	m3	Model Building	Accounting Var AgeControl	cAcctAgeControl	1.70054e+09	Mon Nov 20 22:39:31 2023	2.53965
318	15	iMath	03_Water1	m3	Model Building	RHS declaration		1.70054e+09	Mon Nov 20 22:39:31 2023	0
319	15	iMath	03_Water1	m3	Model Building	Constraints		1.70054e+09	Mon Nov 20 22:39:31 2023	0.000997066
320	15	iMath	03_Water1	m3	Model Building	Objectives		1.70054e+09	Mon Nov 20 22:39:31 2023	0
321	15	iMath	03_Water1	m3	Model Building - total time			1.70054e+09	Mon Nov 20 22:39:31 2023	27.0599
322	15	iMath	03_Water1	m3	Solve the model			1.70054e+09	Mon Nov 20 22:39:51 2023	20.1941
324	15	iMath	03_Water1	m3	Model Measurements			1.70054e+09	Mon Nov 20 22:39:57 2023	5.36042
325	16	iMath	03_Water2	m1	Connect to Database			1.70054e+09	Mon Nov 20 22:40:08 2023	0.150375
326	16	iMath	03_Water2	m1	GetData	reading nodes and creating memory dics		1.70054e+09	Mon Nov 20 22:40:15 2023	7.03554
327	16	iMath	03_Water2	m1	GetData	getting all sets but VarNodes:		1.70054e+09	Mon Nov 20 22:40:15 2023	0.138639
328	16	iMath	03_Water2	m1	GetData	getting VarNodes		1.70054e+09	Mon Nov 20 22:40:15 2023	0.0906169
329	16	iMath	03_Water2	m1	GetData	mDB.GetNodes		1.70054e+09	Mon Nov 20 22:40:18 2023	2.05215
330	16	iMath	03_Water2	m1	GetData	mDB.GetTreeGraph		1.70054e+09	Mon Nov 20 22:40:18 2023	0.110698
331	16	iMath	03_Water2	m1	GetData total time			1.70054e+09	Mon Nov 20 22:40:19 2023	10.4975
332	16	iMath	03_Water2	m1	Model Building	look-up tables preparation		1.70054e+09	Mon Nov 20 22:40:19 2023	0.00399446
333	16	iMath	03_Water2	m1	Model Building	sets declaration		1.70054e+09	Mon Nov 20 22:40:19 2023	0.199295
334	16	iMath	03_Water2	m1	Model Building	params declaration		1.70054e+09	Mon Nov 20 22:40:23 2023	4.59109
335	16	iMath	03_Water2	m1	Model Building	Conservation of area declaration		1.70054e+09	Mon Nov 20 22:40:24 2023	0.625892
336	16	iMath	03_Water2	m1	Model Building	Accounting Var VolCut	cAcctVolCut	1.70054e+09	Mon Nov 20 22:40:38 2023	14.2108
337	16	iMath	03_Water2	m1	Model Building	Accounting Var DscCosts	cAcctDscCosts	1.70054e+09	Mon Nov 20 22:40:56 2023	17.7687
338	16	iMath	03_Water2	m1	Model Building	Accounting Var DscRevenue	cAcctDscRevenue	1.70054e+09	Mon Nov 20 22:41:11 2023	15.5063
339	16	iMath	03_Water2	m1	Model Building	Accounting Var CRemoved	cAcctCRemoved	1.70054e+09	Mon Nov 20 22:41:27 2023	15.6848
340	16	iMath	03_Water2	m1	Model Building	Accounting Var PltCover	cAcctPltCover	1.70054e+09	Mon Nov 20 22:43:04 2023	97.1774
341	16	iMath	03_Water2	m1	Model Building	RHS declaration		1.70054e+09	Mon Nov 20 22:43:04 2023	0
342	16	iMath	03_Water2	m1	Model Building	Constraints		1.70054e+09	Mon Nov 20 22:43:04 2023	0.00119472
343	16	iMath	03_Water2	m1	Model Building	Objectives		1.70054e+09	Mon Nov 20 22:43:04 2023	0
344	16	iMath	03_Water2	m1	Model Building - total time			1.70054e+09	Mon Nov 20 22:43:04 2023	165.769
345	16	iMath	03_Water2	m1	Solve the model			1.70054e+09	Mon Nov 20 22:43:27 2023	22.3765
347	16	iMath	03_Water2	m1	Model Measurements			1.70054e+09	Mon Nov 20 22:43:34 2023	6.94157
348	17	iMath	03_Water2	m2	Connect to Database			1.70054e+09	Mon Nov 20 22:43:46 2023	0.153771
349	17	iMath	03_Water2	m2	GetData	reading nodes and creating memory dics		1.70054e+09	Mon Nov 20 22:43:53 2023	7.30747
350	17	iMath	03_Water2	m2	GetData	getting all sets but VarNodes:		1.70054e+09	Mon Nov 20 22:43:54 2023	0.156334
351	17	iMath	03_Water2	m2	GetData	getting VarNodes		1.70054e+09	Mon Nov 20 22:43:54 2023	0.130501
352	17	iMath	03_Water2	m2	GetData	mDB.GetNodes		1.70054e+09	Mon Nov 20 22:43:55 2023	0.918533
353	17	iMath	03_Water2	m2	GetData	mDB.GetTreeGraph		1.70054e+09	Mon Nov 20 22:43:55 2023	0.202911
354	17	iMath	03_Water2	m2	GetData total time			1.70054e+09	Mon Nov 20 22:43:56 2023	9.75233
355	17	iMath	03_Water2	m2	Model Building	look-up tables preparation		1.70054e+09	Mon Nov 20 22:43:56 2023	0.0101452
356	17	iMath	03_Water2	m2	Model Building	sets declaration		1.70054e+09	Mon Nov 20 22:43:56 2023	0.367135
357	17	iMath	03_Water2	m2	Model Building	params declaration		1.70054e+09	Mon Nov 20 22:44:01 2023	4.72976
358	17	iMath	03_Water2	m2	Model Building	Conservation of area declaration		1.70054e+09	Mon Nov 20 22:44:02 2023	1.21067
359	17	iMath	03_Water2	m2	Model Building	Accounting Var VolCut	cAcctVolCut	1.70054e+09	Mon Nov 20 22:44:08 2023	6.33758
360	17	iMath	03_Water2	m2	Model Building	Accounting Var DscCosts	cAcctDscCosts	1.70054e+09	Mon Nov 20 22:44:18 2023	9.19661
361	17	iMath	03_Water2	m2	Model Building	Accounting Var DscRevenue	cAcctDscRevenue	1.70054e+09	Mon Nov 20 22:44:24 2023	6.47719
362	17	iMath	03_Water2	m2	Model Building	Accounting Var CRemoved	cAcctCRemoved	1.70054e+09	Mon Nov 20 22:44:32 2023	8.15476
363	17	iMath	03_Water2	m2	Model Building	Accounting Var PltCover	cAcctPltCover	1.70054e+09	Mon Nov 20 22:45:13 2023	40.6535
364	17	iMath	03_Water2	m2	Model Building	RHS declaration		1.70054e+09	Mon Nov 20 22:45:13 2023	0
365	17	iMath	03_Water2	m2	Model Building	Constraints		1.70054e+09	Mon Nov 20 22:45:13 2023	0.000996828
366	17	iMath	03_Water2	m2	Model Building	Objectives		1.70054e+09	Mon Nov 20 22:45:13 2023	0
367	17	iMath	03_Water2	m2	Model Building - total time			1.70054e+09	Mon Nov 20 22:45:13 2023	77.1384
368	17	iMath	03_Water2	m2	Solve the model			1.70054e+09	Mon Nov 20 22:45:29 2023	15.9196
370	17	iMath	03_Water2	m2	Model Measurements			1.70054e+09	Mon Nov 20 22:45:35 2023	5.26369
371	18	iMath	03_Water2	m3	Connect to Database			1.70054e+09	Mon Nov 20 22:45:46 2023	0.151141
372	18	iMath	03_Water2	m3	GetData	reading nodes and creating memory dics		1.70054e+09	Mon Nov 20 22:45:53 2023	6.91397
373	18	iMath	03_Water2	m3	GetData	getting all sets but VarNodes:		1.70054e+09	Mon Nov 20 22:45:53 2023	0.155401
374	18	iMath	03_Water2	m3	GetData	getting VarNodes		1.70054e+09	Mon Nov 20 22:45:53 2023	0.259528
375	18	iMath	03_Water2	m3	GetData	mDB.GetNodes		1.70054e+09	Mon Nov 20 22:45:53 2023	0.410036
376	18	iMath	03_Water2	m3	GetData	mDB.GetTreeGraph		1.70054e+09	Mon Nov 20 22:45:54 2023	0.768723
377	18	iMath	03_Water2	m3	GetData total time			1.70054e+09	Mon Nov 20 22:45:55 2023	9.59963
378	18	iMath	03_Water2	m3	Model Building	look-up tables preparation		1.70054e+09	Mon Nov 20 22:45:55 2023	0.0348089
379	18	iMath	03_Water2	m3	Model Building	sets declaration		1.70054e+09	Mon Nov 20 22:45:56 2023	1.02305
380	18	iMath	03_Water2	m3	Model Building	params declaration		1.70054e+09	Mon Nov 20 22:46:01 2023	4.70239
381	18	iMath	03_Water2	m3	Model Building	Conservation of area declaration		1.70054e+09	Mon Nov 20 22:46:09 2023	7.85048
382	18	iMath	03_Water2	m3	Model Building	Accounting Var VolCut	cAcctVolCut	1.70054e+09	Mon Nov 20 22:46:12 2023	2.93598
383	18	iMath	03_Water2	m3	Model Building	Accounting Var DscCosts	cAcctDscCosts	1.70054e+09	Mon Nov 20 22:46:15 2023	2.83748
384	18	iMath	03_Water2	m3	Model Building	Accounting Var DscRevenue	cAcctDscRevenue	1.70054e+09	Mon Nov 20 22:46:17 2023	2.88136
385	18	iMath	03_Water2	m3	Model Building	Accounting Var CRemoved	cAcctCRemoved	1.70054e+09	Mon Nov 20 22:46:22 2023	4.26946
386	18	iMath	03_Water2	m3	Model Building	Accounting Var PltCover	cAcctPltCover	1.70054e+09	Mon Nov 20 22:46:39 2023	17.6792
387	18	iMath	03_Water2	m3	Model Building	RHS declaration		1.70054e+09	Mon Nov 20 22:46:39 2023	0
388	18	iMath	03_Water2	m3	Model Building	Constraints		1.70054e+09	Mon Nov 20 22:46:39 2023	0.00199652
389	18	iMath	03_Water2	m3	Model Building	Objectives		1.70054e+09	Mon Nov 20 22:46:39 2023	0
390	18	iMath	03_Water2	m3	Model Building - total time			1.70054e+09	Mon Nov 20 22:46:39 2023	44.2162
391	18	iMath	03_Water2	m3	Solve the model			1.70054e+09	Mon Nov 20 22:46:58 2023	18.1528
393	18	iMath	03_Water2	m3	Model Measurements			1.70054e+09	Mon Nov 20 22:47:03 2023	5.15221
394	19	iMath	03_Water	m1	Connect to Database			1.70054e+09	Mon Nov 20 22:47:14 2023	0.153407
395	19	iMath	03_Water	m1	GetData	reading nodes and creating memory dics		1.70054e+09	Mon Nov 20 22:47:21 2023	7.45721
396	19	iMath	03_Water	m1	GetData	getting all sets but VarNodes:		1.70054e+09	Mon Nov 20 22:47:22 2023	0.137413
397	19	iMath	03_Water	m1	GetData	getting VarNodes		1.70054e+09	Mon Nov 20 22:47:22 2023	0.0844922
398	19	iMath	03_Water	m1	GetData	mDB.GetNodes		1.70054e+09	Mon Nov 20 22:47:24 2023	2.09365
399	19	iMath	03_Water	m1	GetData	mDB.GetTreeGraph		1.70054e+09	Mon Nov 20 22:47:24 2023	0.10796
400	19	iMath	03_Water	m1	GetData total time			1.70054e+09	Mon Nov 20 22:47:25 2023	11.2896
401	19	iMath	03_Water	m1	Model Building	look-up tables preparation		1.70054e+09	Mon Nov 20 22:47:25 2023	0.00704408
402	19	iMath	03_Water	m1	Model Building	sets declaration		1.70054e+09	Mon Nov 20 22:47:25 2023	0.235614
403	19	iMath	03_Water	m1	Model Building	params declaration		1.70054e+09	Mon Nov 20 22:47:31 2023	5.51408
404	19	iMath	03_Water	m1	Model Building	Conservation of area declaration		1.70054e+09	Mon Nov 20 22:47:32 2023	0.642087
405	19	iMath	03_Water	m1	Model Building	Accounting Var VolCut	cAcctVolCut	1.70054e+09	Mon Nov 20 22:47:46 2023	14.1193
406	19	iMath	03_Water	m1	Model Building	Accounting Var DscCosts	cAcctDscCosts	1.70054e+09	Mon Nov 20 22:48:03 2023	17.6649
407	19	iMath	03_Water	m1	Model Building	Accounting Var DscRevenue	cAcctDscRevenue	1.70054e+09	Mon Nov 20 22:48:19 2023	15.2366
408	19	iMath	03_Water	m1	Model Building	Accounting Var CRemoved	cAcctCRemoved	1.70054e+09	Mon Nov 20 22:48:34 2023	15.7138
409	19	iMath	03_Water	m1	Model Building	Accounting Var PltCover	cAcctPltCover	1.70054e+09	Mon Nov 20 22:50:12 2023	97.5987
410	19	iMath	03_Water	m1	Model Building	Accounting Var AgeControl	cAcctAgeControl	1.70054e+09	Mon Nov 20 22:50:28 2023	16.2422
411	19	iMath	03_Water	m1	Model Building	RHS declaration		1.70054e+09	Mon Nov 20 22:50:28 2023	0
412	19	iMath	03_Water	m1	Model Building	Constraints		1.70054e+09	Mon Nov 20 22:50:28 2023	0.000987291
413	19	iMath	03_Water	m1	Model Building	Objectives		1.70054e+09	Mon Nov 20 22:50:28 2023	0
414	19	iMath	03_Water	m1	Model Building - total time			1.70054e+09	Mon Nov 20 22:50:28 2023	182.975
415	19	iMath	03_Water	m1	Solve the model			1.70054e+09	Mon Nov 20 22:50:55 2023	26.5419
417	19	iMath	03_Water	m1	Model Measurements			1.70054e+09	Mon Nov 20 22:51:03 2023	7.57537
418	20	iMath	03_Water	m2	Connect to Database			1.70054e+09	Mon Nov 20 22:51:14 2023	0.15187
419	20	iMath	03_Water	m2	GetData	reading nodes and creating memory dics		1.70054e+09	Mon Nov 20 22:51:21 2023	7.43879
420	20	iMath	03_Water	m2	GetData	getting all sets but VarNodes:		1.70054e+09	Mon Nov 20 22:51:21 2023	0.155482
421	20	iMath	03_Water	m2	GetData	getting VarNodes		1.70054e+09	Mon Nov 20 22:51:22 2023	0.131405
422	20	iMath	03_Water	m2	GetData	mDB.GetNodes		1.70054e+09	Mon Nov 20 22:51:22 2023	0.905602
423	20	iMath	03_Water	m2	GetData	mDB.GetTreeGraph		1.70054e+09	Mon Nov 20 22:51:23 2023	0.203052
424	20	iMath	03_Water	m2	GetData total time			1.70054e+09	Mon Nov 20 22:51:24 2023	9.8706
425	20	iMath	03_Water	m2	Model Building	look-up tables preparation		1.70054e+09	Mon Nov 20 22:51:24 2023	0.0149419
426	20	iMath	03_Water	m2	Model Building	sets declaration		1.70054e+09	Mon Nov 20 22:51:24 2023	0.390022
427	20	iMath	03_Water	m2	Model Building	params declaration		1.70054e+09	Mon Nov 20 22:51:29 2023	5.57146
428	20	iMath	03_Water	m2	Model Building	Conservation of area declaration		1.70054e+09	Mon Nov 20 22:51:31 2023	1.18251
429	20	iMath	03_Water	m2	Model Building	Accounting Var VolCut	cAcctVolCut	1.70054e+09	Mon Nov 20 22:51:37 2023	6.28903
430	20	iMath	03_Water	m2	Model Building	Accounting Var DscCosts	cAcctDscCosts	1.70054e+09	Mon Nov 20 22:51:43 2023	6.22682
431	20	iMath	03_Water	m2	Model Building	Accounting Var DscRevenue	cAcctDscRevenue	1.70054e+09	Mon Nov 20 22:51:53 2023	9.50084
432	20	iMath	03_Water	m2	Model Building	Accounting Var CRemoved	cAcctCRemoved	1.70054e+09	Mon Nov 20 22:51:59 2023	6.27238
433	20	iMath	03_Water	m2	Model Building	Accounting Var PltCover	cAcctPltCover	1.70054e+09	Mon Nov 20 22:52:40 2023	40.9534
434	20	iMath	03_Water	m2	Model Building	Accounting Var AgeControl	cAcctAgeControl	1.70054e+09	Mon Nov 20 22:52:48 2023	8.3436
435	20	iMath	03_Water	m2	Model Building	RHS declaration		1.70054e+09	Mon Nov 20 22:52:48 2023	0
436	20	iMath	03_Water	m2	Model Building	Constraints		1.70054e+09	Mon Nov 20 22:52:48 2023	0.00199366
437	20	iMath	03_Water	m2	Model Building	Objectives		1.70054e+09	Mon Nov 20 22:52:48 2023	0
438	20	iMath	03_Water	m2	Model Building - total time			1.70054e+09	Mon Nov 20 22:52:48 2023	84.7471
439	20	iMath	03_Water	m2	Solve the model			1.70054e+09	Mon Nov 20 22:53:09 2023	20.3502
441	20	iMath	03_Water	m2	Model Measurements			1.70054e+09	Mon Nov 20 22:53:15 2023	6.20599
442	21	iMath	03_Water	m3	Connect to Database			1.70054e+09	Mon Nov 20 22:53:26 2023	0.154061
443	21	iMath	03_Water	m3	GetData	reading nodes and creating memory dics		1.70054e+09	Mon Nov 20 22:53:34 2023	7.8214
444	21	iMath	03_Water	m3	GetData	getting all sets but VarNodes:		1.70054e+09	Mon Nov 20 22:53:34 2023	0.160376
445	21	iMath	03_Water	m3	GetData	getting VarNodes		1.70054e+09	Mon Nov 20 22:53:34 2023	0.25002
446	21	iMath	03_Water	m3	GetData	mDB.GetNodes		1.70054e+09	Mon Nov 20 22:53:35 2023	0.405658
447	21	iMath	03_Water	m3	GetData	mDB.GetTreeGraph		1.70054e+09	Mon Nov 20 22:53:36 2023	0.817981
448	21	iMath	03_Water	m3	GetData total time			1.70054e+09	Mon Nov 20 22:53:37 2023	10.5309
449	21	iMath	03_Water	m3	Model Building	look-up tables preparation		1.70054e+09	Mon Nov 20 22:53:37 2023	0.0319731
450	21	iMath	03_Water	m3	Model Building	sets declaration		1.70054e+09	Mon Nov 20 22:53:38 2023	1.05662
451	21	iMath	03_Water	m3	Model Building	params declaration		1.70054e+09	Mon Nov 20 22:53:43 2023	5.58557
452	21	iMath	03_Water	m3	Model Building	Conservation of area declaration		1.70054e+09	Mon Nov 20 22:53:51 2023	7.6485
453	21	iMath	03_Water	m3	Model Building	Accounting Var VolCut	cAcctVolCut	1.70054e+09	Mon Nov 20 22:53:54 2023	3.02903
454	21	iMath	03_Water	m3	Model Building	Accounting Var DscCosts	cAcctDscCosts	1.70054e+09	Mon Nov 20 22:53:57 2023	2.9596
455	21	iMath	03_Water	m3	Model Building	Accounting Var DscRevenue	cAcctDscRevenue	1.70054e+09	Mon Nov 20 22:54:00 2023	2.93561
456	21	iMath	03_Water	m3	Model Building	Accounting Var CRemoved	cAcctCRemoved	1.70054e+09	Mon Nov 20 22:54:03 2023	2.93121
457	21	iMath	03_Water	m3	Model Building	Accounting Var PltCover	cAcctPltCover	1.70054e+09	Mon Nov 20 22:54:21 2023	18.2752
458	21	iMath	03_Water	m3	Model Building	Accounting Var AgeControl	cAcctAgeControl	1.70054e+09	Mon Nov 20 22:54:26 2023	4.59504
459	21	iMath	03_Water	m3	Model Building	RHS declaration		1.70054e+09	Mon Nov 20 22:54:26 2023	0
460	21	iMath	03_Water	m3	Model Building	Constraints		1.70054e+09	Mon Nov 20 22:54:26 2023	0.00100923
461	21	iMath	03_Water	m3	Model Building	Objectives		1.70054e+09	Mon Nov 20 22:54:26 2023	0.00131893
462	21	iMath	03_Water	m3	Model Building - total time			1.70054e+09	Mon Nov 20 22:54:26 2023	49.0507
463	21	iMath	03_Water	m3	Solve the model			1.70054e+09	Mon Nov 20 22:54:48 2023	22.0607
465	21	iMath	03_Water	m3	Model Measurements			1.70054e+09	Mon Nov 20 22:54:54 2023	5.44661
466	22	iMath	01_NPV_Inv	m1	Connect to Database			1.70068e+09	Wed Nov 22 13:28:21 2023	0.776311
467	22	iMath	01_NPV_Inv	m1	GetData	reading nodes and creating memory dics		1.70068e+09	Wed Nov 22 13:28:35 2023	13.773
468	22	iMath	01_NPV_Inv	m1	GetData	getting all sets but VarNodes:		1.70068e+09	Wed Nov 22 13:28:35 2023	0.103214
469	22	iMath	01_NPV_Inv	m1	GetData	getting VarNodes		1.70068e+09	Wed Nov 22 13:28:35 2023	0.0755241
470	22	iMath	01_NPV_Inv	m1	GetData	mDB.GetNodes		1.70068e+09	Wed Nov 22 13:28:37 2023	2.12151
471	22	iMath	01_NPV_Inv	m1	GetData	mDB.GetTreeGraph		1.70068e+09	Wed Nov 22 13:28:37 2023	0.0951619
472	22	iMath	01_NPV_Inv	m1	GetData total time			1.70068e+09	Wed Nov 22 13:28:38 2023	16.5094
473	22	iMath	01_NPV_Inv	m1	Model Building	look-up tables preparation		1.70068e+09	Wed Nov 22 13:28:38 2023	0.00717473
474	22	iMath	01_NPV_Inv	m1	Model Building	sets declaration		1.70068e+09	Wed Nov 22 13:28:38 2023	0.236442
475	22	iMath	01_NPV_Inv	m1	Model Building	params declaration		1.70068e+09	Wed Nov 22 13:28:41 2023	2.96003
476	22	iMath	01_NPV_Inv	m1	Model Building	Conservation of area declaration		1.70068e+09	Wed Nov 22 13:28:42 2023	0.729932
477	22	iMath	01_NPV_Inv	m1	Model Building	Accounting Var VolCut	cAcctVolCut	1.70068e+09	Wed Nov 22 13:28:56 2023	14.9086
478	22	iMath	01_NPV_Inv	m1	Model Building	Accounting Var DscTmbCst	cAcctDscTmbCst	1.70068e+09	Wed Nov 22 13:29:11 2023	14.8324
479	22	iMath	01_NPV_Inv	m1	Model Building	Accounting Var DscTmbRev	cAcctDscTmbRev	1.70068e+09	Wed Nov 22 13:29:25 2023	13.9403
480	22	iMath	01_NPV_Inv	m1	Model Building	Accounting Var Inventory	cAcctInventory	1.70068e+09	Wed Nov 22 13:29:40 2023	14.4588
481	22	iMath	01_NPV_Inv	m1	Model Building	RHS declaration		1.70068e+09	Wed Nov 22 13:29:40 2023	0
482	22	iMath	01_NPV_Inv	m1	Model Building	Constraints		1.70068e+09	Wed Nov 22 13:29:40 2023	0
483	22	iMath	01_NPV_Inv	m1	Model Building	Objectives		1.70068e+09	Wed Nov 22 13:29:40 2023	0
484	22	iMath	01_NPV_Inv	m1	Model Building - total time			1.70068e+09	Wed Nov 22 13:29:40 2023	62.0737
485	22	iMath	01_NPV_Inv	m1	Solve the model			1.70068e+09	Wed Nov 22 13:29:51 2023	11.6234
486	22	iMath	01_NPV_Inv	m1	Saving the scenario results			1.70068e+09	Wed Nov 22 13:29:52 2023	0.503117
487	22	iMath	01_NPV_Inv	m1	Model Measurements			1.70068e+09	Wed Nov 22 13:29:57 2023	5.28419
488	23	iMath	01_NPV_Inv	m2	Connect to Database			1.70068e+09	Wed Nov 22 13:30:13 2023	0.78324
489	23	iMath	01_NPV_Inv	m2	GetData	reading nodes and creating memory dics		1.70068e+09	Wed Nov 22 13:30:31 2023	17.4633
490	23	iMath	01_NPV_Inv	m2	GetData	getting all sets but VarNodes:		1.70068e+09	Wed Nov 22 13:30:31 2023	0.0932102
491	23	iMath	01_NPV_Inv	m2	GetData	getting VarNodes		1.70068e+09	Wed Nov 22 13:30:31 2023	0.108103
492	23	iMath	01_NPV_Inv	m2	GetData	mDB.GetNodes		1.70068e+09	Wed Nov 22 13:30:32 2023	0.885704
493	23	iMath	01_NPV_Inv	m2	GetData	mDB.GetTreeGraph		1.70068e+09	Wed Nov 22 13:30:33 2023	0.832159
494	23	iMath	01_NPV_Inv	m2	GetData total time			1.70068e+09	Wed Nov 22 13:30:33 2023	19.7811
495	23	iMath	01_NPV_Inv	m2	Model Building	look-up tables preparation		1.70068e+09	Wed Nov 22 13:30:33 2023	0.00798011
496	23	iMath	01_NPV_Inv	m2	Model Building	sets declaration		1.70068e+09	Wed Nov 22 13:30:34 2023	0.435368
497	23	iMath	01_NPV_Inv	m2	Model Building	params declaration		1.70068e+09	Wed Nov 22 13:30:36 2023	2.8014
498	23	iMath	01_NPV_Inv	m2	Model Building	Conservation of area declaration		1.70068e+09	Wed Nov 22 13:30:38 2023	1.2011
499	23	iMath	01_NPV_Inv	m2	Model Building	Accounting Var VolCut	cAcctVolCut	1.70068e+09	Wed Nov 22 13:30:44 2023	6.13903
500	23	iMath	01_NPV_Inv	m2	Model Building	Accounting Var DscTmbCst	cAcctDscTmbCst	1.70068e+09	Wed Nov 22 13:30:51 2023	6.93247
501	23	iMath	01_NPV_Inv	m2	Model Building	Accounting Var DscTmbRev	cAcctDscTmbRev	1.70068e+09	Wed Nov 22 13:30:57 2023	6.20886
502	23	iMath	01_NPV_Inv	m2	Model Building	Accounting Var Inventory	cAcctInventory	1.70068e+09	Wed Nov 22 13:31:03 2023	5.77561
503	23	iMath	01_NPV_Inv	m2	Model Building	RHS declaration		1.70068e+09	Wed Nov 22 13:31:03 2023	0
504	23	iMath	01_NPV_Inv	m2	Model Building	Constraints		1.70068e+09	Wed Nov 22 13:31:03 2023	0
505	23	iMath	01_NPV_Inv	m2	Model Building	Objectives		1.70068e+09	Wed Nov 22 13:31:03 2023	0.000996828
506	23	iMath	01_NPV_Inv	m2	Model Building - total time			1.70068e+09	Wed Nov 22 13:31:03 2023	29.5028
507	23	iMath	01_NPV_Inv	m2	Solve the model			1.70068e+09	Wed Nov 22 13:31:12 2023	9.08603
508	23	iMath	01_NPV_Inv	m2	Saving the scenario results			1.70068e+09	Wed Nov 22 13:31:13 2023	0.692014
509	23	iMath	01_NPV_Inv	m2	Model Measurements			1.70068e+09	Wed Nov 22 13:31:19 2023	6.2777
510	24	iMath	01_NPV_Inv	m3	Connect to Database			1.70068e+09	Wed Nov 22 13:31:30 2023	0.773449
511	24	iMath	01_NPV_Inv	m3	GetData	reading nodes and creating memory dics		1.70068e+09	Wed Nov 22 13:31:37 2023	6.53038
512	24	iMath	01_NPV_Inv	m3	GetData	getting all sets but VarNodes:		1.70068e+09	Wed Nov 22 13:31:37 2023	0.116628
513	24	iMath	01_NPV_Inv	m3	GetData	getting VarNodes		1.70068e+09	Wed Nov 22 13:31:37 2023	0.224675
514	24	iMath	01_NPV_Inv	m3	GetData	mDB.GetNodes		1.70068e+09	Wed Nov 22 13:31:37 2023	0.377709
515	24	iMath	01_NPV_Inv	m3	GetData	mDB.GetTreeGraph		1.70068e+09	Wed Nov 22 13:31:39 2023	1.1839
516	24	iMath	01_NPV_Inv	m3	GetData total time			1.70068e+09	Wed Nov 22 13:31:39 2023	8.83204
517	24	iMath	01_NPV_Inv	m3	Model Building	look-up tables preparation		1.70068e+09	Wed Nov 22 13:31:39 2023	0.0311737
518	24	iMath	01_NPV_Inv	m3	Model Building	sets declaration		1.70068e+09	Wed Nov 22 13:31:40 2023	1.06573
519	24	iMath	01_NPV_Inv	m3	Model Building	params declaration		1.70068e+09	Wed Nov 22 13:31:43 2023	2.85916
520	24	iMath	01_NPV_Inv	m3	Model Building	Conservation of area declaration		1.70068e+09	Wed Nov 22 13:31:48 2023	5.07043
521	24	iMath	01_NPV_Inv	m3	Model Building	Accounting Var VolCut	cAcctVolCut	1.70068e+09	Wed Nov 22 13:31:50 2023	2.5987
522	24	iMath	01_NPV_Inv	m3	Model Building	Accounting Var DscTmbCst	cAcctDscTmbCst	1.70068e+09	Wed Nov 22 13:31:53 2023	2.39005
523	24	iMath	01_NPV_Inv	m3	Model Building	Accounting Var DscTmbRev	cAcctDscTmbRev	1.70068e+09	Wed Nov 22 13:31:55 2023	2.51373
524	24	iMath	01_NPV_Inv	m3	Model Building	Accounting Var Inventory	cAcctInventory	1.70068e+09	Wed Nov 22 13:31:58 2023	2.4921
525	24	iMath	01_NPV_Inv	m3	Model Building	RHS declaration		1.70068e+09	Wed Nov 22 13:31:58 2023	0
526	24	iMath	01_NPV_Inv	m3	Model Building	Constraints		1.70068e+09	Wed Nov 22 13:31:58 2023	0.00100541
527	24	iMath	01_NPV_Inv	m3	Model Building	Objectives		1.70068e+09	Wed Nov 22 13:31:58 2023	0
528	24	iMath	01_NPV_Inv	m3	Model Building - total time			1.70068e+09	Wed Nov 22 13:31:58 2023	19.0221
529	24	iMath	01_NPV_Inv	m3	Solve the model			1.70068e+09	Wed Nov 22 13:32:12 2023	14.5239
530	24	iMath	01_NPV_Inv	m3	Saving the scenario results			1.70068e+09	Wed Nov 22 13:32:13 2023	0.507537
531	24	iMath	01_NPV_Inv	m3	Model Measurements			1.70068e+09	Wed Nov 22 13:32:17 2023	4.15048
532	25	iMath	02_Carbon_Inv	m1	Connect to Database			1.70068e+09	Wed Nov 22 13:32:28 2023	0.776502
533	25	iMath	02_Carbon_Inv	m1	GetData	reading nodes and creating memory dics		1.70068e+09	Wed Nov 22 13:32:37 2023	8.26633
534	25	iMath	02_Carbon_Inv	m1	GetData	getting all sets but VarNodes:		1.70068e+09	Wed Nov 22 13:32:37 2023	0.13446
535	25	iMath	02_Carbon_Inv	m1	GetData	getting VarNodes		1.70068e+09	Wed Nov 22 13:32:37 2023	0.0913796
536	25	iMath	02_Carbon_Inv	m1	GetData	mDB.GetNodes		1.70068e+09	Wed Nov 22 13:32:39 2023	2.00976
537	25	iMath	02_Carbon_Inv	m1	GetData	mDB.GetTreeGraph		1.70068e+09	Wed Nov 22 13:32:39 2023	0.10789
538	25	iMath	02_Carbon_Inv	m1	GetData total time			1.70068e+09	Wed Nov 22 13:32:40 2023	11.0529
539	25	iMath	02_Carbon_Inv	m1	Model Building	look-up tables preparation		1.70068e+09	Wed Nov 22 13:32:40 2023	0.00798631
540	25	iMath	02_Carbon_Inv	m1	Model Building	sets declaration		1.70068e+09	Wed Nov 22 13:32:40 2023	0.222637
541	25	iMath	02_Carbon_Inv	m1	Model Building	params declaration		1.70068e+09	Wed Nov 22 13:32:44 2023	4.73211
542	25	iMath	02_Carbon_Inv	m1	Model Building	Conservation of area declaration		1.70068e+09	Wed Nov 22 13:32:45 2023	0.832119
543	25	iMath	02_Carbon_Inv	m1	Model Building	Accounting Var VolCut	cAcctVolCut	1.70068e+09	Wed Nov 22 13:32:59 2023	13.8666
544	25	iMath	02_Carbon_Inv	m1	Model Building	Accounting Var DscCosts	cAcctDscCosts	1.70068e+09	Wed Nov 22 13:33:14 2023	14.8978
545	25	iMath	02_Carbon_Inv	m1	Model Building	Accounting Var DscRevenue	cAcctDscRevenue	1.70068e+09	Wed Nov 22 13:33:28 2023	14.4235
546	25	iMath	02_Carbon_Inv	m1	Model Building	Accounting Var CRemoved	cAcctCRemoved	1.70068e+09	Wed Nov 22 13:33:43 2023	14.859
547	25	iMath	02_Carbon_Inv	m1	Model Building	Accounting Var Inventory	cAcctInventory	1.70068e+09	Wed Nov 22 13:33:59 2023	15.3024
548	25	iMath	02_Carbon_Inv	m1	Model Building	RHS declaration		1.70068e+09	Wed Nov 22 13:33:59 2023	0
549	25	iMath	02_Carbon_Inv	m1	Model Building	Constraints		1.70068e+09	Wed Nov 22 13:33:59 2023	0
550	25	iMath	02_Carbon_Inv	m1	Model Building	Objectives		1.70068e+09	Wed Nov 22 13:33:59 2023	0.00100517
551	25	iMath	02_Carbon_Inv	m1	Model Building - total time			1.70068e+09	Wed Nov 22 13:33:59 2023	79.1451
552	25	iMath	02_Carbon_Inv	m1	Solve the model			1.70068e+09	Wed Nov 22 13:34:23 2023	23.9599
553	25	iMath	02_Carbon_Inv	m1	Saving the scenario results			1.70068e+09	Wed Nov 22 13:34:23 2023	0.516791
554	25	iMath	02_Carbon_Inv	m1	Model Measurements			1.70068e+09	Wed Nov 22 13:34:30 2023	6.68918
555	26	iMath	02_Carbon_Inv	m2	Connect to Database			1.70068e+09	Wed Nov 22 13:34:42 2023	0.771566
556	26	iMath	02_Carbon_Inv	m2	GetData	reading nodes and creating memory dics		1.70068e+09	Wed Nov 22 13:34:49 2023	7.08501
557	26	iMath	02_Carbon_Inv	m2	GetData	getting all sets but VarNodes:		1.70068e+09	Wed Nov 22 13:34:49 2023	0.117517
558	26	iMath	02_Carbon_Inv	m2	GetData	getting VarNodes		1.70068e+09	Wed Nov 22 13:34:49 2023	0.11327
559	26	iMath	02_Carbon_Inv	m2	GetData	mDB.GetNodes		1.70068e+09	Wed Nov 22 13:34:50 2023	0.871425
560	26	iMath	02_Carbon_Inv	m2	GetData	mDB.GetTreeGraph		1.70068e+09	Wed Nov 22 13:34:50 2023	0.164393
561	26	iMath	02_Carbon_Inv	m2	GetData total time			1.70068e+09	Wed Nov 22 13:34:50 2023	8.75536
562	26	iMath	02_Carbon_Inv	m2	Model Building	look-up tables preparation		1.70068e+09	Wed Nov 22 13:34:50 2023	0.00812101
563	26	iMath	02_Carbon_Inv	m2	Model Building	sets declaration		1.70068e+09	Wed Nov 22 13:34:51 2023	0.366174
564	26	iMath	02_Carbon_Inv	m2	Model Building	params declaration		1.70068e+09	Wed Nov 22 13:34:55 2023	4.69598
565	26	iMath	02_Carbon_Inv	m2	Model Building	Conservation of area declaration		1.70068e+09	Wed Nov 22 13:34:57 2023	1.21745
566	26	iMath	02_Carbon_Inv	m2	Model Building	Accounting Var VolCut	cAcctVolCut	1.70068e+09	Wed Nov 22 13:35:05 2023	8.50925
567	26	iMath	02_Carbon_Inv	m2	Model Building	Accounting Var DscCosts	cAcctDscCosts	1.70068e+09	Wed Nov 22 13:35:11 2023	5.76782
568	26	iMath	02_Carbon_Inv	m2	Model Building	Accounting Var DscRevenue	cAcctDscRevenue	1.70068e+09	Wed Nov 22 13:35:17 2023	5.69392
569	26	iMath	02_Carbon_Inv	m2	Model Building	Accounting Var CRemoved	cAcctCRemoved	1.70068e+09	Wed Nov 22 13:35:24 2023	7.21127
570	26	iMath	02_Carbon_Inv	m2	Model Building	Accounting Var Inventory	cAcctInventory	1.70068e+09	Wed Nov 22 13:35:30 2023	5.83604
571	26	iMath	02_Carbon_Inv	m2	Model Building	RHS declaration		1.70068e+09	Wed Nov 22 13:35:30 2023	0
572	26	iMath	02_Carbon_Inv	m2	Model Building	Constraints		1.70068e+09	Wed Nov 22 13:35:30 2023	0
573	26	iMath	02_Carbon_Inv	m2	Model Building	Objectives		1.70068e+09	Wed Nov 22 13:35:30 2023	0.000989914
574	26	iMath	02_Carbon_Inv	m2	Model Building - total time			1.70068e+09	Wed Nov 22 13:35:30 2023	39.307
575	26	iMath	02_Carbon_Inv	m2	Solve the model			1.70068e+09	Wed Nov 22 13:35:45 2023	15.3221
576	26	iMath	02_Carbon_Inv	m2	Saving the scenario results			1.70068e+09	Wed Nov 22 13:35:46 2023	0.506982
577	26	iMath	02_Carbon_Inv	m2	Model Measurements			1.70068e+09	Wed Nov 22 13:35:51 2023	5.27737
578	27	iMath	02_Carbon_Inv	m3	Connect to Database			1.70068e+09	Wed Nov 22 13:36:03 2023	0.779479
579	27	iMath	02_Carbon_Inv	m3	GetData	reading nodes and creating memory dics		1.70068e+09	Wed Nov 22 13:36:10 2023	7.03187
580	27	iMath	02_Carbon_Inv	m3	GetData	getting all sets but VarNodes:		1.70068e+09	Wed Nov 22 13:36:10 2023	0.152128
581	27	iMath	02_Carbon_Inv	m3	GetData	getting VarNodes		1.70068e+09	Wed Nov 22 13:36:10 2023	0.263929
582	27	iMath	02_Carbon_Inv	m3	GetData	mDB.GetNodes		1.70068e+09	Wed Nov 22 13:36:11 2023	0.379723
583	27	iMath	02_Carbon_Inv	m3	GetData	mDB.GetTreeGraph		1.70068e+09	Wed Nov 22 13:36:12 2023	0.725489
584	27	iMath	02_Carbon_Inv	m3	GetData total time			1.70068e+09	Wed Nov 22 13:36:12 2023	8.99023
585	27	iMath	02_Carbon_Inv	m3	Model Building	look-up tables preparation		1.70068e+09	Wed Nov 22 13:36:12 2023	0.0338006
586	27	iMath	02_Carbon_Inv	m3	Model Building	sets declaration		1.70068e+09	Wed Nov 22 13:36:13 2023	1.08309
587	27	iMath	02_Carbon_Inv	m3	Model Building	params declaration		1.70068e+09	Wed Nov 22 13:36:18 2023	4.87368
588	27	iMath	02_Carbon_Inv	m3	Model Building	Conservation of area declaration		1.70068e+09	Wed Nov 22 13:36:26 2023	7.78919
589	27	iMath	02_Carbon_Inv	m3	Model Building	Accounting Var VolCut	cAcctVolCut	1.70068e+09	Wed Nov 22 13:36:28 2023	2.87445
590	27	iMath	02_Carbon_Inv	m3	Model Building	Accounting Var DscCosts	cAcctDscCosts	1.70068e+09	Wed Nov 22 13:36:31 2023	2.72668
591	27	iMath	02_Carbon_Inv	m3	Model Building	Accounting Var DscRevenue	cAcctDscRevenue	1.70068e+09	Wed Nov 22 13:36:34 2023	2.68351
592	27	iMath	02_Carbon_Inv	m3	Model Building	Accounting Var CRemoved	cAcctCRemoved	1.70068e+09	Wed Nov 22 13:36:38 2023	4.00854
593	27	iMath	02_Carbon_Inv	m3	Model Building	Accounting Var Inventory	cAcctInventory	1.70068e+09	Wed Nov 22 13:36:41 2023	2.76597
594	27	iMath	02_Carbon_Inv	m3	Model Building	RHS declaration		1.70068e+09	Wed Nov 22 13:36:41 2023	0.000998735
595	27	iMath	02_Carbon_Inv	m3	Model Building	Constraints		1.70068e+09	Wed Nov 22 13:36:41 2023	0
596	27	iMath	02_Carbon_Inv	m3	Model Building	Objectives		1.70068e+09	Wed Nov 22 13:36:41 2023	0
597	27	iMath	02_Carbon_Inv	m3	Model Building - total time			1.70068e+09	Wed Nov 22 13:36:41 2023	28.8409
598	27	iMath	02_Carbon_Inv	m3	Solve the model			1.70068e+09	Wed Nov 22 13:36:59 2023	17.9306
599	27	iMath	02_Carbon_Inv	m3	Saving the scenario results			1.70068e+09	Wed Nov 22 13:36:59 2023	0.508661
600	27	iMath	02_Carbon_Inv	m3	Model Measurements			1.70068e+09	Wed Nov 22 13:37:04 2023	5.02931
601	28	iMath	03_Water_Inv	m1	Connect to Database			1.70068e+09	Wed Nov 22 13:37:16 2023	0.789471
602	28	iMath	03_Water_Inv	m1	GetData	reading nodes and creating memory dics		1.70068e+09	Wed Nov 22 13:37:24 2023	7.56645
603	28	iMath	03_Water_Inv	m1	GetData	getting all sets but VarNodes:		1.70068e+09	Wed Nov 22 13:37:24 2023	0.148172
604	28	iMath	03_Water_Inv	m1	GetData	getting VarNodes		1.70068e+09	Wed Nov 22 13:37:24 2023	0.0908506
605	28	iMath	03_Water_Inv	m1	GetData	mDB.GetNodes		1.70068e+09	Wed Nov 22 13:37:26 2023	2.05833
606	28	iMath	03_Water_Inv	m1	GetData	mDB.GetTreeGraph		1.70068e+09	Wed Nov 22 13:37:26 2023	0.114858
607	28	iMath	03_Water_Inv	m1	GetData total time			1.70068e+09	Wed Nov 22 13:37:26 2023	10.4775
608	28	iMath	03_Water_Inv	m1	Model Building	look-up tables preparation		1.70068e+09	Wed Nov 22 13:37:26 2023	0.00885344
609	28	iMath	03_Water_Inv	m1	Model Building	sets declaration		1.70068e+09	Wed Nov 22 13:37:27 2023	0.228706
610	28	iMath	03_Water_Inv	m1	Model Building	params declaration		1.70068e+09	Wed Nov 22 13:37:33 2023	6.51468
611	28	iMath	03_Water_Inv	m1	Model Building	Conservation of area declaration		1.70068e+09	Wed Nov 22 13:37:34 2023	0.624501
612	28	iMath	03_Water_Inv	m1	Model Building	Accounting Var VolCut	cAcctVolCut	1.70068e+09	Wed Nov 22 13:37:48 2023	14.0349
613	28	iMath	03_Water_Inv	m1	Model Building	Accounting Var DscCosts	cAcctDscCosts	1.70068e+09	Wed Nov 22 13:38:05 2023	17.1526
614	28	iMath	03_Water_Inv	m1	Model Building	Accounting Var DscRevenue	cAcctDscRevenue	1.70068e+09	Wed Nov 22 13:38:20 2023	15.1469
615	28	iMath	03_Water_Inv	m1	Model Building	Accounting Var CRemoved	cAcctCRemoved	1.70068e+09	Wed Nov 22 13:38:35 2023	15.4175
616	28	iMath	03_Water_Inv	m1	Model Building	Accounting Var PltCover	cAcctPltCover	1.70068e+09	Wed Nov 22 13:40:12 2023	96.3376
617	28	iMath	03_Water_Inv	m1	Model Building	Accounting Var AgeControl	cAcctAgeControl	1.70068e+09	Wed Nov 22 13:40:28 2023	16.1552
618	28	iMath	03_Water_Inv	m1	Model Building	Accounting Var Inventory	cAcctInventory	1.70068e+09	Wed Nov 22 13:40:42 2023	14.295
619	28	iMath	03_Water_Inv	m1	Model Building	RHS declaration		1.70068e+09	Wed Nov 22 13:40:42 2023	0.00111604
620	28	iMath	03_Water_Inv	m1	Model Building	Constraints		1.70068e+09	Wed Nov 22 13:40:42 2023	0.000982761
621	28	iMath	03_Water_Inv	m1	Model Building	Objectives		1.70068e+09	Wed Nov 22 13:40:42 2023	0
622	28	iMath	03_Water_Inv	m1	Model Building - total time			1.70068e+09	Wed Nov 22 13:40:42 2023	195.92
623	28	iMath	03_Water_Inv	m1	Solve the model			1.70068e+09	Wed Nov 22 13:41:14 2023	31.5614
624	28	iMath	03_Water_Inv	m1	Saving the scenario results			1.70068e+09	Wed Nov 22 13:41:14 2023	0.543627
625	28	iMath	03_Water_Inv	m1	Model Measurements			1.70068e+09	Wed Nov 22 13:41:23 2023	9.16257
626	29	iMath	03_Water_Inv	m2	Connect to Database			1.70068e+09	Wed Nov 22 13:41:36 2023	0.776169
627	29	iMath	03_Water_Inv	m2	GetData	reading nodes and creating memory dics		1.70068e+09	Wed Nov 22 13:41:48 2023	12.2387
628	29	iMath	03_Water_Inv	m2	GetData	getting all sets but VarNodes:		1.70068e+09	Wed Nov 22 13:41:48 2023	0.157823
629	29	iMath	03_Water_Inv	m2	GetData	getting VarNodes		1.70068e+09	Wed Nov 22 13:41:48 2023	0.119934
630	29	iMath	03_Water_Inv	m2	GetData	mDB.GetNodes		1.70068e+09	Wed Nov 22 13:41:49 2023	0.91634
631	29	iMath	03_Water_Inv	m2	GetData	mDB.GetTreeGraph		1.70068e+09	Wed Nov 22 13:41:50 2023	0.199832
632	29	iMath	03_Water_Inv	m2	GetData total time			1.70068e+09	Wed Nov 22 13:41:53 2023	16.801
633	29	iMath	03_Water_Inv	m2	Model Building	look-up tables preparation		1.70068e+09	Wed Nov 22 13:41:53 2023	0.0138161
634	29	iMath	03_Water_Inv	m2	Model Building	sets declaration		1.70068e+09	Wed Nov 22 13:41:53 2023	0.392519
635	29	iMath	03_Water_Inv	m2	Model Building	params declaration		1.70068e+09	Wed Nov 22 13:41:59 2023	6.47114
636	29	iMath	03_Water_Inv	m2	Model Building	Conservation of area declaration		1.70068e+09	Wed Nov 22 13:42:01 2023	1.19463
637	29	iMath	03_Water_Inv	m2	Model Building	Accounting Var VolCut	cAcctVolCut	1.70068e+09	Wed Nov 22 13:42:07 2023	6.61747
638	29	iMath	03_Water_Inv	m2	Model Building	Accounting Var DscCosts	cAcctDscCosts	1.70068e+09	Wed Nov 22 13:42:14 2023	6.65675
639	29	iMath	03_Water_Inv	m2	Model Building	Accounting Var DscRevenue	cAcctDscRevenue	1.70068e+09	Wed Nov 22 13:42:21 2023	7.30751
640	29	iMath	03_Water_Inv	m2	Model Building	Accounting Var CRemoved	cAcctCRemoved	1.70068e+09	Wed Nov 22 13:42:30 2023	8.32505
641	29	iMath	03_Water_Inv	m2	Model Building	Accounting Var PltCover	cAcctPltCover	1.70068e+09	Wed Nov 22 13:43:12 2023	42.7628
642	29	iMath	03_Water_Inv	m2	Model Building	Accounting Var AgeControl	cAcctAgeControl	1.70068e+09	Wed Nov 22 13:43:19 2023	6.51093
643	29	iMath	03_Water_Inv	m2	Model Building	Accounting Var Inventory	cAcctInventory	1.70068e+09	Wed Nov 22 13:43:25 2023	6.53029
644	29	iMath	03_Water_Inv	m2	Model Building	RHS declaration		1.70068e+09	Wed Nov 22 13:43:25 2023	0
645	29	iMath	03_Water_Inv	m2	Model Building	Constraints		1.70068e+09	Wed Nov 22 13:43:25 2023	0.00156355
646	29	iMath	03_Water_Inv	m2	Model Building	Objectives		1.70068e+09	Wed Nov 22 13:43:25 2023	0
647	29	iMath	03_Water_Inv	m2	Model Building - total time			1.70068e+09	Wed Nov 22 13:43:25 2023	92.7854
648	29	iMath	03_Water_Inv	m2	Solve the model			1.70068e+09	Wed Nov 22 13:43:49 2023	23.3259
649	29	iMath	03_Water_Inv	m2	Saving the scenario results			1.70068e+09	Wed Nov 22 13:43:50 2023	1.46786
650	29	iMath	03_Water_Inv	m2	Model Measurements			1.70068e+09	Wed Nov 22 13:43:57 2023	6.82659
651	30	iMath	03_Water_Inv	m3	Connect to Database			1.70068e+09	Wed Nov 22 13:44:09 2023	0.772091
652	30	iMath	03_Water_Inv	m3	GetData	reading nodes and creating memory dics		1.70068e+09	Wed Nov 22 13:44:21 2023	11.57
653	30	iMath	03_Water_Inv	m3	GetData	getting all sets but VarNodes:		1.70068e+09	Wed Nov 22 13:44:21 2023	0.170147
654	30	iMath	03_Water_Inv	m3	GetData	getting VarNodes		1.70068e+09	Wed Nov 22 13:44:21 2023	0.268544
655	30	iMath	03_Water_Inv	m3	GetData	mDB.GetNodes		1.70068e+09	Wed Nov 22 13:44:22 2023	0.398672
656	30	iMath	03_Water_Inv	m3	GetData	mDB.GetTreeGraph		1.70068e+09	Wed Nov 22 13:44:22 2023	0.773962
657	30	iMath	03_Water_Inv	m3	GetData total time			1.70068e+09	Wed Nov 22 13:44:23 2023	13.9132
658	30	iMath	03_Water_Inv	m3	Model Building	look-up tables preparation		1.70068e+09	Wed Nov 22 13:44:23 2023	0.0316367
659	30	iMath	03_Water_Inv	m3	Model Building	sets declaration		1.70068e+09	Wed Nov 22 13:44:24 2023	1.05634
660	30	iMath	03_Water_Inv	m3	Model Building	params declaration		1.70068e+09	Wed Nov 22 13:44:30 2023	6.50891
661	30	iMath	03_Water_Inv	m3	Model Building	Conservation of area declaration		1.70068e+09	Wed Nov 22 13:44:35 2023	4.8913
662	30	iMath	03_Water_Inv	m3	Model Building	Accounting Var VolCut	cAcctVolCut	1.70068e+09	Wed Nov 22 13:44:38 2023	2.98628
663	30	iMath	03_Water_Inv	m3	Model Building	Accounting Var DscCosts	cAcctDscCosts	1.70068e+09	Wed Nov 22 13:44:41 2023	2.89203
664	30	iMath	03_Water_Inv	m3	Model Building	Accounting Var DscRevenue	cAcctDscRevenue	1.70068e+09	Wed Nov 22 13:44:46 2023	4.30049
665	30	iMath	03_Water_Inv	m3	Model Building	Accounting Var CRemoved	cAcctCRemoved	1.70068e+09	Wed Nov 22 13:44:48 2023	2.86423
666	30	iMath	03_Water_Inv	m3	Model Building	Accounting Var PltCover	cAcctPltCover	1.70068e+09	Wed Nov 22 13:45:08 2023	19.5592
667	30	iMath	03_Water_Inv	m3	Model Building	Accounting Var AgeControl	cAcctAgeControl	1.70068e+09	Wed Nov 22 13:45:11 2023	3.09412
668	30	iMath	03_Water_Inv	m3	Model Building	Accounting Var Inventory	cAcctInventory	1.70068e+09	Wed Nov 22 13:45:14 2023	3.03235
669	30	iMath	03_Water_Inv	m3	Model Building	RHS declaration		1.70068e+09	Wed Nov 22 13:45:14 2023	0
670	30	iMath	03_Water_Inv	m3	Model Building	Constraints		1.70068e+09	Wed Nov 22 13:45:14 2023	0.00207329
671	30	iMath	03_Water_Inv	m3	Model Building	Objectives		1.70068e+09	Wed Nov 22 13:45:14 2023	0
672	30	iMath	03_Water_Inv	m3	Model Building - total time			1.70068e+09	Wed Nov 22 13:45:14 2023	51.2189
673	30	iMath	03_Water_Inv	m3	Solve the model			1.70068e+09	Wed Nov 22 13:45:38 2023	23.7871
674	30	iMath	03_Water_Inv	m3	Saving the scenario results			1.70068e+09	Wed Nov 22 13:45:38 2023	0.545977
675	30	iMath	03_Water_Inv	m3	Model Measurements			1.70068e+09	Wed Nov 22 13:45:45 2023	6.44404

## Sheet: LogResults
LogRunId	AcctVar	IndexVar	Value	Scenario	ModelType
4	DscTmbRev	1	4.02962e+07	00_OnlyVolume	m1		Scenario	01_NPV_Inv
4	DscTmbRev	2	3.42137e+07	00_OnlyVolume	m1
4	DscTmbRev	3	2.90494e+07	00_OnlyVolume	m1		Sum of Value	AcctVar
4	DscTmbRev	4	2.46646e+07	00_OnlyVolume	m1		IndexVar	Inventory	VolCut
4	DscTmbRev	5	2.09416e+07	00_OnlyVolume	m1		1	5.94875e+06	1.28097e+06
4	DscTmbRev	6	1.77806e+07	00_OnlyVolume	m1		2	5.74207e+06	1.15288e+06
4	DscTmbRev	7	1.84516e+07	00_OnlyVolume	m1		3	5.55954e+06	1.03759e+06
4	DscTmbRev	8	1.91479e+07	00_OnlyVolume	m1		4	5.55197e+06	933830
4	DscTmbRev	9	1.98704e+07	00_OnlyVolume	m1		5	5.64163e+06	840447
4	DscTmbRev	10	1.68711e+07	00_OnlyVolume	m1		6	5.76421e+06	756402
4	DscTmbRev	11	1.68098e+07	00_OnlyVolume	m1		7	5.7338e+06	832043
4	DscTmbRev	12	1.42725e+07	00_OnlyVolume	m1		8	5.81204e+06	748838
4	DscTmbRev	13	1.31119e+07	00_OnlyVolume	m1		9	5.93757e+06	673954
4	DscTmbRev	14	1.33989e+07	00_OnlyVolume	m1		10	6.099e+06	728620
4	DscTmbRev	15	1.27457e+07	00_OnlyVolume	m1		11	6.16569e+06	801483
4	DscTmbRev	16	1.08218e+07	00_OnlyVolume	m1		12	6.14841e+06	847356
4	DscTmbRev	17	9.54555e+06	00_OnlyVolume	m1		13	5.99387e+06	932092
4	DscTmbRev	18	9.90576e+06	00_OnlyVolume	m1		14	5.97209e+06	838882
4	DscTmbRev	19	1.02796e+07	00_OnlyVolume	m1		15	6.05649e+06	754994
4	DscTmbRev	20	1.06675e+07	00_OnlyVolume	m1		16	6.2659e+06	689063
4	DscTmbRev	21	1.58175e+08	00_OnlyVolume	m1		17	6.44403e+06	757969
4	VolCut	1	427139	00_OnlyVolume	m1		18	6.46405e+06	833766
4	VolCut	2	384426	00_OnlyVolume	m1		19	6.32582e+06	917143
4	VolCut	3	345983	00_OnlyVolume	m1		20	6.04986e+06	1.00886e+06
4	VolCut	4	311385	00_OnlyVolume	m1		21	5.64372e+06	1.10974e+06
4	VolCut	5	280246	00_OnlyVolume	m1
4	VolCut	6	252222	00_OnlyVolume	m1
4	VolCut	7	277444	00_OnlyVolume	m1
4	VolCut	8	305188	00_OnlyVolume	m1
4	VolCut	9	335707	00_OnlyVolume	m1
4	VolCut	10	302136	00_OnlyVolume	m1
4	VolCut	11	319101	00_OnlyVolume	m1
4	VolCut	12	287190	00_OnlyVolume	m1
4	VolCut	13	279668	00_OnlyVolume	m1
4	VolCut	14	302935	00_OnlyVolume	m1
4	VolCut	15	305457	00_OnlyVolume	m1
4	VolCut	16	274912	00_OnlyVolume	m1
4	VolCut	17	257040	00_OnlyVolume	m1
4	VolCut	18	282744	00_OnlyVolume	m1
4	VolCut	19	311018	00_OnlyVolume	m1
4	VolCut	20	342120	00_OnlyVolume	m1
4	VolCut	21	307908	00_OnlyVolume	m1
5	DscTmbRev	1	4.02962e+07	00_OnlyVolume	m2
5	DscTmbRev	2	3.42137e+07	00_OnlyVolume	m2
5	DscTmbRev	3	2.90494e+07	00_OnlyVolume	m2
5	DscTmbRev	4	2.46646e+07	00_OnlyVolume	m2
5	DscTmbRev	5	2.09416e+07	00_OnlyVolume	m2
5	DscTmbRev	6	1.77806e+07	00_OnlyVolume	m2
5	DscTmbRev	7	1.84516e+07	00_OnlyVolume	m2
5	DscTmbRev	8	1.91479e+07	00_OnlyVolume	m2
5	DscTmbRev	9	1.98704e+07	00_OnlyVolume	m2
5	DscTmbRev	10	1.68711e+07	00_OnlyVolume	m2
5	DscTmbRev	11	1.68098e+07	00_OnlyVolume	m2
5	DscTmbRev	12	1.42725e+07	00_OnlyVolume	m2
5	DscTmbRev	13	1.31119e+07	00_OnlyVolume	m2
5	DscTmbRev	14	1.33989e+07	00_OnlyVolume	m2
5	DscTmbRev	15	1.27457e+07	00_OnlyVolume	m2
5	DscTmbRev	16	1.08218e+07	00_OnlyVolume	m2
5	DscTmbRev	17	9.54555e+06	00_OnlyVolume	m2
5	DscTmbRev	18	9.90576e+06	00_OnlyVolume	m2
5	DscTmbRev	19	1.02796e+07	00_OnlyVolume	m2
5	DscTmbRev	20	1.06675e+07	00_OnlyVolume	m2
5	DscTmbRev	21	1.58175e+08	00_OnlyVolume	m2
5	VolCut	1	427139	00_OnlyVolume	m2
5	VolCut	2	384426	00_OnlyVolume	m2
5	VolCut	3	345983	00_OnlyVolume	m2
5	VolCut	4	311385	00_OnlyVolume	m2
5	VolCut	5	280246	00_OnlyVolume	m2
5	VolCut	6	252222	00_OnlyVolume	m2
5	VolCut	7	277444	00_OnlyVolume	m2
5	VolCut	8	305188	00_OnlyVolume	m2
5	VolCut	9	335707	00_OnlyVolume	m2
5	VolCut	10	302136	00_OnlyVolume	m2
5	VolCut	11	319101	00_OnlyVolume	m2
5	VolCut	12	287190	00_OnlyVolume	m2
5	VolCut	13	279668	00_OnlyVolume	m2
5	VolCut	14	302935	00_OnlyVolume	m2
5	VolCut	15	305457	00_OnlyVolume	m2
5	VolCut	16	274912	00_OnlyVolume	m2
5	VolCut	17	257040	00_OnlyVolume	m2
5	VolCut	18	282744	00_OnlyVolume	m2
5	VolCut	19	311018	00_OnlyVolume	m2
5	VolCut	20	342120	00_OnlyVolume	m2
5	VolCut	21	307908	00_OnlyVolume	m2
6	DscTmbRev	1	4.02962e+07	00_OnlyVolume	m3
6	DscTmbRev	2	3.42137e+07	00_OnlyVolume	m3
6	DscTmbRev	3	2.90494e+07	00_OnlyVolume	m3
6	DscTmbRev	4	2.46646e+07	00_OnlyVolume	m3
6	DscTmbRev	5	2.09416e+07	00_OnlyVolume	m3
6	DscTmbRev	6	1.77806e+07	00_OnlyVolume	m3
6	DscTmbRev	7	1.84516e+07	00_OnlyVolume	m3
6	DscTmbRev	8	1.91479e+07	00_OnlyVolume	m3
6	DscTmbRev	9	1.98704e+07	00_OnlyVolume	m3
6	DscTmbRev	10	1.68711e+07	00_OnlyVolume	m3
6	DscTmbRev	11	1.68098e+07	00_OnlyVolume	m3
6	DscTmbRev	12	1.42725e+07	00_OnlyVolume	m3
6	DscTmbRev	13	1.31119e+07	00_OnlyVolume	m3
6	DscTmbRev	14	1.33989e+07	00_OnlyVolume	m3
6	DscTmbRev	15	1.27457e+07	00_OnlyVolume	m3
6	DscTmbRev	16	1.08218e+07	00_OnlyVolume	m3
6	DscTmbRev	17	9.54555e+06	00_OnlyVolume	m3
6	DscTmbRev	18	9.90576e+06	00_OnlyVolume	m3
6	DscTmbRev	19	1.02796e+07	00_OnlyVolume	m3
6	DscTmbRev	20	1.06675e+07	00_OnlyVolume	m3
6	DscTmbRev	21	1.58175e+08	00_OnlyVolume	m3
6	VolCut	1	427139	00_OnlyVolume	m3
6	VolCut	2	384426	00_OnlyVolume	m3
6	VolCut	3	345983	00_OnlyVolume	m3
6	VolCut	4	311385	00_OnlyVolume	m3
6	VolCut	5	280246	00_OnlyVolume	m3
6	VolCut	6	252222	00_OnlyVolume	m3
6	VolCut	7	277444	00_OnlyVolume	m3
6	VolCut	8	305188	00_OnlyVolume	m3
6	VolCut	9	335707	00_OnlyVolume	m3
6	VolCut	10	302136	00_OnlyVolume	m3
6	VolCut	11	319101	00_OnlyVolume	m3
6	VolCut	12	287190	00_OnlyVolume	m3
6	VolCut	13	279668	00_OnlyVolume	m3
6	VolCut	14	302935	00_OnlyVolume	m3
6	VolCut	15	305457	00_OnlyVolume	m3
6	VolCut	16	274912	00_OnlyVolume	m3
6	VolCut	17	257040	00_OnlyVolume	m3
6	VolCut	18	282744	00_OnlyVolume	m3
6	VolCut	19	311018	00_OnlyVolume	m3
6	VolCut	20	342120	00_OnlyVolume	m3
6	VolCut	21	307908	00_OnlyVolume	m3
1	DscTmbCst	1	2.04653e+07	01_Inventory	m1
1	DscTmbCst	2	1.83169e+07	01_Inventory	m1
1	DscTmbCst	3	1.48253e+07	01_Inventory	m1
1	DscTmbCst	4	1.56429e+07	01_Inventory	m1
1	DscTmbCst	5	1.47848e+07	01_Inventory	m1
1	DscTmbCst	6	1.30655e+07	01_Inventory	m1
1	DscTmbCst	7	8.47803e+06	01_Inventory	m1
1	DscTmbCst	8	8.40236e+06	01_Inventory	m1
1	DscTmbCst	9	7.24619e+06	01_Inventory	m1
1	DscTmbCst	10	7.62931e+06	01_Inventory	m1
1	DscTmbCst	11	6.6683e+06	01_Inventory	m1
1	DscTmbCst	12	6.95663e+06	01_Inventory	m1
1	DscTmbCst	13	9.12728e+06	01_Inventory	m1
1	DscTmbCst	14	7.06346e+06	01_Inventory	m1
1	DscTmbCst	15	6.87017e+06	01_Inventory	m1
1	DscTmbCst	16	6.18023e+06	01_Inventory	m1
1	DscTmbCst	17	6.80728e+06	01_Inventory	m1
1	DscTmbCst	18	6.86893e+06	01_Inventory	m1
1	DscTmbCst	19	6.53235e+06	01_Inventory	m1
1	DscTmbCst	20	6.2732e+06	01_Inventory	m1
1	DscTmbCst	21	5.82539e+06	01_Inventory	m1
1	DscTmbRev	1	4.02733e+07	01_Inventory	m1
1	DscTmbRev	2	3.41943e+07	01_Inventory	m1
1	DscTmbRev	3	2.90329e+07	01_Inventory	m1
1	DscTmbRev	4	2.46506e+07	01_Inventory	m1
1	DscTmbRev	5	2.09298e+07	01_Inventory	m1
1	DscTmbRev	6	1.77705e+07	01_Inventory	m1
1	DscTmbRev	7	1.84411e+07	01_Inventory	m1
1	DscTmbRev	8	1.5699e+07	01_Inventory	m1
1	DscTmbRev	9	1.33293e+07	01_Inventory	m1
1	DscTmbRev	10	1.38323e+07	01_Inventory	m1
1	DscTmbRev	11	1.43543e+07	01_Inventory	m1
1	DscTmbRev	12	1.34497e+07	01_Inventory	m1
1	DscTmbRev	13	1.39573e+07	01_Inventory	m1
1	DscTmbRev	14	1.18505e+07	01_Inventory	m1
1	DscTmbRev	15	1.00618e+07	01_Inventory	m1
1	DscTmbRev	16	1.04414e+07	01_Inventory	m1
1	DscTmbRev	17	9.40154e+06	01_Inventory	m1
1	DscTmbRev	18	9.75632e+06	01_Inventory	m1
1	DscTmbRev	19	1.01245e+07	01_Inventory	m1
1	DscTmbRev	20	9.99563e+06	01_Inventory	m1
1	DscTmbRev	21	1.56633e+08	01_Inventory	m1
1	Inventory	1	1.98302e+06	01_Inventory	m1
1	Inventory	2	1.91411e+06	01_Inventory	m1
1	Inventory	3	1.85389e+06	01_Inventory	m1
1	Inventory	4	1.85255e+06	01_Inventory	m1
1	Inventory	5	1.88384e+06	01_Inventory	m1
1	Inventory	6	1.92708e+06	01_Inventory	m1
1	Inventory	7	1.91744e+06	01_Inventory	m1
1	Inventory	8	1.94438e+06	01_Inventory	m1
1	Inventory	9	1.98597e+06	01_Inventory	m1
1	Inventory	10	2.03153e+06	01_Inventory	m1
1	Inventory	11	2.04689e+06	01_Inventory	m1
1	Inventory	12	2.05409e+06	01_Inventory	m1
1	Inventory	13	2.01496e+06	01_Inventory	m1
1	Inventory	14	2.01975e+06	01_Inventory	m1
1	Inventory	15	2.05539e+06	01_Inventory	m1
1	Inventory	16	2.08209e+06	01_Inventory	m1
1	Inventory	17	2.14203e+06	01_Inventory	m1
1	Inventory	18	2.14354e+06	01_Inventory	m1
1	Inventory	19	2.09945e+06	01_Inventory	m1
1	Inventory	20	2.02998e+06	01_Inventory	m1
1	Inventory	21	1.98302e+06	01_Inventory	m1
1	VolCut	1	426897	01_Inventory	m1
1	VolCut	2	384208	01_Inventory	m1
1	VolCut	3	345787	01_Inventory	m1
1	VolCut	4	311208	01_Inventory	m1
1	VolCut	5	280087	01_Inventory	m1
1	VolCut	6	252079	01_Inventory	m1
1	VolCut	7	277287	01_Inventory	m1
1	VolCut	8	250218	01_Inventory	m1
1	VolCut	9	225196	01_Inventory	m1
1	VolCut	10	247716	01_Inventory	m1
1	VolCut	11	272487	01_Inventory	m1
1	VolCut	12	270635	01_Inventory	m1
1	VolCut	13	297699	01_Inventory	m1
1	VolCut	14	267929	01_Inventory	m1
1	VolCut	15	241136	01_Inventory	m1
1	VolCut	16	265249	01_Inventory	m1
1	VolCut	17	253162	01_Inventory	m1
1	VolCut	18	278478	01_Inventory	m1
1	VolCut	19	306326	01_Inventory	m1
1	VolCut	20	320573	01_Inventory	m1
1	VolCut	21	288516	01_Inventory	m1
2	DscTmbCst	1	2.04653e+07	01_Inventory	m2
2	DscTmbCst	2	1.83169e+07	01_Inventory	m2
2	DscTmbCst	3	1.48253e+07	01_Inventory	m2
2	DscTmbCst	4	1.56429e+07	01_Inventory	m2
2	DscTmbCst	5	1.47848e+07	01_Inventory	m2
2	DscTmbCst	6	1.30655e+07	01_Inventory	m2
2	DscTmbCst	7	8.47803e+06	01_Inventory	m2
2	DscTmbCst	8	8.40236e+06	01_Inventory	m2
2	DscTmbCst	9	7.24619e+06	01_Inventory	m2
2	DscTmbCst	10	7.62931e+06	01_Inventory	m2
2	DscTmbCst	11	6.6683e+06	01_Inventory	m2
2	DscTmbCst	12	6.95663e+06	01_Inventory	m2
2	DscTmbCst	13	9.12728e+06	01_Inventory	m2
2	DscTmbCst	14	7.06346e+06	01_Inventory	m2
2	DscTmbCst	15	6.87017e+06	01_Inventory	m2
2	DscTmbCst	16	6.18023e+06	01_Inventory	m2
2	DscTmbCst	17	6.80728e+06	01_Inventory	m2
2	DscTmbCst	18	6.86893e+06	01_Inventory	m2
2	DscTmbCst	19	6.53235e+06	01_Inventory	m2
2	DscTmbCst	20	6.2732e+06	01_Inventory	m2
2	DscTmbCst	21	5.82539e+06	01_Inventory	m2
2	DscTmbRev	1	4.02733e+07	01_Inventory	m2
2	DscTmbRev	2	3.41943e+07	01_Inventory	m2
2	DscTmbRev	3	2.90329e+07	01_Inventory	m2
2	DscTmbRev	4	2.46506e+07	01_Inventory	m2
2	DscTmbRev	5	2.09298e+07	01_Inventory	m2
2	DscTmbRev	6	1.77705e+07	01_Inventory	m2
2	DscTmbRev	7	1.84411e+07	01_Inventory	m2
2	DscTmbRev	8	1.5699e+07	01_Inventory	m2
2	DscTmbRev	9	1.33293e+07	01_Inventory	m2
2	DscTmbRev	10	1.38323e+07	01_Inventory	m2
2	DscTmbRev	11	1.43543e+07	01_Inventory	m2
2	DscTmbRev	12	1.34497e+07	01_Inventory	m2
2	DscTmbRev	13	1.39573e+07	01_Inventory	m2
2	DscTmbRev	14	1.18505e+07	01_Inventory	m2
2	DscTmbRev	15	1.00618e+07	01_Inventory	m2
2	DscTmbRev	16	1.04414e+07	01_Inventory	m2
2	DscTmbRev	17	9.40154e+06	01_Inventory	m2
2	DscTmbRev	18	9.75632e+06	01_Inventory	m2
2	DscTmbRev	19	1.01245e+07	01_Inventory	m2
2	DscTmbRev	20	9.99563e+06	01_Inventory	m2
2	DscTmbRev	21	1.56633e+08	01_Inventory	m2
2	Inventory	1	1.98302e+06	01_Inventory	m2
2	Inventory	2	1.91411e+06	01_Inventory	m2
2	Inventory	3	1.85389e+06	01_Inventory	m2
2	Inventory	4	1.85255e+06	01_Inventory	m2
2	Inventory	5	1.88384e+06	01_Inventory	m2
2	Inventory	6	1.92708e+06	01_Inventory	m2
2	Inventory	7	1.91744e+06	01_Inventory	m2
2	Inventory	8	1.94438e+06	01_Inventory	m2
2	Inventory	9	1.98597e+06	01_Inventory	m2
2	Inventory	10	2.03153e+06	01_Inventory	m2
2	Inventory	11	2.04689e+06	01_Inventory	m2
2	Inventory	12	2.05409e+06	01_Inventory	m2
2	Inventory	13	2.01496e+06	01_Inventory	m2
2	Inventory	14	2.01975e+06	01_Inventory	m2
2	Inventory	15	2.05539e+06	01_Inventory	m2
2	Inventory	16	2.08209e+06	01_Inventory	m2
2	Inventory	17	2.14203e+06	01_Inventory	m2
2	Inventory	18	2.14354e+06	01_Inventory	m2
2	Inventory	19	2.09945e+06	01_Inventory	m2
2	Inventory	20	2.02998e+06	01_Inventory	m2
2	Inventory	21	1.98302e+06	01_Inventory	m2
2	VolCut	1	426897	01_Inventory	m2
2	VolCut	2	384208	01_Inventory	m2
2	VolCut	3	345787	01_Inventory	m2
2	VolCut	4	311208	01_Inventory	m2
2	VolCut	5	280087	01_Inventory	m2
2	VolCut	6	252079	01_Inventory	m2
2	VolCut	7	277287	01_Inventory	m2
2	VolCut	8	250218	01_Inventory	m2
2	VolCut	9	225196	01_Inventory	m2
2	VolCut	10	247716	01_Inventory	m2
2	VolCut	11	272487	01_Inventory	m2
2	VolCut	12	270635	01_Inventory	m2
2	VolCut	13	297699	01_Inventory	m2
2	VolCut	14	267929	01_Inventory	m2
2	VolCut	15	241136	01_Inventory	m2
2	VolCut	16	265249	01_Inventory	m2
2	VolCut	17	253162	01_Inventory	m2
2	VolCut	18	278478	01_Inventory	m2
2	VolCut	19	306326	01_Inventory	m2
2	VolCut	20	320573	01_Inventory	m2
2	VolCut	21	288516	01_Inventory	m2
3	DscTmbCst	1	2.04653e+07	01_Inventory	m3
3	DscTmbCst	2	1.83169e+07	01_Inventory	m3
3	DscTmbCst	3	1.48253e+07	01_Inventory	m3
3	DscTmbCst	4	1.56429e+07	01_Inventory	m3
3	DscTmbCst	5	1.47848e+07	01_Inventory	m3
3	DscTmbCst	6	1.30655e+07	01_Inventory	m3
3	DscTmbCst	7	8.47803e+06	01_Inventory	m3
3	DscTmbCst	8	8.40236e+06	01_Inventory	m3
3	DscTmbCst	9	7.24619e+06	01_Inventory	m3
3	DscTmbCst	10	7.62931e+06	01_Inventory	m3
3	DscTmbCst	11	6.6683e+06	01_Inventory	m3
3	DscTmbCst	12	6.95663e+06	01_Inventory	m3
3	DscTmbCst	13	9.12728e+06	01_Inventory	m3
3	DscTmbCst	14	7.06346e+06	01_Inventory	m3
3	DscTmbCst	15	6.87017e+06	01_Inventory	m3
3	DscTmbCst	16	6.18023e+06	01_Inventory	m3
3	DscTmbCst	17	6.80728e+06	01_Inventory	m3
3	DscTmbCst	18	6.86893e+06	01_Inventory	m3
3	DscTmbCst	19	6.53235e+06	01_Inventory	m3
3	DscTmbCst	20	6.2732e+06	01_Inventory	m3
3	DscTmbCst	21	5.82539e+06	01_Inventory	m3
3	DscTmbRev	1	4.02733e+07	01_Inventory	m3
3	DscTmbRev	2	3.41943e+07	01_Inventory	m3
3	DscTmbRev	3	2.90329e+07	01_Inventory	m3
3	DscTmbRev	4	2.46506e+07	01_Inventory	m3
3	DscTmbRev	5	2.09298e+07	01_Inventory	m3
3	DscTmbRev	6	1.77705e+07	01_Inventory	m3
3	DscTmbRev	7	1.84411e+07	01_Inventory	m3
3	DscTmbRev	8	1.5699e+07	01_Inventory	m3
3	DscTmbRev	9	1.33293e+07	01_Inventory	m3
3	DscTmbRev	10	1.38323e+07	01_Inventory	m3
3	DscTmbRev	11	1.43543e+07	01_Inventory	m3
3	DscTmbRev	12	1.34497e+07	01_Inventory	m3
3	DscTmbRev	13	1.39573e+07	01_Inventory	m3
3	DscTmbRev	14	1.18505e+07	01_Inventory	m3
3	DscTmbRev	15	1.00618e+07	01_Inventory	m3
3	DscTmbRev	16	1.04414e+07	01_Inventory	m3
3	DscTmbRev	17	9.40154e+06	01_Inventory	m3
3	DscTmbRev	18	9.75632e+06	01_Inventory	m3
3	DscTmbRev	19	1.01245e+07	01_Inventory	m3
3	DscTmbRev	20	9.99563e+06	01_Inventory	m3
3	DscTmbRev	21	1.56633e+08	01_Inventory	m3
3	Inventory	1	1.98302e+06	01_Inventory	m3
3	Inventory	2	1.91411e+06	01_Inventory	m3
3	Inventory	3	1.85389e+06	01_Inventory	m3
3	Inventory	4	1.85255e+06	01_Inventory	m3
3	Inventory	5	1.88384e+06	01_Inventory	m3
3	Inventory	6	1.92708e+06	01_Inventory	m3
3	Inventory	7	1.91744e+06	01_Inventory	m3
3	Inventory	8	1.94438e+06	01_Inventory	m3
3	Inventory	9	1.98597e+06	01_Inventory	m3
3	Inventory	10	2.03153e+06	01_Inventory	m3
3	Inventory	11	2.04689e+06	01_Inventory	m3
3	Inventory	12	2.05409e+06	01_Inventory	m3
3	Inventory	13	2.01496e+06	01_Inventory	m3
3	Inventory	14	2.01975e+06	01_Inventory	m3
3	Inventory	15	2.05539e+06	01_Inventory	m3
3	Inventory	16	2.08209e+06	01_Inventory	m3
3	Inventory	17	2.14203e+06	01_Inventory	m3
3	Inventory	18	2.14354e+06	01_Inventory	m3
3	Inventory	19	2.09945e+06	01_Inventory	m3
3	Inventory	20	2.02998e+06	01_Inventory	m3
3	Inventory	21	1.98302e+06	01_Inventory	m3
3	VolCut	1	426897	01_Inventory	m3
3	VolCut	2	384208	01_Inventory	m3
3	VolCut	3	345787	01_Inventory	m3
3	VolCut	4	311208	01_Inventory	m3
3	VolCut	5	280087	01_Inventory	m3
3	VolCut	6	252079	01_Inventory	m3
3	VolCut	7	277287	01_Inventory	m3
3	VolCut	8	250218	01_Inventory	m3
3	VolCut	9	225196	01_Inventory	m3
3	VolCut	10	247716	01_Inventory	m3
3	VolCut	11	272487	01_Inventory	m3
3	VolCut	12	270635	01_Inventory	m3
3	VolCut	13	297699	01_Inventory	m3
3	VolCut	14	267929	01_Inventory	m3
3	VolCut	15	241136	01_Inventory	m3
3	VolCut	16	265249	01_Inventory	m3
3	VolCut	17	253162	01_Inventory	m3
3	VolCut	18	278478	01_Inventory	m3
3	VolCut	19	306326	01_Inventory	m3
3	VolCut	20	320573	01_Inventory	m3
3	VolCut	21	288516	01_Inventory	m3
7	DscTmbCst	1	2.05036e+07	01_NPV	m1
7	DscTmbCst	2	1.82876e+07	01_NPV	m1
7	DscTmbCst	3	1.50216e+07	01_NPV	m1
7	DscTmbCst	4	1.56556e+07	01_NPV	m1
7	DscTmbCst	5	1.4909e+07	01_NPV	m1
7	DscTmbCst	6	1.29734e+07	01_NPV	m1
7	DscTmbCst	7	8.4695e+06	01_NPV	m1
7	DscTmbCst	8	8.38598e+06	01_NPV	m1
7	DscTmbCst	9	6.99002e+06	01_NPV	m1
7	DscTmbCst	10	7.38465e+06	01_NPV	m1
7	DscTmbCst	11	6.5378e+06	01_NPV	m1
7	DscTmbCst	12	7.36113e+06	01_NPV	m1
7	DscTmbCst	13	9.40822e+06	01_NPV	m1
7	DscTmbCst	14	7.29016e+06	01_NPV	m1
7	DscTmbCst	15	7.28821e+06	01_NPV	m1
7	DscTmbCst	16	5.91016e+06	01_NPV	m1
7	DscTmbCst	17	6.78456e+06	01_NPV	m1
7	DscTmbCst	18	6.60121e+06	01_NPV	m1
7	DscTmbCst	19	6.52323e+06	01_NPV	m1
7	DscTmbCst	20	6.47836e+06	01_NPV	m1
7	DscTmbCst	21	6.83303e+06	01_NPV	m1
7	DscTmbRev	1	4.02822e+07	01_NPV	m1
7	DscTmbRev	2	3.42019e+07	01_NPV	m1
7	DscTmbRev	3	2.90393e+07	01_NPV	m1
7	DscTmbRev	4	2.4656e+07	01_NPV	m1
7	DscTmbRev	5	2.09344e+07	01_NPV	m1
7	DscTmbRev	6	1.77745e+07	01_NPV	m1
7	DscTmbRev	7	1.84452e+07	01_NPV	m1
7	DscTmbRev	8	1.5661e+07	01_NPV	m1
7	DscTmbRev	9	1.32971e+07	01_NPV	m1
7	DscTmbRev	10	1.35619e+07	01_NPV	m1
7	DscTmbRev	11	1.40737e+07	01_NPV	m1
7	DscTmbRev	12	1.4037e+07	01_NPV	m1
7	DscTmbRev	13	1.45667e+07	01_NPV	m1
7	DscTmbRev	14	1.23679e+07	01_NPV	m1
7	DscTmbRev	15	1.05011e+07	01_NPV	m1
7	DscTmbRev	16	9.04157e+06	01_NPV	m1
7	DscTmbRev	17	9.38276e+06	01_NPV	m1
7	DscTmbRev	18	9.73683e+06	01_NPV	m1
7	DscTmbRev	19	1.01043e+07	01_NPV	m1
7	DscTmbRev	20	1.04855e+07	01_NPV	m1
7	DscTmbRev	21	1.58427e+08	01_NPV	m1
7	VolCut	1	426991	01_NPV	m1
7	VolCut	2	384292	01_NPV	m1
7	VolCut	3	345863	01_NPV	m1
7	VolCut	4	311277	01_NPV	m1
7	VolCut	5	280149	01_NPV	m1
7	VolCut	6	252134	01_NPV	m1
7	VolCut	7	277348	01_NPV	m1
7	VolCut	8	249613	01_NPV	m1
7	VolCut	9	224651	01_NPV	m1
7	VolCut	10	242873	01_NPV	m1
7	VolCut	11	267161	01_NPV	m1
7	VolCut	12	282452	01_NPV	m1
7	VolCut	13	310697	01_NPV	m1
7	VolCut	14	279627	01_NPV	m1
7	VolCut	15	251665	01_NPV	m1
7	VolCut	16	229688	01_NPV	m1
7	VolCut	17	252656	01_NPV	m1
7	VolCut	18	277922	01_NPV	m1
7	VolCut	19	305714	01_NPV	m1
7	VolCut	20	336286	01_NPV	m1
7	VolCut	21	369914	01_NPV	m1
8	DscTmbCst	1	2.05036e+07	01_NPV	m2
8	DscTmbCst	2	1.82876e+07	01_NPV	m2
8	DscTmbCst	3	1.50216e+07	01_NPV	m2
8	DscTmbCst	4	1.56556e+07	01_NPV	m2
8	DscTmbCst	5	1.4909e+07	01_NPV	m2
8	DscTmbCst	6	1.29734e+07	01_NPV	m2
8	DscTmbCst	7	8.4695e+06	01_NPV	m2
8	DscTmbCst	8	8.38598e+06	01_NPV	m2
8	DscTmbCst	9	6.99002e+06	01_NPV	m2
8	DscTmbCst	10	7.38465e+06	01_NPV	m2
8	DscTmbCst	11	6.5378e+06	01_NPV	m2
8	DscTmbCst	12	7.36113e+06	01_NPV	m2
8	DscTmbCst	13	9.40822e+06	01_NPV	m2
8	DscTmbCst	14	7.29016e+06	01_NPV	m2
8	DscTmbCst	15	7.28821e+06	01_NPV	m2
8	DscTmbCst	16	5.91016e+06	01_NPV	m2
8	DscTmbCst	17	6.78456e+06	01_NPV	m2
8	DscTmbCst	18	6.60121e+06	01_NPV	m2
8	DscTmbCst	19	6.52323e+06	01_NPV	m2
8	DscTmbCst	20	6.47836e+06	01_NPV	m2
8	DscTmbCst	21	6.83303e+06	01_NPV	m2
8	DscTmbRev	1	4.02822e+07	01_NPV	m2
8	DscTmbRev	2	3.42019e+07	01_NPV	m2
8	DscTmbRev	3	2.90393e+07	01_NPV	m2
8	DscTmbRev	4	2.4656e+07	01_NPV	m2
8	DscTmbRev	5	2.09344e+07	01_NPV	m2
8	DscTmbRev	6	1.77745e+07	01_NPV	m2
8	DscTmbRev	7	1.84452e+07	01_NPV	m2
8	DscTmbRev	8	1.5661e+07	01_NPV	m2
8	DscTmbRev	9	1.32971e+07	01_NPV	m2
8	DscTmbRev	10	1.35619e+07	01_NPV	m2
8	DscTmbRev	11	1.40737e+07	01_NPV	m2
8	DscTmbRev	12	1.4037e+07	01_NPV	m2
8	DscTmbRev	13	1.45667e+07	01_NPV	m2
8	DscTmbRev	14	1.23679e+07	01_NPV	m2
8	DscTmbRev	15	1.05011e+07	01_NPV	m2
8	DscTmbRev	16	9.04157e+06	01_NPV	m2
8	DscTmbRev	17	9.38276e+06	01_NPV	m2
8	DscTmbRev	18	9.73683e+06	01_NPV	m2
8	DscTmbRev	19	1.01043e+07	01_NPV	m2
8	DscTmbRev	20	1.04855e+07	01_NPV	m2
8	DscTmbRev	21	1.58427e+08	01_NPV	m2
8	VolCut	1	426991	01_NPV	m2
8	VolCut	2	384292	01_NPV	m2
8	VolCut	3	345863	01_NPV	m2
8	VolCut	4	311277	01_NPV	m2
8	VolCut	5	280149	01_NPV	m2
8	VolCut	6	252134	01_NPV	m2
8	VolCut	7	277348	01_NPV	m2
8	VolCut	8	249613	01_NPV	m2
8	VolCut	9	224651	01_NPV	m2
8	VolCut	10	242873	01_NPV	m2
8	VolCut	11	267161	01_NPV	m2
8	VolCut	12	282452	01_NPV	m2
8	VolCut	13	310697	01_NPV	m2
8	VolCut	14	279627	01_NPV	m2
8	VolCut	15	251665	01_NPV	m2
8	VolCut	16	229688	01_NPV	m2
8	VolCut	17	252656	01_NPV	m2
8	VolCut	18	277922	01_NPV	m2
8	VolCut	19	305714	01_NPV	m2
8	VolCut	20	336286	01_NPV	m2
8	VolCut	21	369914	01_NPV	m2
9	DscTmbCst	1	2.05036e+07	01_NPV	m3
9	DscTmbCst	2	1.82876e+07	01_NPV	m3
9	DscTmbCst	3	1.50216e+07	01_NPV	m3
9	DscTmbCst	4	1.56556e+07	01_NPV	m3
9	DscTmbCst	5	1.4909e+07	01_NPV	m3
9	DscTmbCst	6	1.29734e+07	01_NPV	m3
9	DscTmbCst	7	8.4695e+06	01_NPV	m3
9	DscTmbCst	8	8.38598e+06	01_NPV	m3
9	DscTmbCst	9	6.99002e+06	01_NPV	m3
9	DscTmbCst	10	7.38465e+06	01_NPV	m3
9	DscTmbCst	11	6.5378e+06	01_NPV	m3
9	DscTmbCst	12	7.36113e+06	01_NPV	m3
9	DscTmbCst	13	9.40822e+06	01_NPV	m3
9	DscTmbCst	14	7.29016e+06	01_NPV	m3
9	DscTmbCst	15	7.28821e+06	01_NPV	m3
9	DscTmbCst	16	5.91016e+06	01_NPV	m3
9	DscTmbCst	17	6.78456e+06	01_NPV	m3
9	DscTmbCst	18	6.60121e+06	01_NPV	m3
9	DscTmbCst	19	6.52323e+06	01_NPV	m3
9	DscTmbCst	20	6.47836e+06	01_NPV	m3
9	DscTmbCst	21	6.83303e+06	01_NPV	m3
9	DscTmbRev	1	4.02822e+07	01_NPV	m3
9	DscTmbRev	2	3.42019e+07	01_NPV	m3
9	DscTmbRev	3	2.90393e+07	01_NPV	m3
9	DscTmbRev	4	2.4656e+07	01_NPV	m3
9	DscTmbRev	5	2.09344e+07	01_NPV	m3
9	DscTmbRev	6	1.77745e+07	01_NPV	m3
9	DscTmbRev	7	1.84452e+07	01_NPV	m3
9	DscTmbRev	8	1.5661e+07	01_NPV	m3
9	DscTmbRev	9	1.32971e+07	01_NPV	m3
9	DscTmbRev	10	1.35619e+07	01_NPV	m3
9	DscTmbRev	11	1.40737e+07	01_NPV	m3
9	DscTmbRev	12	1.4037e+07	01_NPV	m3
9	DscTmbRev	13	1.45667e+07	01_NPV	m3
9	DscTmbRev	14	1.23679e+07	01_NPV	m3
9	DscTmbRev	15	1.05011e+07	01_NPV	m3
9	DscTmbRev	16	9.04157e+06	01_NPV	m3
9	DscTmbRev	17	9.38276e+06	01_NPV	m3
9	DscTmbRev	18	9.73683e+06	01_NPV	m3
9	DscTmbRev	19	1.01043e+07	01_NPV	m3
9	DscTmbRev	20	1.04855e+07	01_NPV	m3
9	DscTmbRev	21	1.58427e+08	01_NPV	m3
9	VolCut	1	426991	01_NPV	m3
9	VolCut	2	384292	01_NPV	m3
9	VolCut	3	345863	01_NPV	m3
9	VolCut	4	311277	01_NPV	m3
9	VolCut	5	280149	01_NPV	m3
9	VolCut	6	252134	01_NPV	m3
9	VolCut	7	277348	01_NPV	m3
9	VolCut	8	249613	01_NPV	m3
9	VolCut	9	224651	01_NPV	m3
9	VolCut	10	242873	01_NPV	m3
9	VolCut	11	267161	01_NPV	m3
9	VolCut	12	282452	01_NPV	m3
9	VolCut	13	310697	01_NPV	m3
9	VolCut	14	279627	01_NPV	m3
9	VolCut	15	251665	01_NPV	m3
9	VolCut	16	229688	01_NPV	m3
9	VolCut	17	252656	01_NPV	m3
9	VolCut	18	277922	01_NPV	m3
9	VolCut	19	305714	01_NPV	m3
9	VolCut	20	336286	01_NPV	m3
9	VolCut	21	369914	01_NPV	m3
10	CRemoved	1	364120	02_Carbon	m1
10	CRemoved	2	388405	02_Carbon	m1
10	CRemoved	3	353927	02_Carbon	m1
10	CRemoved	4	371129	02_Carbon	m1
10	CRemoved	5	370413	02_Carbon	m1
10	CRemoved	6	354092	02_Carbon	m1
10	CRemoved	7	335789	02_Carbon	m1
10	CRemoved	8	312992	02_Carbon	m1
10	CRemoved	9	312992	02_Carbon	m1
10	CRemoved	10	312992	02_Carbon	m1
10	CRemoved	11	312992	02_Carbon	m1
10	CRemoved	12	312992	02_Carbon	m1
10	CRemoved	13	312992	02_Carbon	m1
10	CRemoved	14	312992	02_Carbon	m1
10	CRemoved	15	312992	02_Carbon	m1
10	CRemoved	16	312992	02_Carbon	m1
10	CRemoved	17	312992	02_Carbon	m1
10	CRemoved	18	312992	02_Carbon	m1
10	CRemoved	19	312992	02_Carbon	m1
10	CRemoved	20	312992	02_Carbon	m1
10	CRemoved	21	312992	02_Carbon	m1
10	DscCosts	1	5.56702e+07	02_Carbon	m1
10	DscCosts	2	5.0477e+07	02_Carbon	m1
10	DscCosts	3	4.24399e+07	02_Carbon	m1
10	DscCosts	4	3.84653e+07	02_Carbon	m1
10	DscCosts	5	3.4161e+07	02_Carbon	m1
10	DscCosts	6	3.00896e+07	02_Carbon	m1
10	DscCosts	7	2.4655e+07	02_Carbon	m1
10	DscCosts	8	2.45088e+07	02_Carbon	m1
10	DscCosts	9	2.41041e+07	02_Carbon	m1
10	DscCosts	10	2.41626e+07	02_Carbon	m1
10	DscCosts	11	2.02697e+07	02_Carbon	m1
10	DscCosts	12	1.75259e+07	02_Carbon	m1
10	DscCosts	13	1.51401e+07	02_Carbon	m1
10	DscCosts	14	1.76634e+07	02_Carbon	m1
10	DscCosts	15	1.75631e+07	02_Carbon	m1
10	DscCosts	16	1.82022e+07	02_Carbon	m1
10	DscCosts	17	1.57581e+07	02_Carbon	m1
10	DscCosts	18	1.34014e+07	02_Carbon	m1
10	DscCosts	19	1.17339e+07	02_Carbon	m1
10	DscCosts	20	9.87391e+06	02_Carbon	m1
10	DscCosts	21	8.51711e+06	02_Carbon	m1
10	DscRevenue	1	8.14332e+07	02_Carbon	m1
10	DscRevenue	2	7.56238e+07	02_Carbon	m1
10	DscRevenue	3	6.46484e+07	02_Carbon	m1
10	DscRevenue	4	5.98894e+07	02_Carbon	m1
10	DscRevenue	5	5.41132e+07	02_Carbon	m1
10	DscRevenue	6	4.7698e+07	02_Carbon	m1
10	DscRevenue	7	4.25335e+07	02_Carbon	m1
10	DscRevenue	8	3.98939e+07	02_Carbon	m1
10	DscRevenue	9	3.81429e+07	02_Carbon	m1
10	DscRevenue	10	3.7485e+07	02_Carbon	m1
10	DscRevenue	11	3.38055e+07	02_Carbon	m1
10	DscRevenue	12	3.05693e+07	02_Carbon	m1
10	DscRevenue	13	2.80662e+07	02_Carbon	m1
10	DscRevenue	14	2.74641e+07	02_Carbon	m1
10	DscRevenue	15	2.69333e+07	02_Carbon	m1
10	DscRevenue	16	2.64711e+07	02_Carbon	m1
10	DscRevenue	17	2.38703e+07	02_Carbon	m1
10	DscRevenue	18	2.15831e+07	02_Carbon	m1
10	DscRevenue	19	1.95666e+07	02_Carbon	m1
10	DscRevenue	20	1.77843e+07	02_Carbon	m1
10	DscRevenue	21	1.62502e+08	02_Carbon	m1
10	VolCut	1	426248	02_Carbon	m1
10	VolCut	2	383623	02_Carbon	m1
10	VolCut	3	345261	02_Carbon	m1
10	VolCut	4	310735	02_Carbon	m1
10	VolCut	5	279661	02_Carbon	m1
10	VolCut	6	251695	02_Carbon	m1
10	VolCut	7	236599	02_Carbon	m1
10	VolCut	8	260259	02_Carbon	m1
10	VolCut	9	268827	02_Carbon	m1
10	VolCut	10	295710	02_Carbon	m1
10	VolCut	11	266139	02_Carbon	m1
10	VolCut	12	239525	02_Carbon	m1
10	VolCut	13	223043	02_Carbon	m1
10	VolCut	14	245347	02_Carbon	m1
10	VolCut	15	269882	02_Carbon	m1
10	VolCut	16	296870	02_Carbon	m1
10	VolCut	17	267183	02_Carbon	m1
10	VolCut	18	240465	02_Carbon	m1
10	VolCut	19	216418	02_Carbon	m1
10	VolCut	20	194776	02_Carbon	m1
10	VolCut	21	175299	02_Carbon	m1
11	CRemoved	1	364120	02_Carbon	m2
11	CRemoved	2	388405	02_Carbon	m2
11	CRemoved	3	353927	02_Carbon	m2
11	CRemoved	4	371129	02_Carbon	m2
11	CRemoved	5	370413	02_Carbon	m2
11	CRemoved	6	354092	02_Carbon	m2
11	CRemoved	7	335789	02_Carbon	m2
11	CRemoved	8	312992	02_Carbon	m2
11	CRemoved	9	312992	02_Carbon	m2
11	CRemoved	10	312992	02_Carbon	m2
11	CRemoved	11	312992	02_Carbon	m2
11	CRemoved	12	312992	02_Carbon	m2
11	CRemoved	13	312992	02_Carbon	m2
11	CRemoved	14	312992	02_Carbon	m2
11	CRemoved	15	312992	02_Carbon	m2
11	CRemoved	16	312992	02_Carbon	m2
11	CRemoved	17	312992	02_Carbon	m2
11	CRemoved	18	312992	02_Carbon	m2
11	CRemoved	19	312992	02_Carbon	m2
11	CRemoved	20	312992	02_Carbon	m2
11	CRemoved	21	312992	02_Carbon	m2
11	DscCosts	1	5.56702e+07	02_Carbon	m2
11	DscCosts	2	5.0477e+07	02_Carbon	m2
11	DscCosts	3	4.24399e+07	02_Carbon	m2
11	DscCosts	4	3.84653e+07	02_Carbon	m2
11	DscCosts	5	3.4161e+07	02_Carbon	m2
11	DscCosts	6	3.00896e+07	02_Carbon	m2
11	DscCosts	7	2.4655e+07	02_Carbon	m2
11	DscCosts	8	2.45088e+07	02_Carbon	m2
11	DscCosts	9	2.41041e+07	02_Carbon	m2
11	DscCosts	10	2.41626e+07	02_Carbon	m2
11	DscCosts	11	2.02697e+07	02_Carbon	m2
11	DscCosts	12	1.75259e+07	02_Carbon	m2
11	DscCosts	13	1.51401e+07	02_Carbon	m2
11	DscCosts	14	1.76634e+07	02_Carbon	m2
11	DscCosts	15	1.75631e+07	02_Carbon	m2
11	DscCosts	16	1.82022e+07	02_Carbon	m2
11	DscCosts	17	1.57581e+07	02_Carbon	m2
11	DscCosts	18	1.34014e+07	02_Carbon	m2
11	DscCosts	19	1.17339e+07	02_Carbon	m2
11	DscCosts	20	9.87391e+06	02_Carbon	m2
11	DscCosts	21	8.51711e+06	02_Carbon	m2
11	DscRevenue	1	8.14332e+07	02_Carbon	m2
11	DscRevenue	2	7.56238e+07	02_Carbon	m2
11	DscRevenue	3	6.46484e+07	02_Carbon	m2
11	DscRevenue	4	5.98894e+07	02_Carbon	m2
11	DscRevenue	5	5.41132e+07	02_Carbon	m2
11	DscRevenue	6	4.7698e+07	02_Carbon	m2
11	DscRevenue	7	4.25335e+07	02_Carbon	m2
11	DscRevenue	8	3.98939e+07	02_Carbon	m2
11	DscRevenue	9	3.81429e+07	02_Carbon	m2
11	DscRevenue	10	3.7485e+07	02_Carbon	m2
11	DscRevenue	11	3.38055e+07	02_Carbon	m2
11	DscRevenue	12	3.05693e+07	02_Carbon	m2
11	DscRevenue	13	2.80662e+07	02_Carbon	m2
11	DscRevenue	14	2.74641e+07	02_Carbon	m2
11	DscRevenue	15	2.69333e+07	02_Carbon	m2
11	DscRevenue	16	2.64711e+07	02_Carbon	m2
11	DscRevenue	17	2.38703e+07	02_Carbon	m2
11	DscRevenue	18	2.15831e+07	02_Carbon	m2
11	DscRevenue	19	1.95666e+07	02_Carbon	m2
11	DscRevenue	20	1.77843e+07	02_Carbon	m2
11	DscRevenue	21	1.62502e+08	02_Carbon	m2
11	VolCut	1	426248	02_Carbon	m2
11	VolCut	2	383623	02_Carbon	m2
11	VolCut	3	345261	02_Carbon	m2
11	VolCut	4	310735	02_Carbon	m2
11	VolCut	5	279661	02_Carbon	m2
11	VolCut	6	251695	02_Carbon	m2
11	VolCut	7	236599	02_Carbon	m2
11	VolCut	8	260259	02_Carbon	m2
11	VolCut	9	268827	02_Carbon	m2
11	VolCut	10	295710	02_Carbon	m2
11	VolCut	11	266139	02_Carbon	m2
11	VolCut	12	239525	02_Carbon	m2
11	VolCut	13	223043	02_Carbon	m2
11	VolCut	14	245347	02_Carbon	m2
11	VolCut	15	269882	02_Carbon	m2
11	VolCut	16	296870	02_Carbon	m2
11	VolCut	17	267183	02_Carbon	m2
11	VolCut	18	240465	02_Carbon	m2
11	VolCut	19	216418	02_Carbon	m2
11	VolCut	20	194776	02_Carbon	m2
11	VolCut	21	175299	02_Carbon	m2
12	CRemoved	1	364120	02_Carbon	m3
12	CRemoved	2	388405	02_Carbon	m3
12	CRemoved	3	353927	02_Carbon	m3
12	CRemoved	4	371129	02_Carbon	m3
12	CRemoved	5	370413	02_Carbon	m3
12	CRemoved	6	354092	02_Carbon	m3
12	CRemoved	7	335789	02_Carbon	m3
12	CRemoved	8	312992	02_Carbon	m3
12	CRemoved	9	312992	02_Carbon	m3
12	CRemoved	10	312992	02_Carbon	m3
12	CRemoved	11	312992	02_Carbon	m3
12	CRemoved	12	312992	02_Carbon	m3
12	CRemoved	13	312992	02_Carbon	m3
12	CRemoved	14	312992	02_Carbon	m3
12	CRemoved	15	312992	02_Carbon	m3
12	CRemoved	16	312992	02_Carbon	m3
12	CRemoved	17	312992	02_Carbon	m3
12	CRemoved	18	312992	02_Carbon	m3
12	CRemoved	19	312992	02_Carbon	m3
12	CRemoved	20	312992	02_Carbon	m3
12	CRemoved	21	312992	02_Carbon	m3
12	DscCosts	1	5.56702e+07	02_Carbon	m3
12	DscCosts	2	5.0477e+07	02_Carbon	m3
12	DscCosts	3	4.24399e+07	02_Carbon	m3
12	DscCosts	4	3.84653e+07	02_Carbon	m3
12	DscCosts	5	3.4161e+07	02_Carbon	m3
12	DscCosts	6	3.00896e+07	02_Carbon	m3
12	DscCosts	7	2.4655e+07	02_Carbon	m3
12	DscCosts	8	2.45088e+07	02_Carbon	m3
12	DscCosts	9	2.41041e+07	02_Carbon	m3
12	DscCosts	10	2.41626e+07	02_Carbon	m3
12	DscCosts	11	2.02697e+07	02_Carbon	m3
12	DscCosts	12	1.75259e+07	02_Carbon	m3
12	DscCosts	13	1.51401e+07	02_Carbon	m3
12	DscCosts	14	1.76634e+07	02_Carbon	m3
12	DscCosts	15	1.75631e+07	02_Carbon	m3
12	DscCosts	16	1.82022e+07	02_Carbon	m3
12	DscCosts	17	1.57581e+07	02_Carbon	m3
12	DscCosts	18	1.34014e+07	02_Carbon	m3
12	DscCosts	19	1.17339e+07	02_Carbon	m3
12	DscCosts	20	9.87391e+06	02_Carbon	m3
12	DscCosts	21	8.51711e+06	02_Carbon	m3
12	DscRevenue	1	8.14332e+07	02_Carbon	m3
12	DscRevenue	2	7.56238e+07	02_Carbon	m3
12	DscRevenue	3	6.46484e+07	02_Carbon	m3
12	DscRevenue	4	5.98894e+07	02_Carbon	m3
12	DscRevenue	5	5.41132e+07	02_Carbon	m3
12	DscRevenue	6	4.7698e+07	02_Carbon	m3
12	DscRevenue	7	4.25335e+07	02_Carbon	m3
12	DscRevenue	8	3.98939e+07	02_Carbon	m3
12	DscRevenue	9	3.81429e+07	02_Carbon	m3
12	DscRevenue	10	3.7485e+07	02_Carbon	m3
12	DscRevenue	11	3.38055e+07	02_Carbon	m3
12	DscRevenue	12	3.05693e+07	02_Carbon	m3
12	DscRevenue	13	2.80662e+07	02_Carbon	m3
12	DscRevenue	14	2.74641e+07	02_Carbon	m3
12	DscRevenue	15	2.69333e+07	02_Carbon	m3
12	DscRevenue	16	2.64711e+07	02_Carbon	m3
12	DscRevenue	17	2.38703e+07	02_Carbon	m3
12	DscRevenue	18	2.15831e+07	02_Carbon	m3
12	DscRevenue	19	1.95666e+07	02_Carbon	m3
12	DscRevenue	20	1.77843e+07	02_Carbon	m3
12	DscRevenue	21	1.62502e+08	02_Carbon	m3
12	VolCut	1	426248	02_Carbon	m3
12	VolCut	2	383623	02_Carbon	m3
12	VolCut	3	345261	02_Carbon	m3
12	VolCut	4	310735	02_Carbon	m3
12	VolCut	5	279661	02_Carbon	m3
12	VolCut	6	251695	02_Carbon	m3
12	VolCut	7	236599	02_Carbon	m3
12	VolCut	8	260259	02_Carbon	m3
12	VolCut	9	268827	02_Carbon	m3
12	VolCut	10	295710	02_Carbon	m3
12	VolCut	11	266139	02_Carbon	m3
12	VolCut	12	239525	02_Carbon	m3
12	VolCut	13	223043	02_Carbon	m3
12	VolCut	14	245347	02_Carbon	m3
12	VolCut	15	269882	02_Carbon	m3
12	VolCut	16	296870	02_Carbon	m3
12	VolCut	17	267183	02_Carbon	m3
12	VolCut	18	240465	02_Carbon	m3
12	VolCut	19	216418	02_Carbon	m3
12	VolCut	20	194776	02_Carbon	m3
12	VolCut	21	175299	02_Carbon	m3
13	AgeControl	1	4.84435	03_Water1	m1
13	AgeControl	2	4.84554	03_Water1	m1
13	AgeControl	3	4.86597	03_Water1	m1
13	AgeControl	4	5.0807	03_Water1	m1
13	AgeControl	5	5.31658	03_Water1	m1
13	AgeControl	6	5.56066	03_Water1	m1
13	AgeControl	7	6.01106	03_Water1	m1
13	AgeControl	8	6.36444	03_Water1	m1
13	AgeControl	9	6.69244	03_Water1	m1
13	AgeControl	10	6.86896	03_Water1	m1
13	AgeControl	11	7.14062	03_Water1	m1
13	AgeControl	12	7.4301	03_Water1	m1
13	AgeControl	13	7.81619	03_Water1	m1
13	AgeControl	14	8.12302	03_Water1	m1
13	AgeControl	15	8.47363	03_Water1	m1
13	AgeControl	16	8.69292	03_Water1	m1
13	AgeControl	17	9.05972	03_Water1	m1
13	AgeControl	18	9.50135	03_Water1	m1
13	AgeControl	19	9.89594	03_Water1	m1
13	AgeControl	20	10.4378	03_Water1	m1
13	AgeControl	21	11.0113	03_Water1	m1
13	CRemoved	1	364120	03_Water1	m1
13	CRemoved	2	388405	03_Water1	m1
13	CRemoved	3	353927	03_Water1	m1
13	CRemoved	4	371129	03_Water1	m1
13	CRemoved	5	370413	03_Water1	m1
13	CRemoved	6	354092	03_Water1	m1
13	CRemoved	7	335789	03_Water1	m1
13	CRemoved	8	312992	03_Water1	m1
13	CRemoved	9	312992	03_Water1	m1
13	CRemoved	10	312992	03_Water1	m1
13	CRemoved	11	312992	03_Water1	m1
13	CRemoved	12	312992	03_Water1	m1
13	CRemoved	13	312992	03_Water1	m1
13	CRemoved	14	312992	03_Water1	m1
13	CRemoved	15	312992	03_Water1	m1
13	CRemoved	16	312992	03_Water1	m1
13	CRemoved	17	312992	03_Water1	m1
13	CRemoved	18	312992	03_Water1	m1
13	CRemoved	19	312992	03_Water1	m1
13	CRemoved	20	312992	03_Water1	m1
13	CRemoved	21	312992	03_Water1	m1
13	DscCosts	1	5.56702e+07	03_Water1	m1
13	DscCosts	2	5.0477e+07	03_Water1	m1
13	DscCosts	3	4.24399e+07	03_Water1	m1
13	DscCosts	4	3.84653e+07	03_Water1	m1
13	DscCosts	5	3.4161e+07	03_Water1	m1
13	DscCosts	6	3.00896e+07	03_Water1	m1
13	DscCosts	7	2.4655e+07	03_Water1	m1
13	DscCosts	8	2.45088e+07	03_Water1	m1
13	DscCosts	9	2.41041e+07	03_Water1	m1
13	DscCosts	10	2.41626e+07	03_Water1	m1
13	DscCosts	11	2.02697e+07	03_Water1	m1
13	DscCosts	12	1.75259e+07	03_Water1	m1
13	DscCosts	13	1.51401e+07	03_Water1	m1
13	DscCosts	14	1.76634e+07	03_Water1	m1
13	DscCosts	15	1.75631e+07	03_Water1	m1
13	DscCosts	16	1.82022e+07	03_Water1	m1
13	DscCosts	17	1.57581e+07	03_Water1	m1
13	DscCosts	18	1.34014e+07	03_Water1	m1
13	DscCosts	19	1.17339e+07	03_Water1	m1
13	DscCosts	20	9.87391e+06	03_Water1	m1
13	DscCosts	21	8.51711e+06	03_Water1	m1
13	DscRevenue	1	8.14332e+07	03_Water1	m1
13	DscRevenue	2	7.56238e+07	03_Water1	m1
13	DscRevenue	3	6.46484e+07	03_Water1	m1
13	DscRevenue	4	5.98894e+07	03_Water1	m1
13	DscRevenue	5	5.41132e+07	03_Water1	m1
13	DscRevenue	6	4.7698e+07	03_Water1	m1
13	DscRevenue	7	4.25335e+07	03_Water1	m1
13	DscRevenue	8	3.98939e+07	03_Water1	m1
13	DscRevenue	9	3.81429e+07	03_Water1	m1
13	DscRevenue	10	3.7485e+07	03_Water1	m1
13	DscRevenue	11	3.38055e+07	03_Water1	m1
13	DscRevenue	12	3.05693e+07	03_Water1	m1
13	DscRevenue	13	2.80662e+07	03_Water1	m1
13	DscRevenue	14	2.74641e+07	03_Water1	m1
13	DscRevenue	15	2.69333e+07	03_Water1	m1
13	DscRevenue	16	2.64711e+07	03_Water1	m1
13	DscRevenue	17	2.38703e+07	03_Water1	m1
13	DscRevenue	18	2.15831e+07	03_Water1	m1
13	DscRevenue	19	1.95666e+07	03_Water1	m1
13	DscRevenue	20	1.77843e+07	03_Water1	m1
13	DscRevenue	21	1.62502e+08	03_Water1	m1
13	VolCut	1	426248	03_Water1	m1
13	VolCut	2	383623	03_Water1	m1
13	VolCut	3	345261	03_Water1	m1
13	VolCut	4	310735	03_Water1	m1
13	VolCut	5	279661	03_Water1	m1
13	VolCut	6	251695	03_Water1	m1
13	VolCut	7	236599	03_Water1	m1
13	VolCut	8	260259	03_Water1	m1
13	VolCut	9	268827	03_Water1	m1
13	VolCut	10	295710	03_Water1	m1
13	VolCut	11	266139	03_Water1	m1
13	VolCut	12	239525	03_Water1	m1
13	VolCut	13	223043	03_Water1	m1
13	VolCut	14	245347	03_Water1	m1
13	VolCut	15	269882	03_Water1	m1
13	VolCut	16	296870	03_Water1	m1
13	VolCut	17	267183	03_Water1	m1
13	VolCut	18	240465	03_Water1	m1
13	VolCut	19	216418	03_Water1	m1
13	VolCut	20	194776	03_Water1	m1
13	VolCut	21	175299	03_Water1	m1
14	AgeControl	1	4.84435	03_Water1	m2
14	AgeControl	2	4.84554	03_Water1	m2
14	AgeControl	3	4.86597	03_Water1	m2
14	AgeControl	4	5.0807	03_Water1	m2
14	AgeControl	5	5.31658	03_Water1	m2
14	AgeControl	6	5.56066	03_Water1	m2
14	AgeControl	7	6.01106	03_Water1	m2
14	AgeControl	8	6.36444	03_Water1	m2
14	AgeControl	9	6.69244	03_Water1	m2
14	AgeControl	10	6.86896	03_Water1	m2
14	AgeControl	11	7.14062	03_Water1	m2
14	AgeControl	12	7.4301	03_Water1	m2
14	AgeControl	13	7.81619	03_Water1	m2
14	AgeControl	14	8.12302	03_Water1	m2
14	AgeControl	15	8.47363	03_Water1	m2
14	AgeControl	16	8.69292	03_Water1	m2
14	AgeControl	17	9.05972	03_Water1	m2
14	AgeControl	18	9.50135	03_Water1	m2
14	AgeControl	19	9.89594	03_Water1	m2
14	AgeControl	20	10.4378	03_Water1	m2
14	AgeControl	21	11.0113	03_Water1	m2
14	CRemoved	1	364120	03_Water1	m2
14	CRemoved	2	388405	03_Water1	m2
14	CRemoved	3	353927	03_Water1	m2
14	CRemoved	4	371129	03_Water1	m2
14	CRemoved	5	370413	03_Water1	m2
14	CRemoved	6	354092	03_Water1	m2
14	CRemoved	7	335789	03_Water1	m2
14	CRemoved	8	312992	03_Water1	m2
14	CRemoved	9	312992	03_Water1	m2
14	CRemoved	10	312992	03_Water1	m2
14	CRemoved	11	312992	03_Water1	m2
14	CRemoved	12	312992	03_Water1	m2
14	CRemoved	13	312992	03_Water1	m2
14	CRemoved	14	312992	03_Water1	m2
14	CRemoved	15	312992	03_Water1	m2
14	CRemoved	16	312992	03_Water1	m2
14	CRemoved	17	312992	03_Water1	m2
14	CRemoved	18	312992	03_Water1	m2
14	CRemoved	19	312992	03_Water1	m2
14	CRemoved	20	312992	03_Water1	m2
14	CRemoved	21	312992	03_Water1	m2
14	DscCosts	1	5.56702e+07	03_Water1	m2
14	DscCosts	2	5.0477e+07	03_Water1	m2
14	DscCosts	3	4.24399e+07	03_Water1	m2
14	DscCosts	4	3.84653e+07	03_Water1	m2
14	DscCosts	5	3.4161e+07	03_Water1	m2
14	DscCosts	6	3.00896e+07	03_Water1	m2
14	DscCosts	7	2.4655e+07	03_Water1	m2
14	DscCosts	8	2.45088e+07	03_Water1	m2
14	DscCosts	9	2.41041e+07	03_Water1	m2
14	DscCosts	10	2.41626e+07	03_Water1	m2
14	DscCosts	11	2.02697e+07	03_Water1	m2
14	DscCosts	12	1.75259e+07	03_Water1	m2
14	DscCosts	13	1.51401e+07	03_Water1	m2
14	DscCosts	14	1.76634e+07	03_Water1	m2
14	DscCosts	15	1.75631e+07	03_Water1	m2
14	DscCosts	16	1.82022e+07	03_Water1	m2
14	DscCosts	17	1.57581e+07	03_Water1	m2
14	DscCosts	18	1.34014e+07	03_Water1	m2
14	DscCosts	19	1.17339e+07	03_Water1	m2
14	DscCosts	20	9.87391e+06	03_Water1	m2
14	DscCosts	21	8.51711e+06	03_Water1	m2
14	DscRevenue	1	8.14332e+07	03_Water1	m2
14	DscRevenue	2	7.56238e+07	03_Water1	m2
14	DscRevenue	3	6.46484e+07	03_Water1	m2
14	DscRevenue	4	5.98894e+07	03_Water1	m2
14	DscRevenue	5	5.41132e+07	03_Water1	m2
14	DscRevenue	6	4.7698e+07	03_Water1	m2
14	DscRevenue	7	4.25335e+07	03_Water1	m2
14	DscRevenue	8	3.98939e+07	03_Water1	m2
14	DscRevenue	9	3.81429e+07	03_Water1	m2
14	DscRevenue	10	3.7485e+07	03_Water1	m2
14	DscRevenue	11	3.38055e+07	03_Water1	m2
14	DscRevenue	12	3.05693e+07	03_Water1	m2
14	DscRevenue	13	2.80662e+07	03_Water1	m2
14	DscRevenue	14	2.74641e+07	03_Water1	m2
14	DscRevenue	15	2.69333e+07	03_Water1	m2
14	DscRevenue	16	2.64711e+07	03_Water1	m2
14	DscRevenue	17	2.38703e+07	03_Water1	m2
14	DscRevenue	18	2.15831e+07	03_Water1	m2
14	DscRevenue	19	1.95666e+07	03_Water1	m2
14	DscRevenue	20	1.77843e+07	03_Water1	m2
14	DscRevenue	21	1.62502e+08	03_Water1	m2
14	VolCut	1	426248	03_Water1	m2
14	VolCut	2	383623	03_Water1	m2
14	VolCut	3	345261	03_Water1	m2
14	VolCut	4	310735	03_Water1	m2
14	VolCut	5	279661	03_Water1	m2
14	VolCut	6	251695	03_Water1	m2
14	VolCut	7	236599	03_Water1	m2
14	VolCut	8	260259	03_Water1	m2
14	VolCut	9	268827	03_Water1	m2
14	VolCut	10	295710	03_Water1	m2
14	VolCut	11	266139	03_Water1	m2
14	VolCut	12	239525	03_Water1	m2
14	VolCut	13	223043	03_Water1	m2
14	VolCut	14	245347	03_Water1	m2
14	VolCut	15	269882	03_Water1	m2
14	VolCut	16	296870	03_Water1	m2
14	VolCut	17	267183	03_Water1	m2
14	VolCut	18	240465	03_Water1	m2
14	VolCut	19	216418	03_Water1	m2
14	VolCut	20	194776	03_Water1	m2
14	VolCut	21	175299	03_Water1	m2
15	AgeControl	1	4.84435	03_Water1	m3
15	AgeControl	2	4.84554	03_Water1	m3
15	AgeControl	3	4.86597	03_Water1	m3
15	AgeControl	4	5.0807	03_Water1	m3
15	AgeControl	5	5.31658	03_Water1	m3
15	AgeControl	6	5.56066	03_Water1	m3
15	AgeControl	7	6.01106	03_Water1	m3
15	AgeControl	8	6.36444	03_Water1	m3
15	AgeControl	9	6.69244	03_Water1	m3
15	AgeControl	10	6.86896	03_Water1	m3
15	AgeControl	11	7.14062	03_Water1	m3
15	AgeControl	12	7.4301	03_Water1	m3
15	AgeControl	13	7.81619	03_Water1	m3
15	AgeControl	14	8.12302	03_Water1	m3
15	AgeControl	15	8.47363	03_Water1	m3
15	AgeControl	16	8.69292	03_Water1	m3
15	AgeControl	17	9.05972	03_Water1	m3
15	AgeControl	18	9.50135	03_Water1	m3
15	AgeControl	19	9.89594	03_Water1	m3
15	AgeControl	20	10.4378	03_Water1	m3
15	AgeControl	21	11.0113	03_Water1	m3
15	CRemoved	1	364120	03_Water1	m3
15	CRemoved	2	388405	03_Water1	m3
15	CRemoved	3	353927	03_Water1	m3
15	CRemoved	4	371129	03_Water1	m3
15	CRemoved	5	370413	03_Water1	m3
15	CRemoved	6	354092	03_Water1	m3
15	CRemoved	7	335789	03_Water1	m3
15	CRemoved	8	312992	03_Water1	m3
15	CRemoved	9	312992	03_Water1	m3
15	CRemoved	10	312992	03_Water1	m3
15	CRemoved	11	312992	03_Water1	m3
15	CRemoved	12	312992	03_Water1	m3
15	CRemoved	13	312992	03_Water1	m3
15	CRemoved	14	312992	03_Water1	m3
15	CRemoved	15	312992	03_Water1	m3
15	CRemoved	16	312992	03_Water1	m3
15	CRemoved	17	312992	03_Water1	m3
15	CRemoved	18	312992	03_Water1	m3
15	CRemoved	19	312992	03_Water1	m3
15	CRemoved	20	312992	03_Water1	m3
15	CRemoved	21	312992	03_Water1	m3
15	DscCosts	1	5.56702e+07	03_Water1	m3
15	DscCosts	2	5.0477e+07	03_Water1	m3
15	DscCosts	3	4.24399e+07	03_Water1	m3
15	DscCosts	4	3.84653e+07	03_Water1	m3
15	DscCosts	5	3.4161e+07	03_Water1	m3
15	DscCosts	6	3.00896e+07	03_Water1	m3
15	DscCosts	7	2.4655e+07	03_Water1	m3
15	DscCosts	8	2.45088e+07	03_Water1	m3
15	DscCosts	9	2.41041e+07	03_Water1	m3
15	DscCosts	10	2.41626e+07	03_Water1	m3
15	DscCosts	11	2.02697e+07	03_Water1	m3
15	DscCosts	12	1.75259e+07	03_Water1	m3
15	DscCosts	13	1.51401e+07	03_Water1	m3
15	DscCosts	14	1.76634e+07	03_Water1	m3
15	DscCosts	15	1.75631e+07	03_Water1	m3
15	DscCosts	16	1.82022e+07	03_Water1	m3
15	DscCosts	17	1.57581e+07	03_Water1	m3
15	DscCosts	18	1.34014e+07	03_Water1	m3
15	DscCosts	19	1.17339e+07	03_Water1	m3
15	DscCosts	20	9.87391e+06	03_Water1	m3
15	DscCosts	21	8.51711e+06	03_Water1	m3
15	DscRevenue	1	8.14332e+07	03_Water1	m3
15	DscRevenue	2	7.56238e+07	03_Water1	m3
15	DscRevenue	3	6.46484e+07	03_Water1	m3
15	DscRevenue	4	5.98894e+07	03_Water1	m3
15	DscRevenue	5	5.41132e+07	03_Water1	m3
15	DscRevenue	6	4.7698e+07	03_Water1	m3
15	DscRevenue	7	4.25335e+07	03_Water1	m3
15	DscRevenue	8	3.98939e+07	03_Water1	m3
15	DscRevenue	9	3.81429e+07	03_Water1	m3
15	DscRevenue	10	3.7485e+07	03_Water1	m3
15	DscRevenue	11	3.38055e+07	03_Water1	m3
15	DscRevenue	12	3.05693e+07	03_Water1	m3
15	DscRevenue	13	2.80662e+07	03_Water1	m3
15	DscRevenue	14	2.74641e+07	03_Water1	m3
15	DscRevenue	15	2.69333e+07	03_Water1	m3
15	DscRevenue	16	2.64711e+07	03_Water1	m3
15	DscRevenue	17	2.38703e+07	03_Water1	m3
15	DscRevenue	18	2.15831e+07	03_Water1	m3
15	DscRevenue	19	1.95666e+07	03_Water1	m3
15	DscRevenue	20	1.77843e+07	03_Water1	m3
15	DscRevenue	21	1.62502e+08	03_Water1	m3
15	VolCut	1	426248	03_Water1	m3
15	VolCut	2	383623	03_Water1	m3
15	VolCut	3	345261	03_Water1	m3
15	VolCut	4	310735	03_Water1	m3
15	VolCut	5	279661	03_Water1	m3
15	VolCut	6	251695	03_Water1	m3
15	VolCut	7	236599	03_Water1	m3
15	VolCut	8	260259	03_Water1	m3
15	VolCut	9	268827	03_Water1	m3
15	VolCut	10	295710	03_Water1	m3
15	VolCut	11	266139	03_Water1	m3
15	VolCut	12	239525	03_Water1	m3
15	VolCut	13	223043	03_Water1	m3
15	VolCut	14	245347	03_Water1	m3
15	VolCut	15	269882	03_Water1	m3
15	VolCut	16	296870	03_Water1	m3
15	VolCut	17	267183	03_Water1	m3
15	VolCut	18	240465	03_Water1	m3
15	VolCut	19	216418	03_Water1	m3
15	VolCut	20	194776	03_Water1	m3
15	VolCut	21	175299	03_Water1	m3
16	CRemoved	1	364120	03_Water2	m1
16	CRemoved	2	385700	03_Water2	m1
16	CRemoved	3	349473	03_Water2	m1
16	CRemoved	4	364576	03_Water2	m1
16	CRemoved	5	360584	03_Water2	m1
16	CRemoved	6	339369	03_Water2	m1
16	CRemoved	7	322037	03_Water2	m1
16	CRemoved	8	298310	03_Water2	m1
16	CRemoved	9	298310	03_Water2	m1
16	CRemoved	10	298310	03_Water2	m1
16	CRemoved	11	298310	03_Water2	m1
16	CRemoved	12	298310	03_Water2	m1
16	CRemoved	13	298310	03_Water2	m1
16	CRemoved	14	298310	03_Water2	m1
16	CRemoved	15	298310	03_Water2	m1
16	CRemoved	16	298310	03_Water2	m1
16	CRemoved	17	298310	03_Water2	m1
16	CRemoved	18	298310	03_Water2	m1
16	CRemoved	19	298310	03_Water2	m1
16	CRemoved	20	298310	03_Water2	m1
16	CRemoved	21	298310	03_Water2	m1
16	DscCosts	1	5.31102e+07	03_Water2	m1
16	DscCosts	2	4.80699e+07	03_Water2	m1
16	DscCosts	3	4.0331e+07	03_Water2	m1
16	DscCosts	4	3.65451e+07	03_Water2	m1
16	DscCosts	5	3.24318e+07	03_Water2	m1
16	DscCosts	6	2.88514e+07	03_Water2	m1
16	DscCosts	7	2.39676e+07	03_Water2	m1
16	DscCosts	8	2.27598e+07	03_Water2	m1
16	DscCosts	9	2.14176e+07	03_Water2	m1
16	DscCosts	10	2.11615e+07	03_Water2	m1
16	DscCosts	11	1.94106e+07	03_Water2	m1
16	DscCosts	12	1.63467e+07	03_Water2	m1
16	DscCosts	13	1.41674e+07	03_Water2	m1
16	DscCosts	14	1.73278e+07	03_Water2	m1
16	DscCosts	15	1.704e+07	03_Water2	m1
16	DscCosts	16	1.78654e+07	03_Water2	m1
16	DscCosts	17	1.53152e+07	03_Water2	m1
16	DscCosts	18	1.32229e+07	03_Water2	m1
16	DscCosts	19	1.13856e+07	03_Water2	m1
16	DscCosts	20	9.49458e+06	03_Water2	m1
16	DscCosts	21	8.48192e+06	03_Water2	m1
16	DscRevenue	1	7.92285e+07	03_Water2	m1
16	DscRevenue	2	7.3463e+07	03_Water2	m1
16	DscRevenue	3	6.26103e+07	03_Water2	m1
16	DscRevenue	4	5.7917e+07	03_Water2	m1
16	DscRevenue	5	5.20861e+07	03_Water2	m1
16	DscRevenue	6	4.54797e+07	03_Water2	m1
16	DscRevenue	7	4.0906e+07	03_Water2	m1
16	DscRevenue	8	3.76648e+07	03_Water2	m1
16	DscRevenue	9	3.5295e+07	03_Water2	m1
16	DscRevenue	10	3.4628e+07	03_Water2	m1
16	DscRevenue	11	3.21372e+07	03_Water2	m1
16	DscRevenue	12	2.90653e+07	03_Water2	m1
16	DscRevenue	13	2.69036e+07	03_Water2	m1
16	DscRevenue	14	2.63355e+07	03_Water2	m1
16	DscRevenue	15	2.58356e+07	03_Water2	m1
16	DscRevenue	16	2.54014e+07	03_Water2	m1
16	DscRevenue	17	2.28966e+07	03_Water2	m1
16	DscRevenue	18	2.06946e+07	03_Water2	m1
16	DscRevenue	19	1.87541e+07	03_Water2	m1
16	DscRevenue	20	1.70394e+07	03_Water2	m1
16	DscRevenue	21	1.62123e+08	03_Water2	m1
16	PltCover	(01, 21)	74.72	03_Water2	m1
16	PltCover	(01, 313)	2133.98	03_Water2	m1
16	PltCover	(01, 314)	635.73	03_Water2	m1
16	PltCover	(01, 315)	1160.18	03_Water2	m1
16	PltCover	(01, 316)	564.75	03_Water2	m1
16	PltCover	(01, 317)	143.95	03_Water2	m1
16	PltCover	(01, 7)	1582.85	03_Water2	m1
16	PltCover	(01, 8)	3086.76	03_Water2	m1
16	PltCover	(01, 9)	324.8	03_Water2	m1
16	PltCover	(02, 21)	74.72	03_Water2	m1
16	PltCover	(02, 313)	2265.41	03_Water2	m1
16	PltCover	(02, 314)	635.73	03_Water2	m1
16	PltCover	(02, 315)	987.61	03_Water2	m1
16	PltCover	(02, 316)	410.315	03_Water2	m1
16	PltCover	(02, 317)	117.8	03_Water2	m1
16	PltCover	(02, 7)	1123.46	03_Water2	m1
16	PltCover	(02, 8)	3411.46	03_Water2	m1
16	PltCover	(02, 9)	324.8	03_Water2	m1
16	PltCover	(03, 21)	74.72	03_Water2	m1
16	PltCover	(03, 313)	2063.35	03_Water2	m1
16	PltCover	(03, 314)	635.73	03_Water2	m1
16	PltCover	(03, 315)	899.58	03_Water2	m1
16	PltCover	(03, 316)	272.57	03_Water2	m1
16	PltCover	(03, 317)	91.61	03_Water2	m1
16	PltCover	(03, 7)	962.935	03_Water2	m1
16	PltCover	(03, 8)	3035.02	03_Water2	m1
16	PltCover	(03, 9)	154.94	03_Water2	m1
16	PltCover	(04, 21)	193.78	03_Water2	m1
16	PltCover	(04, 313)	2063.35	03_Water2	m1
16	PltCover	(04, 314)	231.665	03_Water2	m1
16	PltCover	(04, 315)	899.58	03_Water2	m1
16	PltCover	(04, 316)	272.57	03_Water2	m1
16	PltCover	(04, 317)	91.61	03_Water2	m1
16	PltCover	(04, 7)	1961.37	03_Water2	m1
16	PltCover	(04, 8)	2864.67	03_Water2	m1
16	PltCover	(04, 9)	154.94	03_Water2	m1
16	PltCover	(05, 21)	193.78	03_Water2	m1
16	PltCover	(05, 313)	2087.04	03_Water2	m1
16	PltCover	(05, 314)	231.665	03_Water2	m1
16	PltCover	(05, 315)	1072.15	03_Water2	m1
16	PltCover	(05, 316)	427.005	03_Water2	m1
16	PltCover	(05, 317)	117.76	03_Water2	m1
16	PltCover	(05, 7)	2420.77	03_Water2	m1
16	PltCover	(05, 8)	2189.03	03_Water2	m1
16	PltCover	(05, 9)	154.94	03_Water2	m1
16	PltCover	(06, 21)	193.78	03_Water2	m1
16	PltCover	(06, 313)	1797.13	03_Water2	m1
16	PltCover	(06, 314)	231.665	03_Water2	m1
16	PltCover	(06, 315)	1160.18	03_Water2	m1
16	PltCover	(06, 316)	564.75	03_Water2	m1
16	PltCover	(06, 317)	143.95	03_Water2	m1
16	PltCover	(06, 7)	2581.29	03_Water2	m1
16	PltCover	(06, 8)	1857.86	03_Water2	m1
16	PltCover	(06, 9)	324.8	03_Water2	m1
16	PltCover	(07, 21)	152.49	03_Water2	m1
16	PltCover	(07, 313)	1797.13	03_Water2	m1
16	PltCover	(07, 314)	635.73	03_Water2	m1
16	PltCover	(07, 315)	1160.18	03_Water2	m1
16	PltCover	(07, 316)	564.75	03_Water2	m1
16	PltCover	(07, 317)	143.95	03_Water2	m1
16	PltCover	(07, 7)	1801.88	03_Water2	m1
16	PltCover	(07, 8)	2459.99	03_Water2	m1
16	PltCover	(07, 9)	324.8	03_Water2	m1
16	PltCover	(08, 21)	74.72	03_Water2	m1
16	PltCover	(08, 313)	1850.1	03_Water2	m1
16	PltCover	(08, 314)	635.73	03_Water2	m1
16	PltCover	(08, 315)	1022.66	03_Water2	m1
16	PltCover	(08, 316)	410.315	03_Water2	m1
16	PltCover	(08, 317)	117.8	03_Water2	m1
16	PltCover	(08, 7)	1521.75	03_Water2	m1
16	PltCover	(08, 8)	3196.16	03_Water2	m1
16	PltCover	(08, 9)	324.8	03_Water2	m1
16	PltCover	(09, 21)	74.72	03_Water2	m1
16	PltCover	(09, 313)	2265.41	03_Water2	m1
16	PltCover	(09, 314)	635.73	03_Water2	m1
16	PltCover	(09, 315)	987.61	03_Water2	m1
16	PltCover	(09, 316)	406.069	03_Water2	m1
16	PltCover	(09, 317)	117.8	03_Water2	m1
16	PltCover	(09, 7)	1123.46	03_Water2	m1
16	PltCover	(09, 8)	3369.25	03_Water2	m1
16	PltCover	(09, 9)	266.816	03_Water2	m1
16	PltCover	(10, 21)	116.01	03_Water2	m1
16	PltCover	(10, 313)	2124.39	03_Water2	m1
16	PltCover	(10, 314)	528.985	03_Water2	m1
16	PltCover	(10, 315)	899.58	03_Water2	m1
16	PltCover	(10, 316)	272.57	03_Water2	m1
16	PltCover	(10, 317)	91.61	03_Water2	m1
16	PltCover	(10, 7)	1902.87	03_Water2	m1
16	PltCover	(10, 8)	2723	03_Water2	m1
16	PltCover	(10, 9)	266.816	03_Water2	m1
16	PltCover	(11, 21)	193.78	03_Water2	m1
16	PltCover	(11, 313)	2475.94	03_Water2	m1
16	PltCover	(11, 314)	231.665	03_Water2	m1
16	PltCover	(11, 315)	1037.1	03_Water2	m1
16	PltCover	(11, 316)	427.005	03_Water2	m1
16	PltCover	(11, 317)	117.76	03_Water2	m1
16	PltCover	(11, 7)	2022.48	03_Water2	m1
16	PltCover	(11, 8)	2245.43	03_Water2	m1
16	PltCover	(11, 9)	154.94	03_Water2	m1
16	PltCover	(12, 21)	193.78	03_Water2	m1
16	PltCover	(12, 313)	1819.75	03_Water2	m1
16	PltCover	(12, 314)	231.665	03_Water2	m1
16	PltCover	(12, 315)	1072.15	03_Water2	m1
16	PltCover	(12, 316)	431.251	03_Water2	m1
16	PltCover	(12, 317)	117.76	03_Water2	m1
16	PltCover	(12, 7)	2420.77	03_Water2	m1
16	PltCover	(12, 8)	2229.4	03_Water2	m1
16	PltCover	(12, 9)	212.924	03_Water2	m1
16	PltCover	(13, 21)	152.49	03_Water2	m1
16	PltCover	(13, 313)	1838.58	03_Water2	m1
16	PltCover	(13, 314)	338.41	03_Water2	m1
16	PltCover	(13, 315)	1160.18	03_Water2	m1
16	PltCover	(13, 316)	564.75	03_Water2	m1
16	PltCover	(13, 317)	143.95	03_Water2	m1
16	PltCover	(13, 7)	1753.24	03_Water2	m1
16	PltCover	(13, 8)	2785.42	03_Water2	m1
16	PltCover	(13, 9)	212.924	03_Water2	m1
16	PltCover	(14, 21)	152.49	03_Water2	m1
16	PltCover	(14, 313)	1418.45	03_Water2	m1
16	PltCover	(14, 314)	635.73	03_Water2	m1
16	PltCover	(14, 315)	1056.8	03_Water2	m1
16	PltCover	(14, 316)	513.92	03_Water2	m1
16	PltCover	(14, 317)	143.95	03_Water2	m1
16	PltCover	(14, 7)	1913.77	03_Water2	m1
16	PltCover	(14, 8)	2846.6	03_Water2	m1
16	PltCover	(14, 9)	324.8	03_Water2	m1
16	PltCover	(15, 21)	74.72	03_Water2	m1
16	PltCover	(15, 313)	2151.31	03_Water2	m1
16	PltCover	(15, 314)	635.73	03_Water2	m1
16	PltCover	(15, 315)	1056.8	03_Water2	m1
16	PltCover	(15, 316)	410.315	03_Water2	m1
16	PltCover	(15, 317)	143.95	03_Water2	m1
16	PltCover	(15, 7)	1382.21	03_Water2	m1
16	PltCover	(15, 8)	2919.11	03_Water2	m1
16	PltCover	(15, 9)	324.8	03_Water2	m1
16	PltCover	(16, 21)	116.01	03_Water2	m1
16	PltCover	(16, 313)	2162.92	03_Water2	m1
16	PltCover	(16, 314)	528.985	03_Water2	m1
16	PltCover	(16, 315)	987.61	03_Water2	m1
16	PltCover	(16, 316)	410.315	03_Water2	m1
16	PltCover	(16, 317)	117.8	03_Water2	m1
16	PltCover	(16, 7)	1790.98	03_Water2	m1
16	PltCover	(16, 8)	2537.13	03_Water2	m1
16	PltCover	(16, 9)	266.816	03_Water2	m1
16	PltCover	(17, 21)	116.01	03_Water2	m1
16	PltCover	(17, 313)	2503.07	03_Water2	m1
16	PltCover	(17, 314)	528.985	03_Water2	m1
16	PltCover	(17, 315)	1002.96	03_Water2	m1
16	PltCover	(17, 316)	323.4	03_Water2	m1
16	PltCover	(17, 317)	91.61	03_Water2	m1
16	PltCover	(17, 7)	1630.46	03_Water2	m1
16	PltCover	(17, 8)	2591.96	03_Water2	m1
16	PltCover	(17, 9)	185.22	03_Water2	m1
16	PltCover	(18, 21)	193.78	03_Water2	m1
16	PltCover	(18, 313)	2091.15	03_Water2	m1
16	PltCover	(18, 314)	231.665	03_Water2	m1
16	PltCover	(18, 315)	1002.96	03_Water2	m1
16	PltCover	(18, 316)	427.005	03_Water2	m1
16	PltCover	(18, 317)	91.61	03_Water2	m1
16	PltCover	(18, 7)	2162.01	03_Water2	m1
16	PltCover	(18, 8)	2746.05	03_Water2	m1
16	PltCover	(18, 9)	154.94	03_Water2	m1
16	PltCover	(19, 21)	193.78	03_Water2	m1
16	PltCover	(19, 313)	1998.5	03_Water2	m1
16	PltCover	(19, 314)	338.41	03_Water2	m1
16	PltCover	(19, 315)	1072.15	03_Water2	m1
16	PltCover	(19, 316)	427.005	03_Water2	m1
16	PltCover	(19, 317)	117.76	03_Water2	m1
16	PltCover	(19, 7)	2376.05	03_Water2	m1
16	PltCover	(19, 8)	2783.77	03_Water2	m1
16	PltCover	(19, 9)	212.924	03_Water2	m1
16	PltCover	(20, 21)	152.49	03_Water2	m1
16	PltCover	(20, 313)	2139.52	03_Water2	m1
16	PltCover	(20, 314)	338.41	03_Water2	m1
16	PltCover	(20, 315)	1160.18	03_Water2	m1
16	PltCover	(20, 316)	564.75	03_Water2	m1
16	PltCover	(20, 317)	143.95	03_Water2	m1
16	PltCover	(20, 7)	1976.64	03_Water2	m1
16	PltCover	(20, 8)	3080.28	03_Water2	m1
16	PltCover	(20, 9)	294.52	03_Water2	m1
16	PltCover	(21, 21)	152.49	03_Water2	m1
16	PltCover	(21, 313)	2172.75	03_Water2	m1
16	PltCover	(21, 314)	635.73	03_Water2	m1
16	PltCover	(21, 315)	1056.8	03_Water2	m1
16	PltCover	(21, 316)	513.92	03_Water2	m1
16	PltCover	(21, 317)	143.95	03_Water2	m1
16	PltCover	(21, 7)	1913.77	03_Water2	m1
16	PltCover	(21, 8)	3267.12	03_Water2	m1
16	PltCover	(21, 9)	324.8	03_Water2	m1
16	VolCut	1	402878	03_Water2	m1
16	VolCut	2	362590	03_Water2	m1
16	VolCut	3	326331	03_Water2	m1
16	VolCut	4	293698	03_Water2	m1
16	VolCut	5	264328	03_Water2	m1
16	VolCut	6	237895	03_Water2	m1
16	VolCut	7	228631	03_Water2	m1
16	VolCut	8	242347	03_Water2	m1
16	VolCut	9	238330	03_Water2	m1
16	VolCut	10	262163	03_Water2	m1
16	VolCut	11	252087	03_Water2	m1
16	VolCut	12	226879	03_Water2	m1
16	VolCut	13	215862	03_Water2	m1
16	VolCut	14	237449	03_Water2	m1
16	VolCut	15	261194	03_Water2	m1
16	VolCut	16	287313	03_Water2	m1
16	VolCut	17	258582	03_Water2	m1
16	VolCut	18	232723	03_Water2	m1
16	VolCut	19	209451	03_Water2	m1
16	VolCut	20	188506	03_Water2	m1
16	VolCut	21	169655	03_Water2	m1
17	CRemoved	1	364120	03_Water2	m2
17	CRemoved	2	385700	03_Water2	m2
17	CRemoved	3	349473	03_Water2	m2
17	CRemoved	4	364576	03_Water2	m2
17	CRemoved	5	360584	03_Water2	m2
17	CRemoved	6	339369	03_Water2	m2
17	CRemoved	7	322037	03_Water2	m2
17	CRemoved	8	298310	03_Water2	m2
17	CRemoved	9	298310	03_Water2	m2
17	CRemoved	10	298310	03_Water2	m2
17	CRemoved	11	298310	03_Water2	m2
17	CRemoved	12	298310	03_Water2	m2
17	CRemoved	13	298310	03_Water2	m2
17	CRemoved	14	298310	03_Water2	m2
17	CRemoved	15	298310	03_Water2	m2
17	CRemoved	16	298310	03_Water2	m2
17	CRemoved	17	298310	03_Water2	m2
17	CRemoved	18	298310	03_Water2	m2
17	CRemoved	19	298310	03_Water2	m2
17	CRemoved	20	298310	03_Water2	m2
17	CRemoved	21	298310	03_Water2	m2
17	DscCosts	1	5.31102e+07	03_Water2	m2
17	DscCosts	2	4.80699e+07	03_Water2	m2
17	DscCosts	3	4.0331e+07	03_Water2	m2
17	DscCosts	4	3.65451e+07	03_Water2	m2
17	DscCosts	5	3.24318e+07	03_Water2	m2
17	DscCosts	6	2.88514e+07	03_Water2	m2
17	DscCosts	7	2.39676e+07	03_Water2	m2
17	DscCosts	8	2.27598e+07	03_Water2	m2
17	DscCosts	9	2.14176e+07	03_Water2	m2
17	DscCosts	10	2.11615e+07	03_Water2	m2
17	DscCosts	11	1.94106e+07	03_Water2	m2
17	DscCosts	12	1.63467e+07	03_Water2	m2
17	DscCosts	13	1.41674e+07	03_Water2	m2
17	DscCosts	14	1.73278e+07	03_Water2	m2
17	DscCosts	15	1.704e+07	03_Water2	m2
17	DscCosts	16	1.78654e+07	03_Water2	m2
17	DscCosts	17	1.53152e+07	03_Water2	m2
17	DscCosts	18	1.32229e+07	03_Water2	m2
17	DscCosts	19	1.13856e+07	03_Water2	m2
17	DscCosts	20	9.49458e+06	03_Water2	m2
17	DscCosts	21	8.48192e+06	03_Water2	m2
17	DscRevenue	1	7.92285e+07	03_Water2	m2
17	DscRevenue	2	7.3463e+07	03_Water2	m2
17	DscRevenue	3	6.26103e+07	03_Water2	m2
17	DscRevenue	4	5.7917e+07	03_Water2	m2
17	DscRevenue	5	5.20861e+07	03_Water2	m2
17	DscRevenue	6	4.54797e+07	03_Water2	m2
17	DscRevenue	7	4.0906e+07	03_Water2	m2
17	DscRevenue	8	3.76648e+07	03_Water2	m2
17	DscRevenue	9	3.5295e+07	03_Water2	m2
17	DscRevenue	10	3.4628e+07	03_Water2	m2
17	DscRevenue	11	3.21372e+07	03_Water2	m2
17	DscRevenue	12	2.90653e+07	03_Water2	m2
17	DscRevenue	13	2.69036e+07	03_Water2	m2
17	DscRevenue	14	2.63355e+07	03_Water2	m2
17	DscRevenue	15	2.58356e+07	03_Water2	m2
17	DscRevenue	16	2.54014e+07	03_Water2	m2
17	DscRevenue	17	2.28966e+07	03_Water2	m2
17	DscRevenue	18	2.06946e+07	03_Water2	m2
17	DscRevenue	19	1.87541e+07	03_Water2	m2
17	DscRevenue	20	1.70394e+07	03_Water2	m2
17	DscRevenue	21	1.62123e+08	03_Water2	m2
17	PltCover	(01, 21)	74.72	03_Water2	m2
17	PltCover	(01, 313)	2133.98	03_Water2	m2
17	PltCover	(01, 314)	635.73	03_Water2	m2
17	PltCover	(01, 315)	1160.18	03_Water2	m2
17	PltCover	(01, 316)	564.75	03_Water2	m2
17	PltCover	(01, 317)	143.95	03_Water2	m2
17	PltCover	(01, 7)	1582.85	03_Water2	m2
17	PltCover	(01, 8)	3086.76	03_Water2	m2
17	PltCover	(01, 9)	324.8	03_Water2	m2
17	PltCover	(02, 21)	74.72	03_Water2	m2
17	PltCover	(02, 313)	2343.07	03_Water2	m2
17	PltCover	(02, 314)	635.73	03_Water2	m2
17	PltCover	(02, 315)	901.434	03_Water2	m2
17	PltCover	(02, 316)	410.315	03_Water2	m2
17	PltCover	(02, 317)	126.318	03_Water2	m2
17	PltCover	(02, 7)	1123.46	03_Water2	m2
17	PltCover	(02, 8)	3415.12	03_Water2	m2
17	PltCover	(02, 9)	321.144	03_Water2	m2
17	PltCover	(03, 21)	74.72	03_Water2	m2
17	PltCover	(03, 313)	2153.94	03_Water2	m2
17	PltCover	(03, 314)	635.73	03_Water2	m2
17	PltCover	(03, 315)	800.47	03_Water2	m2
17	PltCover	(03, 316)	272.57	03_Water2	m2
17	PltCover	(03, 317)	100.128	03_Water2	m2
17	PltCover	(03, 7)	962.935	03_Water2	m2
17	PltCover	(03, 8)	3035.02	03_Water2	m2
17	PltCover	(03, 9)	154.94	03_Water2	m2
17	PltCover	(04, 21)	193.78	03_Water2	m2
17	PltCover	(04, 313)	2153.94	03_Water2	m2
17	PltCover	(04, 314)	231.665	03_Water2	m2
17	PltCover	(04, 315)	800.47	03_Water2	m2
17	PltCover	(04, 316)	272.57	03_Water2	m2
17	PltCover	(04, 317)	100.128	03_Water2	m2
17	PltCover	(04, 7)	1961.37	03_Water2	m2
17	PltCover	(04, 8)	2864.67	03_Water2	m2
17	PltCover	(04, 9)	154.94	03_Water2	m2
17	PltCover	(05, 21)	193.78	03_Water2	m2
17	PltCover	(05, 313)	2099.98	03_Water2	m2
17	PltCover	(05, 314)	231.665	03_Water2	m2
17	PltCover	(05, 315)	1059.22	03_Water2	m2
17	PltCover	(05, 316)	427.005	03_Water2	m2
17	PltCover	(05, 317)	117.76	03_Water2	m2
17	PltCover	(05, 7)	2420.77	03_Water2	m2
17	PltCover	(05, 8)	2185.37	03_Water2	m2
17	PltCover	(05, 9)	158.596	03_Water2	m2
17	PltCover	(06, 21)	193.78	03_Water2	m2
17	PltCover	(06, 313)	1797.13	03_Water2	m2
17	PltCover	(06, 314)	231.665	03_Water2	m2
17	PltCover	(06, 315)	1160.18	03_Water2	m2
17	PltCover	(06, 316)	564.75	03_Water2	m2
17	PltCover	(06, 317)	143.95	03_Water2	m2
17	PltCover	(06, 7)	2581.29	03_Water2	m2
17	PltCover	(06, 8)	1857.86	03_Water2	m2
17	PltCover	(06, 9)	324.8	03_Water2	m2
17	PltCover	(07, 21)	111.301	03_Water2	m2
17	PltCover	(07, 313)	1797.13	03_Water2	m2
17	PltCover	(07, 314)	635.73	03_Water2	m2
17	PltCover	(07, 315)	1160.18	03_Water2	m2
17	PltCover	(07, 316)	564.75	03_Water2	m2
17	PltCover	(07, 317)	143.95	03_Water2	m2
17	PltCover	(07, 7)	1912.58	03_Water2	m2
17	PltCover	(07, 8)	2390.48	03_Water2	m2
17	PltCover	(07, 9)	324.8	03_Water2	m2
17	PltCover	(08, 21)	74.72	03_Water2	m2
17	PltCover	(08, 313)	1851.09	03_Water2	m2
17	PltCover	(08, 314)	635.73	03_Water2	m2
17	PltCover	(08, 315)	1013.15	03_Water2	m2
17	PltCover	(08, 316)	410.315	03_Water2	m2
17	PltCover	(08, 317)	126.318	03_Water2	m2
17	PltCover	(08, 7)	1521.75	03_Water2	m2
17	PltCover	(08, 8)	3196.16	03_Water2	m2
17	PltCover	(08, 9)	324.8	03_Water2	m2
17	PltCover	(09, 21)	74.72	03_Water2	m2
17	PltCover	(09, 313)	2343.07	03_Water2	m2
17	PltCover	(09, 314)	635.73	03_Water2	m2
17	PltCover	(09, 315)	901.434	03_Water2	m2
17	PltCover	(09, 316)	406.069	03_Water2	m2
17	PltCover	(09, 317)	126.318	03_Water2	m2
17	PltCover	(09, 7)	1123.46	03_Water2	m2
17	PltCover	(09, 8)	3473.49	03_Water2	m2
17	PltCover	(09, 9)	162.57	03_Water2	m2
17	PltCover	(10, 21)	157.199	03_Water2	m2
17	PltCover	(10, 313)	2202.05	03_Water2	m2
17	PltCover	(10, 314)	528.985	03_Water2	m2
17	PltCover	(10, 315)	813.404	03_Water2	m2
17	PltCover	(10, 316)	272.57	03_Water2	m2
17	PltCover	(10, 317)	100.128	03_Water2	m2
17	PltCover	(10, 7)	1792.17	03_Water2	m2
17	PltCover	(10, 8)	2896.75	03_Water2	m2
17	PltCover	(10, 9)	162.57	03_Water2	m2
17	PltCover	(11, 21)	193.78	03_Water2	m2
17	PltCover	(11, 313)	2565.54	03_Water2	m2
17	PltCover	(11, 314)	231.665	03_Water2	m2
17	PltCover	(11, 315)	947.5	03_Water2	m2
17	PltCover	(11, 316)	427.005	03_Water2	m2
17	PltCover	(11, 317)	117.76	03_Water2	m2
17	PltCover	(11, 7)	2022.48	03_Water2	m2
17	PltCover	(11, 8)	2245.43	03_Water2	m2
17	PltCover	(11, 9)	154.94	03_Water2	m2
17	PltCover	(12, 21)	193.78	03_Water2	m2
17	PltCover	(12, 313)	1832.68	03_Water2	m2
17	PltCover	(12, 314)	231.665	03_Water2	m2
17	PltCover	(12, 315)	1059.22	03_Water2	m2
17	PltCover	(12, 316)	431.251	03_Water2	m2
17	PltCover	(12, 317)	117.76	03_Water2	m2
17	PltCover	(12, 7)	2420.77	03_Water2	m2
17	PltCover	(12, 8)	2125.15	03_Water2	m2
17	PltCover	(12, 9)	317.17	03_Water2	m2
17	PltCover	(13, 21)	111.301	03_Water2	m2
17	PltCover	(13, 313)	1851.52	03_Water2	m2
17	PltCover	(13, 314)	338.41	03_Water2	m2
17	PltCover	(13, 315)	1147.25	03_Water2	m2
17	PltCover	(13, 316)	564.75	03_Water2	m2
17	PltCover	(13, 317)	143.95	03_Water2	m2
17	PltCover	(13, 7)	1903.45	03_Water2	m2
17	PltCover	(13, 8)	2572.15	03_Water2	m2
17	PltCover	(13, 9)	317.17	03_Water2	m2
17	PltCover	(14, 21)	111.301	03_Water2	m2
17	PltCover	(14, 313)	1405.52	03_Water2	m2
17	PltCover	(14, 314)	635.73	03_Water2	m2
17	PltCover	(14, 315)	1069.73	03_Water2	m2
17	PltCover	(14, 316)	513.92	03_Water2	m2
17	PltCover	(14, 317)	143.95	03_Water2	m2
17	PltCover	(14, 7)	2024.47	03_Water2	m2
17	PltCover	(14, 8)	2777.09	03_Water2	m2
17	PltCover	(14, 9)	324.8	03_Water2	m2
17	PltCover	(15, 21)	74.72	03_Water2	m2
17	PltCover	(15, 313)	2138.38	03_Water2	m2
17	PltCover	(15, 314)	635.73	03_Water2	m2
17	PltCover	(15, 315)	1069.73	03_Water2	m2
17	PltCover	(15, 316)	410.315	03_Water2	m2
17	PltCover	(15, 317)	143.95	03_Water2	m2
17	PltCover	(15, 7)	1382.21	03_Water2	m2
17	PltCover	(15, 8)	2919.11	03_Water2	m2
17	PltCover	(15, 9)	324.8	03_Water2	m2
17	PltCover	(16, 21)	157.199	03_Water2	m2
17	PltCover	(16, 313)	2240.57	03_Water2	m2
17	PltCover	(16, 314)	528.985	03_Water2	m2
17	PltCover	(16, 315)	901.434	03_Water2	m2
17	PltCover	(16, 316)	410.315	03_Water2	m2
17	PltCover	(16, 317)	126.318	03_Water2	m2
17	PltCover	(16, 7)	1640.77	03_Water2	m2
17	PltCover	(16, 8)	2750.39	03_Water2	m2
17	PltCover	(16, 9)	162.57	03_Water2	m2
17	PltCover	(17, 21)	157.199	03_Water2	m2
17	PltCover	(17, 313)	2593.66	03_Water2	m2
17	PltCover	(17, 314)	528.985	03_Water2	m2
17	PltCover	(17, 315)	903.85	03_Water2	m2
17	PltCover	(17, 316)	323.4	03_Water2	m2
17	PltCover	(17, 317)	100.128	03_Water2	m2
17	PltCover	(17, 7)	1519.76	03_Water2	m2
17	PltCover	(17, 8)	2684.12	03_Water2	m2
17	PltCover	(17, 9)	162.57	03_Water2	m2
17	PltCover	(18, 21)	193.78	03_Water2	m2
17	PltCover	(18, 313)	2194.68	03_Water2	m2
17	PltCover	(18, 314)	231.665	03_Water2	m2
17	PltCover	(18, 315)	890.916	03_Water2	m2
17	PltCover	(18, 316)	427.005	03_Water2	m2
17	PltCover	(18, 317)	100.128	03_Water2	m2
17	PltCover	(18, 7)	2162.01	03_Water2	m2
17	PltCover	(18, 8)	2746.05	03_Water2	m2
17	PltCover	(18, 9)	154.94	03_Water2	m2
17	PltCover	(19, 21)	193.78	03_Water2	m2
17	PltCover	(19, 313)	2011.43	03_Water2	m2
17	PltCover	(19, 314)	338.41	03_Water2	m2
17	PltCover	(19, 315)	1059.22	03_Water2	m2
17	PltCover	(19, 316)	427.005	03_Water2	m2
17	PltCover	(19, 317)	117.76	03_Water2	m2
17	PltCover	(19, 7)	2376.05	03_Water2	m2
17	PltCover	(19, 8)	2679.53	03_Water2	m2
17	PltCover	(19, 9)	317.17	03_Water2	m2
17	PltCover	(20, 21)	111.301	03_Water2	m2
17	PltCover	(20, 313)	2152.45	03_Water2	m2
17	PltCover	(20, 314)	338.41	03_Water2	m2
17	PltCover	(20, 315)	1147.25	03_Water2	m2
17	PltCover	(20, 316)	564.75	03_Water2	m2
17	PltCover	(20, 317)	143.95	03_Water2	m2
17	PltCover	(20, 7)	2087.34	03_Water2	m2
17	PltCover	(20, 8)	2988.12	03_Water2	m2
17	PltCover	(20, 9)	317.17	03_Water2	m2
17	PltCover	(21, 21)	111.301	03_Water2	m2
17	PltCover	(21, 313)	2159.82	03_Water2	m2
17	PltCover	(21, 314)	635.73	03_Water2	m2
17	PltCover	(21, 315)	1069.73	03_Water2	m2
17	PltCover	(21, 316)	513.92	03_Water2	m2
17	PltCover	(21, 317)	143.95	03_Water2	m2
17	PltCover	(21, 7)	2024.47	03_Water2	m2
17	PltCover	(21, 8)	3197.61	03_Water2	m2
17	PltCover	(21, 9)	324.8	03_Water2	m2
17	VolCut	1	402878	03_Water2	m2
17	VolCut	2	362590	03_Water2	m2
17	VolCut	3	326331	03_Water2	m2
17	VolCut	4	293698	03_Water2	m2
17	VolCut	5	264328	03_Water2	m2
17	VolCut	6	237895	03_Water2	m2
17	VolCut	7	228631	03_Water2	m2
17	VolCut	8	242347	03_Water2	m2
17	VolCut	9	238330	03_Water2	m2
17	VolCut	10	262163	03_Water2	m2
17	VolCut	11	252087	03_Water2	m2
17	VolCut	12	226879	03_Water2	m2
17	VolCut	13	215862	03_Water2	m2
17	VolCut	14	237449	03_Water2	m2
17	VolCut	15	261194	03_Water2	m2
17	VolCut	16	287313	03_Water2	m2
17	VolCut	17	258582	03_Water2	m2
17	VolCut	18	232723	03_Water2	m2
17	VolCut	19	209451	03_Water2	m2
17	VolCut	20	188506	03_Water2	m2
17	VolCut	21	169655	03_Water2	m2
18	CRemoved	1	364120	03_Water2	m3
18	CRemoved	2	385700	03_Water2	m3
18	CRemoved	3	349473	03_Water2	m3
18	CRemoved	4	364576	03_Water2	m3
18	CRemoved	5	360584	03_Water2	m3
18	CRemoved	6	339369	03_Water2	m3
18	CRemoved	7	322037	03_Water2	m3
18	CRemoved	8	298310	03_Water2	m3
18	CRemoved	9	298310	03_Water2	m3
18	CRemoved	10	298310	03_Water2	m3
18	CRemoved	11	298310	03_Water2	m3
18	CRemoved	12	298310	03_Water2	m3
18	CRemoved	13	298310	03_Water2	m3
18	CRemoved	14	298310	03_Water2	m3
18	CRemoved	15	298310	03_Water2	m3
18	CRemoved	16	298310	03_Water2	m3
18	CRemoved	17	298310	03_Water2	m3
18	CRemoved	18	298310	03_Water2	m3
18	CRemoved	19	298310	03_Water2	m3
18	CRemoved	20	298310	03_Water2	m3
18	CRemoved	21	298310	03_Water2	m3
18	DscCosts	1	5.31102e+07	03_Water2	m3
18	DscCosts	2	4.80699e+07	03_Water2	m3
18	DscCosts	3	4.0331e+07	03_Water2	m3
18	DscCosts	4	3.65451e+07	03_Water2	m3
18	DscCosts	5	3.24318e+07	03_Water2	m3
18	DscCosts	6	2.88514e+07	03_Water2	m3
18	DscCosts	7	2.39676e+07	03_Water2	m3
18	DscCosts	8	2.27598e+07	03_Water2	m3
18	DscCosts	9	2.14176e+07	03_Water2	m3
18	DscCosts	10	2.11615e+07	03_Water2	m3
18	DscCosts	11	1.94106e+07	03_Water2	m3
18	DscCosts	12	1.63467e+07	03_Water2	m3
18	DscCosts	13	1.41674e+07	03_Water2	m3
18	DscCosts	14	1.73278e+07	03_Water2	m3
18	DscCosts	15	1.704e+07	03_Water2	m3
18	DscCosts	16	1.78654e+07	03_Water2	m3
18	DscCosts	17	1.53152e+07	03_Water2	m3
18	DscCosts	18	1.32229e+07	03_Water2	m3
18	DscCosts	19	1.13856e+07	03_Water2	m3
18	DscCosts	20	9.49458e+06	03_Water2	m3
18	DscCosts	21	8.48192e+06	03_Water2	m3
18	DscRevenue	1	7.92285e+07	03_Water2	m3
18	DscRevenue	2	7.3463e+07	03_Water2	m3
18	DscRevenue	3	6.26103e+07	03_Water2	m3
18	DscRevenue	4	5.7917e+07	03_Water2	m3
18	DscRevenue	5	5.20861e+07	03_Water2	m3
18	DscRevenue	6	4.54797e+07	03_Water2	m3
18	DscRevenue	7	4.0906e+07	03_Water2	m3
18	DscRevenue	8	3.76648e+07	03_Water2	m3
18	DscRevenue	9	3.5295e+07	03_Water2	m3
18	DscRevenue	10	3.4628e+07	03_Water2	m3
18	DscRevenue	11	3.21372e+07	03_Water2	m3
18	DscRevenue	12	2.90653e+07	03_Water2	m3
18	DscRevenue	13	2.69036e+07	03_Water2	m3
18	DscRevenue	14	2.63355e+07	03_Water2	m3
18	DscRevenue	15	2.58356e+07	03_Water2	m3
18	DscRevenue	16	2.54014e+07	03_Water2	m3
18	DscRevenue	17	2.28966e+07	03_Water2	m3
18	DscRevenue	18	2.06946e+07	03_Water2	m3
18	DscRevenue	19	1.87541e+07	03_Water2	m3
18	DscRevenue	20	1.70394e+07	03_Water2	m3
18	DscRevenue	21	1.62123e+08	03_Water2	m3
18	PltCover	(01, 21)	74.72	03_Water2	m3
18	PltCover	(01, 313)	2133.98	03_Water2	m3
18	PltCover	(01, 314)	635.73	03_Water2	m3
18	PltCover	(01, 315)	1160.18	03_Water2	m3
18	PltCover	(01, 316)	564.75	03_Water2	m3
18	PltCover	(01, 317)	143.95	03_Water2	m3
18	PltCover	(01, 7)	1582.85	03_Water2	m3
18	PltCover	(01, 8)	3086.76	03_Water2	m3
18	PltCover	(01, 9)	324.8	03_Water2	m3
18	PltCover	(02, 21)	74.72	03_Water2	m3
18	PltCover	(02, 313)	2261.68	03_Water2	m3
18	PltCover	(02, 314)	635.73	03_Water2	m3
18	PltCover	(02, 315)	965.19	03_Water2	m3
18	PltCover	(02, 316)	410.315	03_Water2	m3
18	PltCover	(02, 317)	143.95	03_Water2	m3
18	PltCover	(02, 7)	1123.46	03_Water2	m3
18	PltCover	(02, 8)	3411.46	03_Water2	m3
18	PltCover	(02, 9)	324.8	03_Water2	m3
18	PltCover	(03, 21)	74.72	03_Water2	m3
18	PltCover	(03, 313)	2059.62	03_Water2	m3
18	PltCover	(03, 314)	635.73	03_Water2	m3
18	PltCover	(03, 315)	877.16	03_Water2	m3
18	PltCover	(03, 316)	272.57	03_Water2	m3
18	PltCover	(03, 317)	117.76	03_Water2	m3
18	PltCover	(03, 7)	962.935	03_Water2	m3
18	PltCover	(03, 8)	3035.02	03_Water2	m3
18	PltCover	(03, 9)	154.94	03_Water2	m3
18	PltCover	(04, 21)	193.78	03_Water2	m3
18	PltCover	(04, 313)	2059.62	03_Water2	m3
18	PltCover	(04, 314)	231.665	03_Water2	m3
18	PltCover	(04, 315)	877.16	03_Water2	m3
18	PltCover	(04, 316)	272.57	03_Water2	m3
18	PltCover	(04, 317)	117.76	03_Water2	m3
18	PltCover	(04, 7)	1961.37	03_Water2	m3
18	PltCover	(04, 8)	2864.67	03_Water2	m3
18	PltCover	(04, 9)	154.94	03_Water2	m3
18	PltCover	(05, 21)	193.78	03_Water2	m3
18	PltCover	(05, 313)	2087.04	03_Water2	m3
18	PltCover	(05, 314)	231.665	03_Water2	m3
18	PltCover	(05, 315)	1072.15	03_Water2	m3
18	PltCover	(05, 316)	427.005	03_Water2	m3
18	PltCover	(05, 317)	117.76	03_Water2	m3
18	PltCover	(05, 7)	2420.77	03_Water2	m3
18	PltCover	(05, 8)	2189.03	03_Water2	m3
18	PltCover	(05, 9)	154.94	03_Water2	m3
18	PltCover	(06, 21)	193.78	03_Water2	m3
18	PltCover	(06, 313)	1797.13	03_Water2	m3
18	PltCover	(06, 314)	231.665	03_Water2	m3
18	PltCover	(06, 315)	1160.18	03_Water2	m3
18	PltCover	(06, 316)	564.75	03_Water2	m3
18	PltCover	(06, 317)	143.95	03_Water2	m3
18	PltCover	(06, 7)	2581.29	03_Water2	m3
18	PltCover	(06, 8)	1857.86	03_Water2	m3
18	PltCover	(06, 9)	324.8	03_Water2	m3
18	PltCover	(07, 21)	156.57	03_Water2	m3
18	PltCover	(07, 313)	1797.13	03_Water2	m3
18	PltCover	(07, 314)	635.73	03_Water2	m3
18	PltCover	(07, 315)	1160.18	03_Water2	m3
18	PltCover	(07, 316)	564.75	03_Water2	m3
18	PltCover	(07, 317)	143.95	03_Water2	m3
18	PltCover	(07, 7)	1912.97	03_Water2	m3
18	PltCover	(07, 8)	2344.82	03_Water2	m3
18	PltCover	(07, 9)	324.8	03_Water2	m3
18	PltCover	(08, 21)	74.72	03_Water2	m3
18	PltCover	(08, 313)	1821.86	03_Water2	m3
18	PltCover	(08, 314)	635.73	03_Water2	m3
18	PltCover	(08, 315)	1024.75	03_Water2	m3
18	PltCover	(08, 316)	410.315	03_Water2	m3
18	PltCover	(08, 317)	143.95	03_Water2	m3
18	PltCover	(08, 7)	1521.75	03_Water2	m3
18	PltCover	(08, 8)	3196.16	03_Water2	m3
18	PltCover	(08, 9)	324.8	03_Water2	m3
18	PltCover	(09, 21)	74.72	03_Water2	m3
18	PltCover	(09, 313)	2261.68	03_Water2	m3
18	PltCover	(09, 314)	635.73	03_Water2	m3
18	PltCover	(09, 315)	965.19	03_Water2	m3
18	PltCover	(09, 316)	406.069	03_Water2	m3
18	PltCover	(09, 317)	143.95	03_Water2	m3
18	PltCover	(09, 7)	1123.46	03_Water2	m3
18	PltCover	(09, 8)	3403.93	03_Water2	m3
18	PltCover	(09, 9)	232.13	03_Water2	m3
18	PltCover	(10, 21)	111.93	03_Water2	m3
18	PltCover	(10, 313)	2120.66	03_Water2	m3
18	PltCover	(10, 314)	528.985	03_Water2	m3
18	PltCover	(10, 315)	877.16	03_Water2	m3
18	PltCover	(10, 316)	272.57	03_Water2	m3
18	PltCover	(10, 317)	117.76	03_Water2	m3
18	PltCover	(10, 7)	1791.78	03_Water2	m3
18	PltCover	(10, 8)	2872.85	03_Water2	m3
18	PltCover	(10, 9)	232.13	03_Water2	m3
18	PltCover	(11, 21)	193.78	03_Water2	m3
18	PltCover	(11, 313)	2500.45	03_Water2	m3
18	PltCover	(11, 314)	231.665	03_Water2	m3
18	PltCover	(11, 315)	1012.59	03_Water2	m3
18	PltCover	(11, 316)	427.005	03_Water2	m3
18	PltCover	(11, 317)	117.76	03_Water2	m3
18	PltCover	(11, 7)	2022.48	03_Water2	m3
18	PltCover	(11, 8)	2245.43	03_Water2	m3
18	PltCover	(11, 9)	154.94	03_Water2	m3
18	PltCover	(12, 21)	193.78	03_Water2	m3
18	PltCover	(12, 313)	1819.75	03_Water2	m3
18	PltCover	(12, 314)	231.665	03_Water2	m3
18	PltCover	(12, 315)	1072.15	03_Water2	m3
18	PltCover	(12, 316)	431.251	03_Water2	m3
18	PltCover	(12, 317)	117.76	03_Water2	m3
18	PltCover	(12, 7)	2420.77	03_Water2	m3
18	PltCover	(12, 8)	2194.71	03_Water2	m3
18	PltCover	(12, 9)	247.61	03_Water2	m3
18	PltCover	(13, 21)	177.07	03_Water2	m3
18	PltCover	(13, 313)	1838.58	03_Water2	m3
18	PltCover	(13, 314)	338.41	03_Water2	m3
18	PltCover	(13, 315)	1160.18	03_Water2	m3
18	PltCover	(13, 316)	564.75	03_Water2	m3
18	PltCover	(13, 317)	143.95	03_Water2	m3
18	PltCover	(13, 7)	1889.91	03_Water2	m3
18	PltCover	(13, 8)	2589.48	03_Water2	m3
18	PltCover	(13, 9)	247.61	03_Water2	m3
18	PltCover	(14, 21)	156.57	03_Water2	m3
18	PltCover	(14, 313)	1418.45	03_Water2	m3
18	PltCover	(14, 314)	635.73	03_Water2	m3
18	PltCover	(14, 315)	1056.8	03_Water2	m3
18	PltCover	(14, 316)	513.92	03_Water2	m3
18	PltCover	(14, 317)	143.95	03_Water2	m3
18	PltCover	(14, 7)	2024.86	03_Water2	m3
18	PltCover	(14, 8)	2731.43	03_Water2	m3
18	PltCover	(14, 9)	324.8	03_Water2	m3
18	PltCover	(15, 21)	74.72	03_Water2	m3
18	PltCover	(15, 313)	2151.31	03_Water2	m3
18	PltCover	(15, 314)	635.73	03_Water2	m3
18	PltCover	(15, 315)	1056.8	03_Water2	m3
18	PltCover	(15, 316)	410.315	03_Water2	m3
18	PltCover	(15, 317)	143.95	03_Water2	m3
18	PltCover	(15, 7)	1382.21	03_Water2	m3
18	PltCover	(15, 8)	2919.11	03_Water2	m3
18	PltCover	(15, 9)	324.8	03_Water2	m3
18	PltCover	(16, 21)	91.43	03_Water2	m3
18	PltCover	(16, 313)	2159.19	03_Water2	m3
18	PltCover	(16, 314)	528.985	03_Water2	m3
18	PltCover	(16, 315)	965.19	03_Water2	m3
18	PltCover	(16, 316)	410.315	03_Water2	m3
18	PltCover	(16, 317)	143.95	03_Water2	m3
18	PltCover	(16, 7)	1654.31	03_Water2	m3
18	PltCover	(16, 8)	2733.06	03_Water2	m3
18	PltCover	(16, 9)	232.13	03_Water2	m3
18	PltCover	(17, 21)	111.93	03_Water2	m3
18	PltCover	(17, 313)	2499.34	03_Water2	m3
18	PltCover	(17, 314)	528.985	03_Water2	m3
18	PltCover	(17, 315)	980.54	03_Water2	m3
18	PltCover	(17, 316)	323.4	03_Water2	m3
18	PltCover	(17, 317)	117.76	03_Water2	m3
18	PltCover	(17, 7)	1519.37	03_Water2	m3
18	PltCover	(17, 8)	2660.22	03_Water2	m3
18	PltCover	(17, 9)	232.13	03_Water2	m3
18	PltCover	(18, 21)	193.78	03_Water2	m3
18	PltCover	(18, 313)	2087.42	03_Water2	m3
18	PltCover	(18, 314)	231.665	03_Water2	m3
18	PltCover	(18, 315)	980.54	03_Water2	m3
18	PltCover	(18, 316)	427.005	03_Water2	m3
18	PltCover	(18, 317)	117.76	03_Water2	m3
18	PltCover	(18, 7)	2162.01	03_Water2	m3
18	PltCover	(18, 8)	2746.05	03_Water2	m3
18	PltCover	(18, 9)	154.94	03_Water2	m3
18	PltCover	(19, 21)	193.78	03_Water2	m3
18	PltCover	(19, 313)	1998.5	03_Water2	m3
18	PltCover	(19, 314)	338.41	03_Water2	m3
18	PltCover	(19, 315)	1072.15	03_Water2	m3
18	PltCover	(19, 316)	427.005	03_Water2	m3
18	PltCover	(19, 317)	117.76	03_Water2	m3
18	PltCover	(19, 7)	2376.05	03_Water2	m3
18	PltCover	(19, 8)	2749.09	03_Water2	m3
18	PltCover	(19, 9)	247.61	03_Water2	m3
18	PltCover	(20, 21)	156.57	03_Water2	m3
18	PltCover	(20, 313)	2139.52	03_Water2	m3
18	PltCover	(20, 314)	338.41	03_Water2	m3
18	PltCover	(20, 315)	1160.18	03_Water2	m3
18	PltCover	(20, 316)	564.75	03_Water2	m3
18	PltCover	(20, 317)	143.95	03_Water2	m3
18	PltCover	(20, 7)	2087.73	03_Water2	m3
18	PltCover	(20, 8)	3012.02	03_Water2	m3
18	PltCover	(20, 9)	247.61	03_Water2	m3
18	PltCover	(21, 21)	156.57	03_Water2	m3
18	PltCover	(21, 313)	2172.75	03_Water2	m3
18	PltCover	(21, 314)	635.73	03_Water2	m3
18	PltCover	(21, 315)	1056.8	03_Water2	m3
18	PltCover	(21, 316)	513.92	03_Water2	m3
18	PltCover	(21, 317)	143.95	03_Water2	m3
18	PltCover	(21, 7)	2024.86	03_Water2	m3
18	PltCover	(21, 8)	3151.95	03_Water2	m3
18	PltCover	(21, 9)	324.8	03_Water2	m3
18	VolCut	1	402878	03_Water2	m3
18	VolCut	2	362590	03_Water2	m3
18	VolCut	3	326331	03_Water2	m3
18	VolCut	4	293698	03_Water2	m3
18	VolCut	5	264328	03_Water2	m3
18	VolCut	6	237895	03_Water2	m3
18	VolCut	7	228631	03_Water2	m3
18	VolCut	8	242347	03_Water2	m3
18	VolCut	9	238330	03_Water2	m3
18	VolCut	10	262163	03_Water2	m3
18	VolCut	11	252087	03_Water2	m3
18	VolCut	12	226879	03_Water2	m3
18	VolCut	13	215862	03_Water2	m3
18	VolCut	14	237449	03_Water2	m3
18	VolCut	15	261194	03_Water2	m3
18	VolCut	16	287313	03_Water2	m3
18	VolCut	17	258582	03_Water2	m3
18	VolCut	18	232723	03_Water2	m3
18	VolCut	19	209451	03_Water2	m3
18	VolCut	20	188506	03_Water2	m3
18	VolCut	21	169655	03_Water2	m3
19	AgeControl	1	4.90925	03_Water	m1
19	AgeControl	2	4.96491	03_Water	m1
19	AgeControl	3	5.02995	03_Water	m1
19	AgeControl	4	5.29111	03_Water	m1
19	AgeControl	5	5.57376	03_Water	m1
19	AgeControl	6	5.87071	03_Water	m1
19	AgeControl	7	6.33477	03_Water	m1
19	AgeControl	8	6.71874	03_Water	m1
19	AgeControl	9	7.10872	03_Water	m1
19	AgeControl	10	7.35802	03_Water	m1
19	AgeControl	11	7.66127	03_Water	m1
19	AgeControl	12	7.98679	03_Water	m1
19	AgeControl	13	8.36369	03_Water	m1
19	AgeControl	14	8.69412	03_Water	m1
19	AgeControl	15	9.05978	03_Water	m1
19	AgeControl	16	9.32294	03_Water	m1
19	AgeControl	17	9.71629	03_Water	m1
19	AgeControl	18	10.1773	03_Water	m1
19	AgeControl	19	10.596	03_Water	m1
19	AgeControl	20	11.1493	03_Water	m1
19	AgeControl	21	11.7343	03_Water	m1
19	CRemoved	1	364120	03_Water	m1
19	CRemoved	2	385700	03_Water	m1
19	CRemoved	3	349473	03_Water	m1
19	CRemoved	4	364576	03_Water	m1
19	CRemoved	5	360584	03_Water	m1
19	CRemoved	6	339369	03_Water	m1
19	CRemoved	7	322037	03_Water	m1
19	CRemoved	8	298310	03_Water	m1
19	CRemoved	9	298310	03_Water	m1
19	CRemoved	10	298310	03_Water	m1
19	CRemoved	11	298310	03_Water	m1
19	CRemoved	12	298310	03_Water	m1
19	CRemoved	13	298310	03_Water	m1
19	CRemoved	14	298310	03_Water	m1
19	CRemoved	15	298310	03_Water	m1
19	CRemoved	16	298310	03_Water	m1
19	CRemoved	17	298310	03_Water	m1
19	CRemoved	18	298310	03_Water	m1
19	CRemoved	19	298310	03_Water	m1
19	CRemoved	20	298310	03_Water	m1
19	CRemoved	21	298310	03_Water	m1
19	DscCosts	1	5.31102e+07	03_Water	m1
19	DscCosts	2	4.80699e+07	03_Water	m1
19	DscCosts	3	4.0331e+07	03_Water	m1
19	DscCosts	4	3.65451e+07	03_Water	m1
[truncated: 2,348 more rows]

## Sheet: Inventory
ModelType	m3
AcctVar	Inventory
Sum of Value	Column Labels
Row Labels	01_NPV_Inv	02_Carbon_Inv	03_Water_Inv
1	1.98292e+06	1.98374e+06	2.00971e+06
2	1.91402e+06	1.92706e+06	1.97298e+06
3	1.85318e+06	1.87628e+06	1.93833e+06
4	1.85066e+06	1.88777e+06	1.96085e+06
5	1.88054e+06	1.93501e+06	2.01425e+06
6	1.9214e+06	1.99571e+06	2.0749e+06
7	1.91127e+06	2.05423e+06	2.12818e+06
8	1.93735e+06	2.06671e+06	2.14582e+06
9	1.97919e+06	2.0669e+06	2.16565e+06
10	2.033e+06	2.04148e+06	2.16265e+06
11	2.05523e+06	2.05078e+06	2.17282e+06
12	2.04947e+06	2.08948e+06	2.21083e+06
13	1.99796e+06	2.14406e+06	2.25941e+06
14	1.9907e+06	2.17726e+06	2.28686e+06
15	2.01883e+06	2.18036e+06	2.28536e+06
16	2.08863e+06	2.1561e+06	2.25785e+06
17	2.14801e+06	2.16444e+06	2.26146e+06
18	2.15468e+06	2.20063e+06	2.2921e+06
19	2.10861e+06	2.26223e+06	2.34786e+06
20	2.01662e+06	2.34544e+06	2.42483e+06
21	1.88124e+06	2.44938e+06	2.52213e+06
Grand Total	4.17735e+07	4.40551e+07	4.58948e+07

## Sheet: HarvestVolume
AcctVar	VolCut
ModelType	m3
Sum of Value	Column Labels
Row Labels	01_NPV_Inv	02_Carbon_Inv	03_Water_Inv
1	426991	426248	402878
2	384292	383623	362590
3	345863	345261	326331
4	311277	310735	293698
5	280149	279661	264328
6	252134	251695	237895
7	277348	236599	228631
8	249613	260259	242347
9	224651	268827	238330
10	242873	295710	262163
11	267161	266139	252087
12	282452	239525	226879
13	310697	223043	215862
14	279627	245347	237449
15	251665	269882	261194
16	229688	296870	287313
17	252656	267183	258582
18	277922	240465	232723
19	305714	216418	209451
20	336286	194776	188506
21	369914	175299	169655

## Sheet: InventoryXVolCut
Scenario	01_NPV_Inv
ModelType	m3
Sum of Value	Column Labels
Row Labels	Inventory	VolCut	Grand Total
1	1.98292e+06	426991	2.40991e+06
2	1.91402e+06	384292	2.29832e+06
3	1.85318e+06	345863	2.19904e+06
4	1.85066e+06	311277	2.16193e+06
5	1.88054e+06	280149	2.16069e+06
6	1.9214e+06	252134	2.17354e+06
7	1.91127e+06	277348	2.18861e+06
8	1.93735e+06	249613	2.18696e+06
9	1.97919e+06	224651	2.20384e+06
10	2.033e+06	242873	2.27587e+06
11	2.05523e+06	267161	2.32239e+06
12	2.04947e+06	282452	2.33192e+06
13	1.99796e+06	310697	2.30865e+06
14	1.9907e+06	279627	2.27032e+06
15	2.01883e+06	251665	2.2705e+06
16	2.08863e+06	229688	2.31832e+06
17	2.14801e+06	252656	2.40067e+06
18	2.15468e+06	277922	2.43261e+06
19	2.10861e+06	305714	2.41432e+06
20	2.01662e+06	336286	2.3529e+06
21	1.88124e+06	369914	2.25115e+06
Grand Total	4.17735e+07	6.15897e+06	4.79325e+07
